# Supplementary material for: Computational insights into the [Ni]H-catalyzed remote C(sp3)–H hydroamidation of alkenes: mechanism and insertion selectivity
Source: Royal Society of Chemistry journal article supplement (doi:10.1039/d2cy01177h), 2022-01-01
Supplement: d2cy01177h1.pdf [file d2cy01177h1.pdf]

## Supporting Information

# Computational insights into [Ni]H-catalyzed remote C(sp<sup>3</sup>)-H hydroamidation of alkenes: mechanism and insertion selectivity

Juping Wang, <sup>\*a</sup> Zhenjie Zheng, <sup>a</sup> Zijie Lin, <sup>a</sup> Rongxing Xiao, <sup>a</sup> and Tifang Miao<sup>b</sup>

<sup>a</sup> Prof. J. Wang, Z. Zheng, Z. Lin and R. Xiao. School of Pharmacy, Guangdong Pharmaceutical University, Guangzhou 510006, P. R. China

<sup>b</sup> Prof. T. Miao. Department of Chemistry, Huaibei Normal University, Huaibei, 23500, P. R. China

<sup>a</sup> Email address: jupingwang@gdpu.edu.cn

## Table of Contents

|                                                                                              |    |
|----------------------------------------------------------------------------------------------|----|
| 1. Free energy profile of the formation of Ni(II)H/Ni(I)H catalytic species (Fig. S1).....   | S3 |
| 2. Free energy profiles of the hydroamidation of alkenes by Ni(I)H catalysis (Fig. S2) ..... | S4 |
| 3. Free energy profile of the chain walking by [Ni]H <sub>p</sub> catalysis (Fig. S3) .....  | S7 |
| 4. Comparison of priority of chain walking and CO <sub>2</sub> extrusion (Fig. S4) .....     | S8 |
| 5. Reference.....                                                                            | S9 |
| 6. Cartesian coordinates of species.....                                                     | S9 |

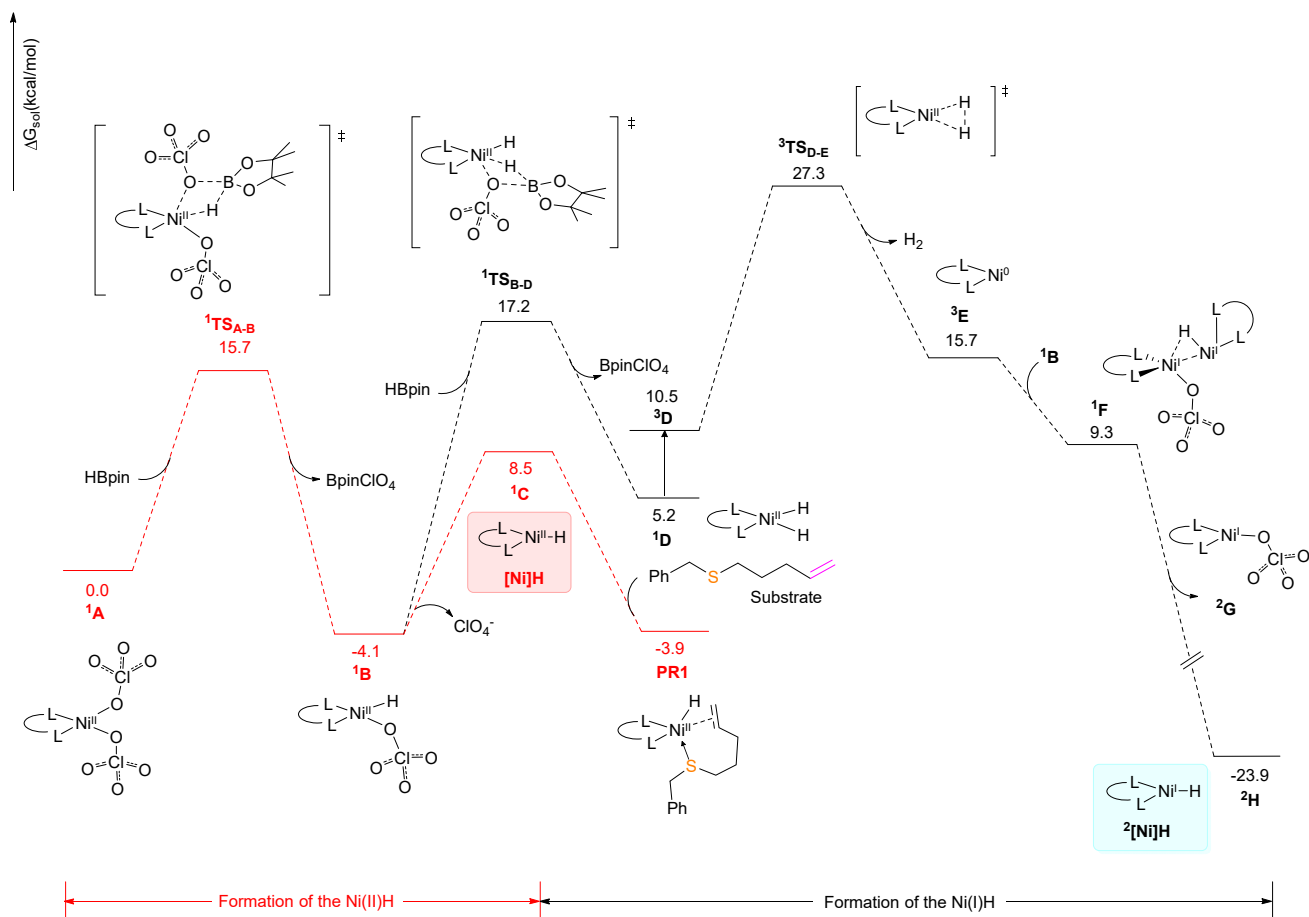

**Fig. S1** Free energy profile of the formation of Ni(II)H/Ni(I)H catalytic species. The superscript (left) of the name of species represents the spin state of the species. For example,  $^1\mathbf{A}$  and  $^2\mathbf{H}$  are singlet and doublet state species, respectively. The formation mechanism of NiH is similar to that of CuH.<sup>1</sup> The transfer of hydride from HBpin to  $^1\mathbf{A}$  proceeds through a transition state  $^1\mathbf{TSA-B}$ , affording the Ni(II) hydride species  $^1\mathbf{B}$ . Then, the cleavage of coordination bond Ni-O in  $^1\mathbf{B}$  generates the nickel(II) catalytic species  $[\text{Ni}]\text{H}$  that readily coordinates with the substrate accompanying by a decrease in energy by 12.4 kcal/mol, triggering the catalytic reaction. Alternatively,  $^1\mathbf{B}$  can also accept hydride from HBpin via a transition state  $^1\mathbf{TSB-D}$  to generate singlet  $^1\mathbf{D}$ , which converts into triplet  $^3\mathbf{D}$ , followed by a  $\text{H}_2$  release transition state  $^3\mathbf{TSD-E}$  with a barrier of 22.1 kcal/mol (relative to  $^1\mathbf{D}$ ). In  $^3\mathbf{E}$ , the nickel center has been reduced to nickel(0). Subsequently, the comproportionation of the nickel(0) species  $^3\mathbf{E}$  with nickel(II) hydride  $^1\mathbf{B}$  results in the formation of dimeric nickel(I) species  $^1\mathbf{F}$  that dissociates to give nickel(I) hydride  $^2[\text{Ni}]\text{H}$ . For Ni-catalyzed hydrofunctionalization reactions, both Ni(I)H and Ni(II)H are likely to be catalytic species.<sup>2-4</sup> We also consider the situation of alkene hydroamidation using  $^2[\text{Ni}]\text{H}$  as catalyst and the corresponding free energy profile is shown in Fig. S2.

(a) Free energy profile of chain walking catalyzed by Ni(I)H

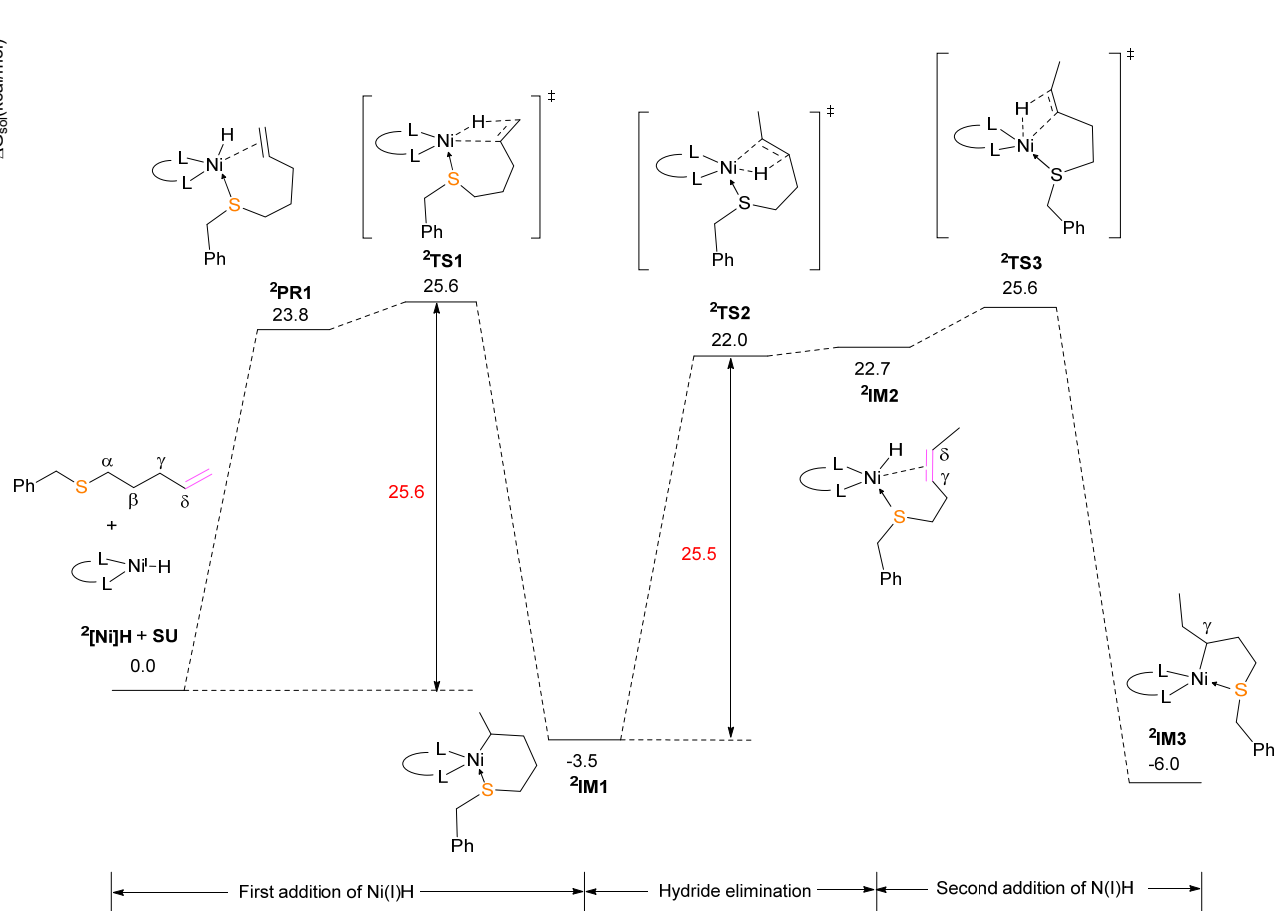

(b) Free energy profile of CO<sub>2</sub> extrusion, nitrene group insertion and amido protonation by Ni(I)H. The transition state of CO<sub>2</sub> extrusion (<sup>2</sup>TS4\*) was not located

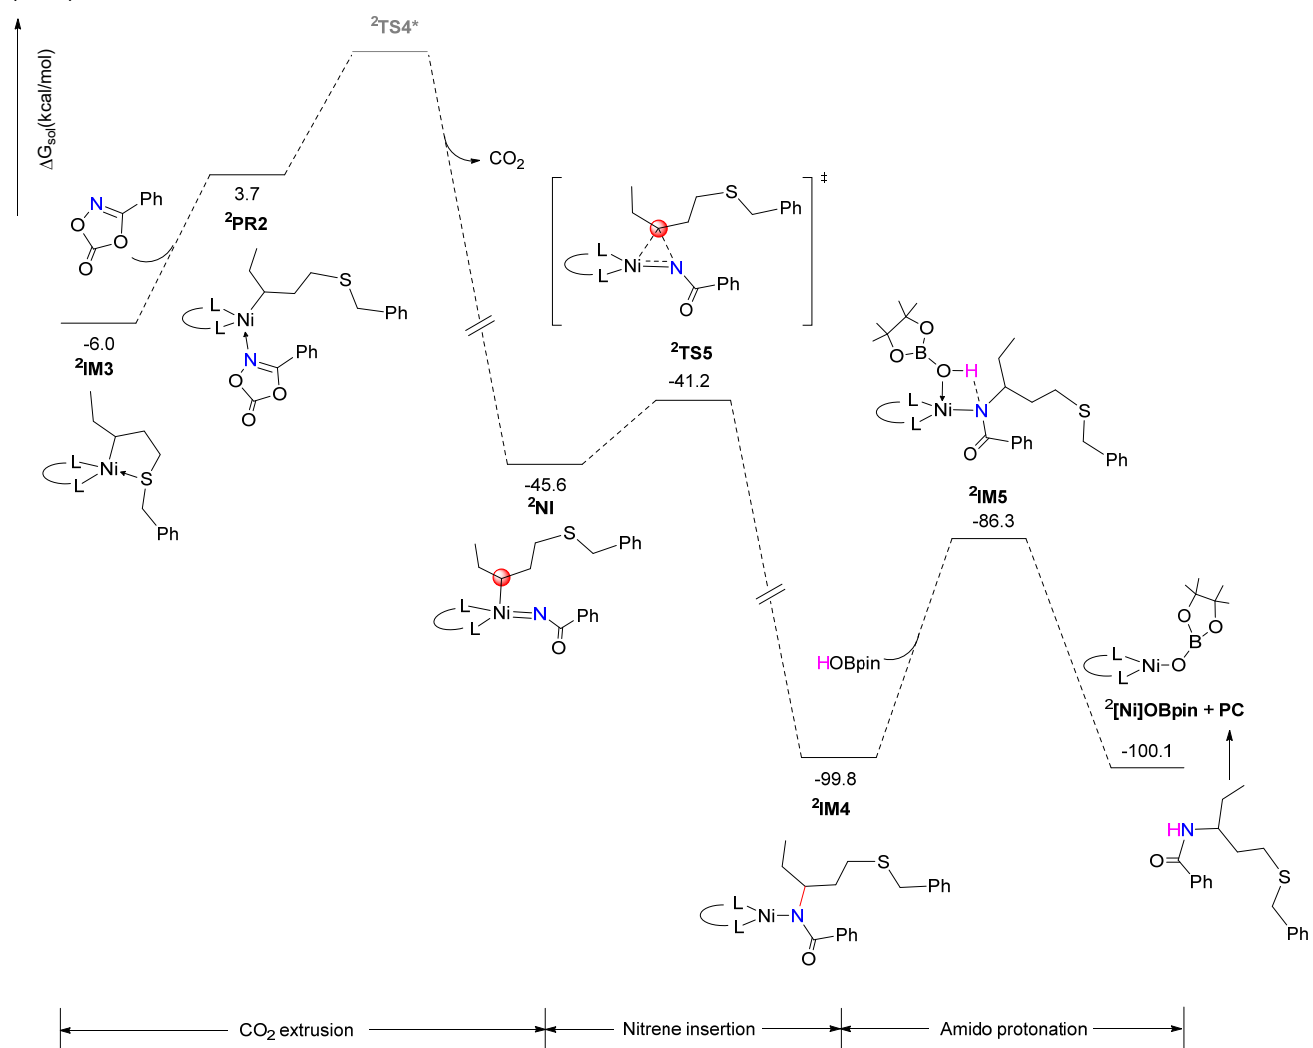

(c) Free energy profile of regeneration Ni(I)H catalyst.

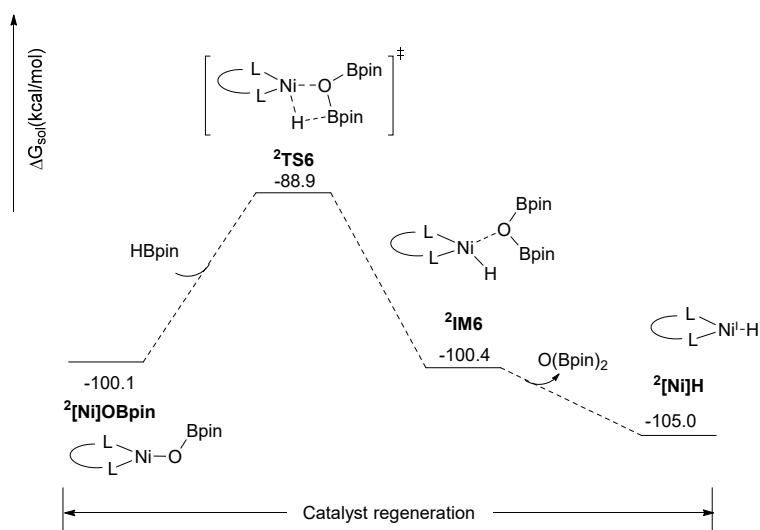

**Fig. S2** Free energy profiles of the hydroamidation of alkenes by Ni(I)H catalysis. The hydride elimination transition state **TS2** by Ni(II)H (see Fig. 1) is greatly lower in energy than  ${}^2\text{TS2}$  by Ni(I)H (18.5 vs. 25.6 kcal/mol), indicating that Ni(II)H catalysis might be more favorable and thus is discussed in the text.

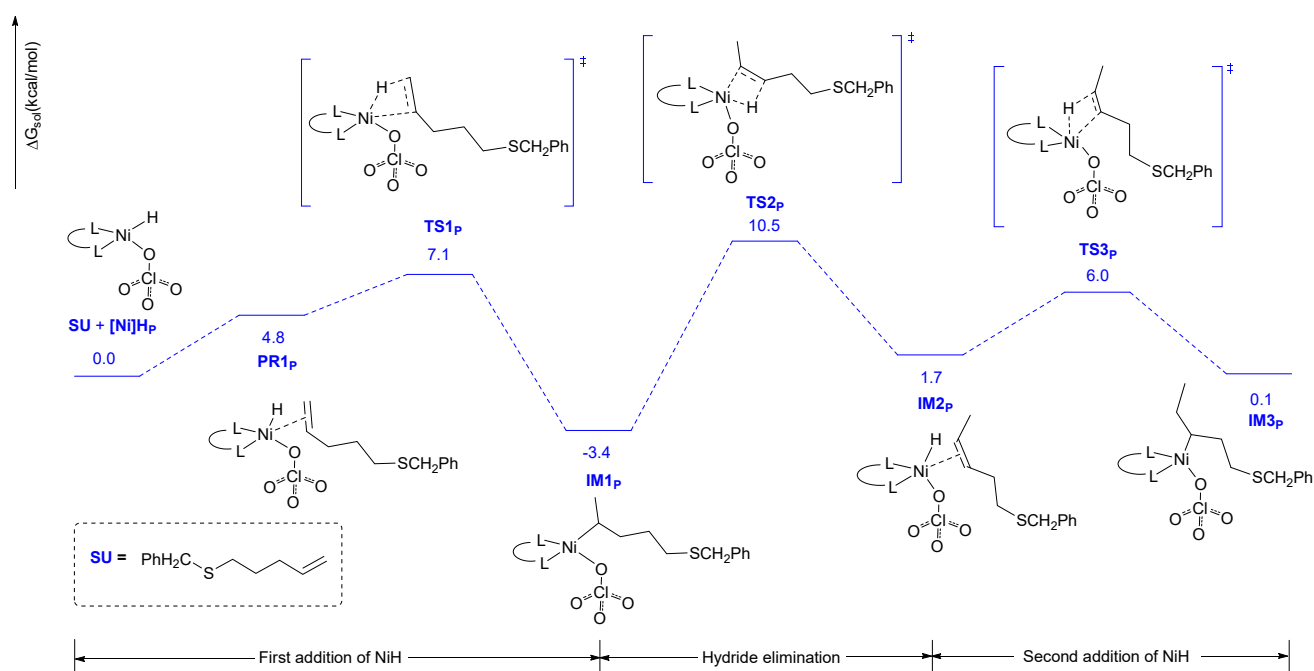

**Fig. S3** Free energy profile of chain walking catalyzed by  $[\text{Ni}]\text{H}_p$  ( $\text{ClO}_4^-$  anion coordinating to Ni center). The nickel hydride species  $[\text{Ni}]\text{H}_p$  combines with the substrate  $\text{SU}$  to form a pentene-coordinated precursor  $\text{PR1}_p$  with an increase in energy by 4.8 kcal/mol. Then the addition of NiH to terminal C=C bond occurs via the transition state  $\text{TS1}_p$ , affording the intermediate  $\text{IM1}_p$ . Subsequently,  $\text{IM1}_p$  undergoes a hydride elimination transition state  $\text{TS2}_p$  to generate intermediate  $\text{IM2}_p$ , followed by a second addition transition state  $\text{TS3}_p$ , giving  $\text{IM3}_p$ . The coordinated S atom was substituted by O atom of  $\text{ClO}_4^-$ , leading to the disappearance of thioether-metallacycle (see Fig. 1 and Fig. S3 for the comparison of geometrics:  $\text{TS1}$  vs.  $\text{TS1}_p$ ,  $\text{IM1}$  vs.  $\text{IM1}_p$ ,  $\text{TS2}$  vs.  $\text{TS2}_p$ ,  $\text{TS3}$  vs.  $\text{TS3}_p$ ,  $\text{IM3}$  vs.  $\text{IM3}_p$ ). As for energy barriers, the addition of NiH with coordinated  $\text{ClO}_4^-$  ( $\text{TS1}_p$  and  $\text{TS3}_p$ ) are higher than those ( $\text{TS1}$  and  $\text{TS3}$ ) without  $\text{ClO}_4^-$ , but for the hydride elimination the former ( $\text{TS2}_p$ ) is lower than the latter ( $\text{TS2}$ ). The coordination ability of  $\text{ClO}_4^-$  is extremely weak and it is hardly coordinated to metal center at the present of the ligands containing N, O or S atoms.<sup>5-6</sup> For the system studied,  $\text{ClO}_4^-$  is readily dissociated in solvent at the presence of 1,10-phenanthroline ligand and alkene substrate that involves a sulfur atom owning higher coordination ability. Thus, the chain walking mechanism by  $[\text{Ni}]\text{H}$  is considered to be favourable relative to by  $[\text{Ni}]\text{H}_p$ .

(a) Free energy profile of pathway a (Chain walking occurring prior to CO<sub>2</sub> extrusion)

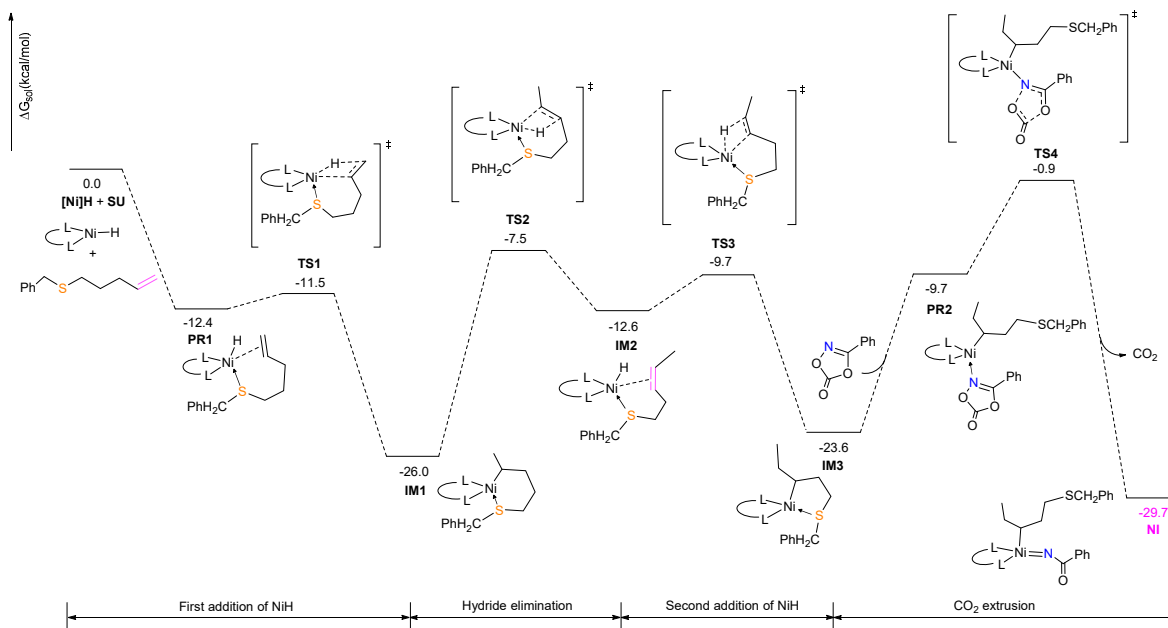

(b) Free energy profile of pathway b (CO<sub>2</sub> extrusion occurring prior to Chain walking)

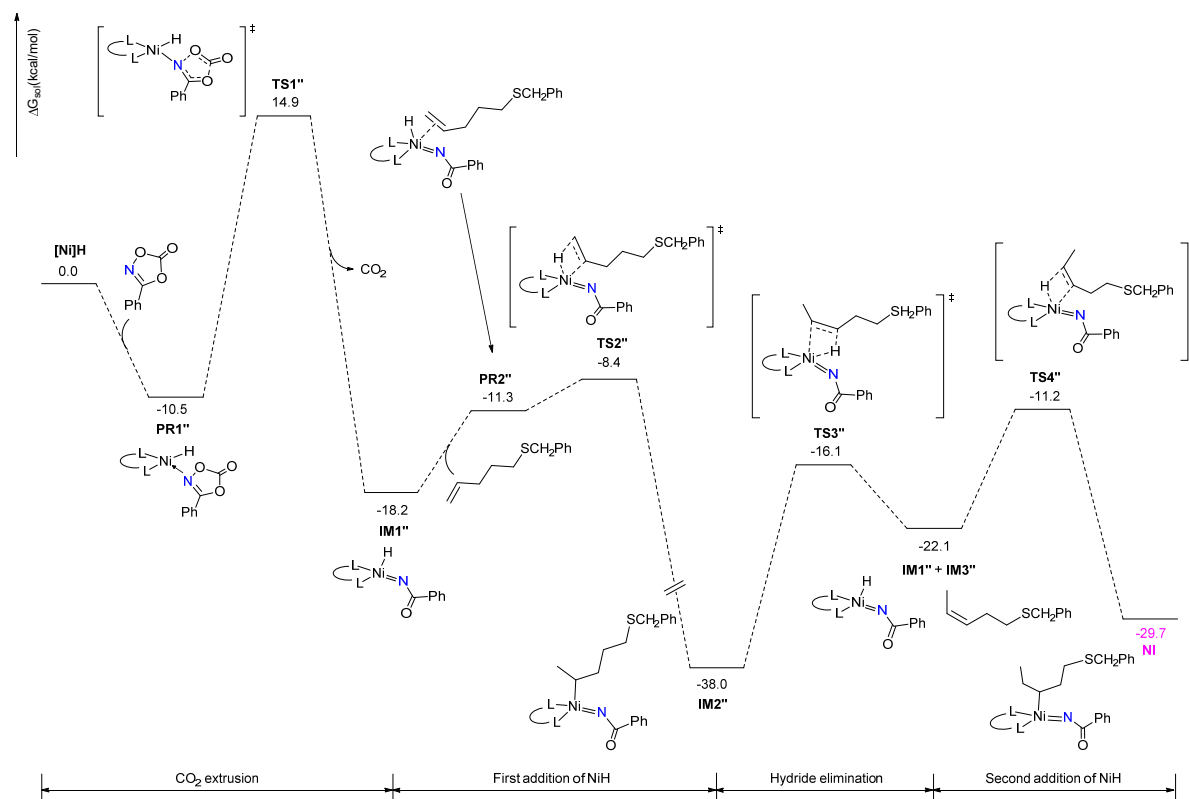

**Fig. S4** Comparison of free energy profiles. For energy barriers, the second addition of NiH (**TS3**) and CO<sub>2</sub> extrusion (**TS4**) require 16.3 and 25.1 kcal/mol, respectively (both **TS3** and **TS4** relative to **IM1**), for pathway a, but these steps (**TS4''** and **TS1''**) require higher barriers: 25.4 and 26.8 kcal/mol, respectively (**TS4''** and **TS1''** relative to **IM2''** and **PR1''**, respectively), for pathway b. This indicates that pathway a is more favorable for the [Ni]H-catalyzed hydroamidation of alkenes.



## Reference

- [1] W. Li, L. Chen, Z. Lin S. Man, X. Qin, Y. Lyu, C. Li and G.Leng, *Inorg. Chem.*, 2020, **59**, 9667–9682.  
[2] C. Lee, H.-J. kang, H. Seo and S. Hong, *J. Am. Chem. Soc.*, 2022, **144**, 9091–9100.  
[3] Y. Zhang, J. Ma, J. Chen, L. Meng, Y. Liang and S. Zhu, *Chem.*, 2021, **7**, 3171–3188.  
[4] Y. He, C. Liu, L. Yu and S. Zhu, *Angew. Chem. Int. Ed.*, 2020, **59**, 21530–21534.  
[5] B.-Q. Ma, H.-L. Sun, S. Gao and G.-X. Xu, *Inorg. Chem.*, 2001, **40**, 6247–6253.  
[6] S. Kanemasa, Y. Oderaotoshi, H. Yamamoto, J.Tanaka, E. Wada and D. P. Curran, *J. Org. Chem.*, 1997, **62**, 6454–6455.

## Cartesian coordinates of species

[Ni]H

Charge: 1, Spin: 1

|    |             |             |             |
|----|-------------|-------------|-------------|
| C  | -3.39655400 | 1.41559500  | 0.96253200  |
| C  | 0.56039700  | 1.52069700  | -0.30932200 |
| C  | 1.26073500  | 2.73885300  | -0.41017100 |
| C  | 2.63688000  | 2.65678800  | -0.72606600 |
| C  | 3.21721500  | 1.42075500  | -0.89008500 |
| C  | 2.45566200  | 0.22706000  | -0.79365000 |
| N  | 1.13844500  | 0.29421800  | -0.53799600 |
| H  | 3.22566800  | 3.56444500  | -0.82001200 |
| H  | 4.27675600  | 1.33352400  | -1.10280300 |
| C  | -0.81213900 | 1.52998000  | 0.09506000  |
| C  | -1.47414400 | 2.74901700  | 0.35352500  |
| C  | -2.81852300 | 2.65613400  | 0.78164800  |
| C  | -2.65934200 | 0.23515000  | 0.70800400  |
| N  | -1.40322000 | 0.31413400  | 0.25680300  |
| H  | -3.38260400 | 3.56192700  | 0.98402900  |
| H  | -4.41770100 | 1.33029700  | 1.31704500  |
| H  | 0.63233000  | -1.99610600 | -1.24915600 |
| Ni | -0.20506700 | -1.06701500 | -0.53817200 |
| C  | 3.15533300  | -1.09702400 | -0.89668400 |
| H  | 2.48480800  | -1.82774900 | -1.35363300 |
| C  | -3.22709100 | -1.13188300 | 1.00777400  |
| H  | -2.59372100 | -1.58395500 | 1.78357300  |
| C  | -3.32818100 | -2.11372400 | -0.17569700 |
| H  | -3.99716700 | -1.71297800 | -0.94561200 |
| C  | 3.62235400  | -1.61918700 | 0.48703800  |
| H  | 4.21709400  | -2.52240300 | 0.30702900  |
| H  | -3.80180900 | -3.02551900 | 0.20406300  |
| C  | -1.98883000 | -2.50591900 | -0.82068300 |
| H  | -1.22836600 | -2.65247700 | -0.01262300 |
| H  | -1.68860100 | -1.70335600 | -1.53680500 |
| H  | 4.30373800  | -0.88695600 | 0.94002100  |
| C  | 2.49020600  | -1.94539300 | 1.46872900  |
| H  | 1.79170500  | -2.64601400 | 0.99055300  |
| H  | 1.90962000  | -1.03849400 | 1.68405600  |
| C  | 0.56278100  | 3.97018400  | -0.17061500 |
| H  | 1.11130100  | 4.90128400  | -0.27300300 |
| C  | -0.75398600 | 3.97813000  | 0.19032100  |
| H  | -1.27044500 | 4.91442500  | 0.37658500  |
| H  | -4.21924900 | -1.00878600 | 1.44986900  |
| H  | 4.02673200  | -0.98277200 | -1.54840700 |
| C  | -2.03114500 | -3.80213100 | -1.63878600 |

|   |             |             |             |
|---|-------------|-------------|-------------|
| H | -1.06142600 | -4.00101200 | -2.10044000 |
| H | -2.29392000 | -4.65072700 | -1.00082000 |
| H | -2.78140000 | -3.72689400 | -2.43144300 |
| C | 3.01249900  | -2.54011400 | 2.78041600  |
| H | 2.19269300  | -2.76517700 | 3.46929000  |
| H | 3.56288100  | -3.46964500 | 2.60049200  |
| H | 3.69163100  | -1.84472700 | 3.28560200  |

**PR1**

Charge: 1, Spin: 1

|   |             |             |             |
|---|-------------|-------------|-------------|
| C | 3.07804600  | 1.13633400  | -2.31489600 |
| C | 2.75433300  | 2.47117000  | -2.29418500 |
| C | 1.53740800  | 2.87566100  | -1.70243800 |
| C | 0.68791400  | 1.85745500  | -1.20773800 |
| C | 2.19461300  | 0.16998100  | -1.77329700 |
| C | 1.15282800  | 4.25024900  | -1.58124200 |
| C | -0.54443800 | 2.22346900  | -0.56655700 |
| C | -0.88152600 | 3.59242400  | -0.42983400 |
| C | -0.01182600 | 4.59668500  | -0.96485400 |
| C | -2.07610000 | 3.89828400  | 0.25745600  |
| C | -2.83660900 | 2.87445200  | 0.77450100  |
| C | -2.44139600 | 1.52748700  | 0.60199200  |
| H | 1.81588600  | 5.01054700  | -1.98249000 |
| H | 4.01990400  | 0.79833800  | -2.73337200 |
| H | -0.29750200 | 5.63900400  | -0.86189000 |
| H | -3.74812300 | 3.08266600  | 1.32429400  |
| N | 1.00250000  | 0.52524100  | -1.27416600 |
| N | -1.32639200 | 1.21759300  | -0.07423700 |
| H | -2.37503300 | 4.93475100  | 0.38385300  |
| H | 3.42722100  | 3.21686700  | -2.70753200 |
| C | -0.87295400 | -3.43522200 | -1.84448900 |
| H | -1.47527400 | -3.90639600 | -2.63122600 |
| H | 0.09081600  | -3.95886500 | -1.85148500 |
| C | -1.56157500 | -3.69245400 | -0.48895200 |
| H | -2.41741200 | -3.02023600 | -0.37376300 |
| H | -1.96223900 | -4.71299800 | -0.48608200 |
| C | -0.64326200 | -3.58766900 | 0.73791100  |
| H | 0.06782900  | -4.41859300 | 0.75068500  |
| H | -1.23234900 | -3.63380600 | 1.65840200  |
| S | 0.38424600  | -2.04000300 | 0.81961800  |
| C | 0.16962400  | -1.48762900 | 2.58059300  |
| H | -0.89838000 | -1.38788600 | 2.78819800  |
| H | 0.58728500  | -2.27638400 | 3.21253700  |
| C | 0.90039700  | -0.18124600 | 2.73558700  |
| C | 2.30165500  | -0.15338300 | 2.78079000  |
| C | 0.19705200  | 1.02800500  | 2.75347700  |
| C | 2.98468900  | 1.06207800  | 2.80947600  |
| H | 2.85577300  | -1.08826600 | 2.78730800  |
| C | 0.87744600  | 2.24597500  | 2.78332500  |
| H | -0.88726900 | 1.01480800  | 2.74398000  |
| C | 2.27345800  | 2.26550100  | 2.79993900  |
| H | 4.06981600  | 1.07025300  | 2.84406800  |
| H | 0.31673400  | 3.17585600  | 2.79537000  |

|    |             |             |             |
|----|-------------|-------------|-------------|
| H  | 2.80527500  | 3.21180500  | 2.82304200  |
| C  | -3.29415400 | 0.42840100  | 1.17492000  |
| C  | -4.36192700 | -0.06886600 | 0.17994300  |
| H  | -3.78433500 | 0.78849700  | 2.08641600  |
| H  | -2.64675600 | -0.40688200 | 1.45671700  |
| C  | -5.09000100 | -1.32164900 | 0.67843300  |
| H  | -5.08405900 | 0.73505900  | -0.01093300 |
| H  | -3.87714100 | -0.28323100 | -0.77854600 |
| C  | -6.12578500 | -1.83838900 | -0.32366500 |
| H  | -4.34772500 | -2.10723500 | 0.88134600  |
| H  | -5.57476800 | -1.10505300 | 1.63932800  |
| H  | -6.62931500 | -2.73439200 | 0.05072500  |
| H  | -6.89310700 | -1.08287700 | -0.52328400 |
| H  | -5.65544800 | -2.09379300 | -1.28043900 |
| C  | 2.67747800  | -1.25113500 | -1.66861200 |
| C  | 3.70200900  | -1.39319400 | -0.52212300 |
| H  | 3.13949000  | -1.55652600 | -2.61509400 |
| H  | 1.84435700  | -1.92197200 | -1.47396300 |
| C  | 4.09677300  | -2.85142100 | -0.27198100 |
| H  | 4.59474400  | -0.79537100 | -0.74705200 |
| H  | 3.26543300  | -0.96881400 | 0.38836100  |
| C  | 5.09653900  | -2.99676400 | 0.87889100  |
| H  | 3.18933900  | -3.42867500 | -0.04889600 |
| H  | 4.52051500  | -3.27972800 | -1.18991000 |
| H  | 5.36462500  | -4.04429200 | 1.04487700  |
| H  | 6.01988700  | -2.44430300 | 0.67376400  |
| H  | 4.67926500  | -2.60755700 | 1.81512100  |
| C  | -1.60213400 | -1.01332200 | -2.45721800 |
| C  | -0.63359200 | -1.98496500 | -2.25344300 |
| H  | -1.39352200 | -0.15877900 | -3.09596500 |
| H  | -2.65268900 | -1.21866800 | -2.27569000 |
| H  | 0.31425900  | -1.81769600 | -2.75653600 |
| Ni | -0.62419100 | -0.57463700 | -0.65742100 |
| H  | -1.78926000 | -1.16694900 | -0.16176600 |

#### TS1

Charge: 1, Spin: 1

|   |             |            |             |
|---|-------------|------------|-------------|
| C | -3.13672300 | 1.36911200 | 2.07344500  |
| C | -2.62795200 | 2.64334200 | 2.14488900  |
| C | -1.30393400 | 2.88036600 | 1.71460800  |
| C | -0.55619700 | 1.76204500 | 1.27649500  |
| C | -2.33855600 | 0.29725200 | 1.60235000  |
| C | -0.71295500 | 4.18522100 | 1.69959700  |
| C | 0.77492300  | 1.96277400 | 0.77889200  |
| C | 1.32729900  | 3.26599900 | 0.75639200  |
| C | 0.55720100  | 4.37120300 | 1.24220800  |
| C | 2.62633900  | 3.40857500 | 0.22351900  |
| C | 3.27295700  | 2.30310500 | -0.28037700 |
| C | 2.65395500  | 1.03306500 | -0.24694500 |
| H | -1.30223700 | 5.02424700 | 2.05673700  |
| H | -4.15920300 | 1.16153500 | 2.36971800  |
| H | 1.00266200  | 5.36115300 | 1.22642100  |
| H | 4.26169600  | 2.38814500 | -0.71822300 |
| N | -1.05672700 | 0.48641400 | 1.25996400  |

|    |             |             |             |
|----|-------------|-------------|-------------|
| N  | 1.44126900  | 0.87040600  | 0.30091700  |
| H  | 3.09329500  | 4.38883900  | 0.19734000  |
| H  | -3.23297200 | 3.46834400  | 2.50962700  |
| Ni | 0.44125600  | -0.80903900 | 0.68548400  |
| C  | 0.02574400  | -2.47576900 | 1.81260000  |
| C  | 1.36074800  | -2.08450900 | 2.03872600  |
| H  | -0.70811100 | -2.13727300 | 2.54007400  |
| H  | 1.64975500  | -1.52275200 | 0.47980300  |
| H  | 1.60269800  | -1.41452100 | 2.86076600  |
| H  | 2.18023200  | -2.74238000 | 1.75645000  |
| C  | -0.32027400 | -3.77234000 | 1.08949000  |
| H  | -0.08845100 | -4.59910800 | 1.77403400  |
| H  | -1.40325200 | -3.82282600 | 0.92298000  |
| C  | 0.41023100  | -4.02398200 | -0.24952200 |
| H  | 1.44763300  | -3.67960000 | -0.18507600 |
| H  | 0.45765600  | -5.10340600 | -0.43086800 |
| C  | -0.25689300 | -3.39753600 | -1.48275500 |
| H  | -1.17695900 | -3.93358200 | -1.73356400 |
| H  | 0.41165700  | -3.45108800 | -2.34691000 |
| S  | -0.72142800 | -1.62681400 | -1.23012600 |
| C  | -0.21294800 | -0.80902000 | -2.81118400 |
| H  | 0.83269300  | -1.05177900 | -3.01684100 |
| H  | -0.83588900 | -1.22643000 | -3.60829600 |
| C  | -0.40982600 | 0.68072300  | -2.65973600 |
| C  | -1.67090000 | 1.20862100  | -2.34513500 |
| C  | 0.67298100  | 1.55628400  | -2.79547700 |
| C  | -1.83664400 | 2.57775700  | -2.13964600 |
| H  | -2.52418000 | 0.54265300  | -2.25814800 |
| C  | 0.50598300  | 2.92922100  | -2.60690100 |
| H  | 1.65322400  | 1.16142700  | -3.04748600 |
| C  | -0.74632600 | 3.44247900  | -2.26569800 |
| H  | -2.81759000 | 2.96988800  | -1.88867200 |
| H  | 1.35673300  | 3.59414000  | -2.71683200 |
| H  | -0.87448700 | 4.50864900  | -2.10690900 |
| C  | 3.37491500  | -0.16290400 | -0.80487600 |
| C  | 4.27895700  | -0.84402800 | 0.24629000  |
| H  | 3.98239600  | 0.14518900  | -1.66326300 |
| H  | 2.63142900  | -0.87742600 | -1.17150800 |
| C  | 4.73106700  | -2.24173900 | -0.18890100 |
| H  | 5.15143400  | -0.20821200 | 0.44081300  |
| H  | 3.73650900  | -0.91503800 | 1.19610300  |
| C  | 5.61757700  | -2.92871300 | 0.85321100  |
| H  | 3.83921700  | -2.85689700 | -0.38034400 |
| H  | 5.26307200  | -2.17321000 | -1.14669200 |
| H  | 5.91664800  | -3.92838700 | 0.52499800  |
| H  | 6.52955000  | -2.35122500 | 1.03800500  |
| H  | 5.09340200  | -3.03311500 | 1.81052400  |
| C  | -2.98490200 | -1.04769900 | 1.41490800  |
| C  | -4.02684700 | -1.03552800 | 0.27649600  |
| H  | -3.46899800 | -1.36005400 | 2.34889000  |
| H  | -2.22319100 | -1.78219100 | 1.17436200  |
| C  | -4.53684500 | -2.44337900 | -0.04760500 |
| H  | -4.86932000 | -0.38401300 | 0.54034000  |
| H  | -3.56292400 | -0.60493300 | -0.61763400 |

|   |             |             |             |
|---|-------------|-------------|-------------|
| C | -5.55287000 | -2.45187700 | -1.19291400 |
| H | -3.67800900 | -3.07665100 | -0.31145000 |
| H | -4.98298700 | -2.88731600 | 0.85216500  |
| H | -5.89911500 | -3.46639200 | -1.41120300 |
| H | -6.43149300 | -1.84586400 | -0.94640900 |
| H | -5.11405100 | -2.04288900 | -2.11020700 |

**IM1**

Charge: 1, Spin: 1

|    |             |             |             |
|----|-------------|-------------|-------------|
| C  | 3.44760100  | -1.50210700 | -2.04585800 |
| C  | 4.02726300  | -0.25647800 | -1.98860800 |
| C  | 3.25287400  | 0.84973800  | -1.57857300 |
| C  | 1.89667500  | 0.60537000  | -1.23392300 |
| C  | 2.07939800  | -1.65935900 | -1.71890500 |
| C  | 3.79442300  | 2.17321100  | -1.50966500 |
| C  | 1.09185000  | 1.70961900  | -0.75921000 |
| C  | 1.66043000  | 3.00918600  | -0.71673900 |
| C  | 3.02223700  | 3.21793600  | -1.10645900 |
| C  | 0.84741200  | 4.06639400  | -0.25757500 |
| C  | -0.44489600 | 3.80742100  | 0.13326200  |
| C  | -0.94795800 | 2.48913400  | 0.07980800  |
| H  | 4.83174000  | 2.32489200  | -1.79271200 |
| H  | 4.02044300  | -2.37018100 | -2.35383800 |
| H  | 3.42519200  | 4.22502600  | -1.06088900 |
| H  | -1.09253900 | 4.60272000  | 0.48619100  |
| N  | 1.32755700  | -0.62603800 | -1.32955600 |
| N  | -0.19064200 | 1.46917700  | -0.34987400 |
| H  | 1.25257800  | 5.07325600  | -0.21257500 |
| H  | 5.07048100  | -0.11212900 | -2.25496600 |
| Ni | -0.85713600 | -0.46174900 | -0.43724400 |
| C  | -1.86699100 | -1.97356100 | -1.04336400 |
| C  | -2.21032700 | -1.07334700 | -2.21954900 |
| H  | -1.19334200 | -2.78001700 | -1.32700800 |
| H  | -3.24633600 | -0.72769200 | -2.20970300 |
| H  | -1.58337100 | -0.13252400 | -2.23135500 |
| H  | -1.97145600 | -1.52696200 | -3.18576100 |
| C  | -3.03972100 | -2.53171400 | -0.23242200 |
| H  | -3.80850200 | -2.90106900 | -0.92431700 |
| H  | -2.70462900 | -3.40644400 | 0.33872400  |
| C  | -3.67812700 | -1.51372400 | 0.72806400  |
| H  | -3.80437500 | -0.55902300 | 0.20552900  |
| H  | -4.67652600 | -1.84561900 | 1.03315900  |
| C  | -2.85365000 | -1.28999300 | 2.00257200  |
| H  | -2.96218500 | -2.13048600 | 2.69327800  |
| H  | -3.15388300 | -0.37406700 | 2.51961600  |
| S  | -1.04699800 | -1.16559000 | 1.60953900  |
| C  | -0.45718700 | 0.07926000  | 2.84407500  |
| H  | -1.09872000 | 0.96245200  | 2.79111700  |
| H  | -0.59386100 | -0.39005200 | 3.82426200  |
| C  | 0.98680400  | 0.44023300  | 2.58415400  |
| C  | 1.95125800  | -0.53965800 | 2.30588600  |
| C  | 1.37631000  | 1.78388500  | 2.61947600  |
| C  | 3.27231400  | -0.17637400 | 2.04589000  |
| H  | 1.67030100  | -1.58841500 | 2.28073700  |

|   |             |             |             |
|---|-------------|-------------|-------------|
| C | 2.70199500  | 2.14553300  | 2.37688100  |
| H | 0.63781200  | 2.55325800  | 2.82649900  |
| C | 3.65190400  | 1.16735200  | 2.07974900  |
| H | 4.00515800  | -0.94442400 | 1.81817300  |
| H | 2.98832900  | 3.19223200  | 2.40718400  |
| H | 4.68006100  | 1.44980400  | 1.87674700  |
| C | -2.38666000 | 2.24210200  | 0.44787400  |
| C | -3.32271100 | 2.37922400  | -0.77095200 |
| H | -2.69029000 | 2.95926600  | 1.21893400  |
| H | -2.49289800 | 1.23954700  | 0.86780500  |
| C | -4.80439000 | 2.23942600  | -0.40385100 |
| H | -3.15422900 | 3.35117300  | -1.25190900 |
| H | -3.04727700 | 1.61814100  | -1.51082200 |
| C | -5.71748100 | 2.28125400  | -1.63255400 |
| H | -4.96082800 | 1.29821400  | 0.14005800  |
| H | -5.07920200 | 3.04136100  | 0.29359800  |
| H | -6.77009600 | 2.19194800  | -1.34923800 |
| H | -5.59734300 | 3.22141300  | -2.18135000 |
| H | -5.48627500 | 1.46222400  | -2.32346300 |
| C | 1.45367900  | -3.02825400 | -1.75758100 |
| C | 1.25148500  | -3.59641100 | -0.33962800 |
| H | 2.08241200  | -3.70560400 | -2.34455800 |
| H | 0.49074700  | -2.96476700 | -2.27330000 |
| C | 0.52556600  | -4.94503200 | -0.31947700 |
| H | 2.22925100  | -3.69470600 | 0.15087500  |
| H | 0.68311400  | -2.86753400 | 0.24563900  |
| C | 0.22691200  | -5.41768500 | 1.10650900  |
| H | -0.41527600 | -4.86127100 | -0.88114300 |
| H | 1.12666200  | -5.69626000 | -0.84735500 |
| H | -0.29563000 | -6.37876600 | 1.10915600  |
| H | 1.14952200  | -5.53828200 | 1.68504000  |
| H | -0.40110900 | -4.68964900 | 1.63429900  |

## TS2

Charge: 1, Spin: 1

|   |             |            |             |
|---|-------------|------------|-------------|
| C | 3.29015000  | 1.95244300 | -1.86262500 |
| C | 2.59050100  | 3.13642000 | -1.77828900 |
| C | 1.22952000  | 3.11113400 | -1.40689000 |
| C | 0.65914900  | 1.84480800 | -1.12475300 |
| C | 2.65378300  | 0.72650000 | -1.56320900 |
| C | 0.43070200  | 4.29396400 | -1.28994500 |
| C | -0.72532500 | 1.75664100 | -0.74784000 |
| C | -1.48186700 | 2.94621100 | -0.62821800 |
| C | -0.87429500 | 4.21357500 | -0.90781200 |
| C | -2.82746200 | 2.81891800 | -0.22424100 |
| C | -3.33560700 | 1.56962100 | 0.03822000  |
| C | -2.52872900 | 0.41550200 | -0.10374300 |
| H | 0.88841400  | 5.25446200 | -1.50642200 |
| H | 4.33342700  | 1.94424900 | -2.15962900 |
| H | -1.48063400 | 5.10904100 | -0.81127700 |
| H | -4.36307400 | 1.45012100 | 0.35837600  |
| N | 1.37134200  | 0.68590100 | -1.18166600 |
| N | -1.25148300 | 0.51280600 | -0.50531200 |
| H | -3.44517400 | 3.70600600 | -0.11792800 |

|    |             |             |             |
|----|-------------|-------------|-------------|
| H  | 3.07043000  | 4.08507400  | -2.00082000 |
| C  | -3.11102400 | -0.93498400 | 0.22740900  |
| C  | -4.49001000 | -1.23168000 | -0.41840500 |
| H  | -3.19644700 | -1.00211700 | 1.32002000  |
| H  | -2.38236000 | -1.69022800 | -0.05513000 |
| C  | -5.68573900 | -1.07878100 | 0.53300500  |
| H  | -4.63479100 | -0.59535600 | -1.30052400 |
| H  | -4.48312900 | -2.26152200 | -0.79492700 |
| C  | -7.02208900 | -1.37372400 | -0.15287300 |
| H  | -5.54599200 | -1.75591900 | 1.38611900  |
| H  | -5.70814400 | -0.06636700 | 0.95787300  |
| H  | -7.85847500 | -1.27322400 | 0.54483600  |
| H  | -7.19750100 | -0.68587500 | -0.98752800 |
| H  | -7.04222500 | -2.39316800 | -0.55371900 |
| C  | 3.42110200  | -0.56764300 | -1.64628100 |
| C  | 3.87660700  | -1.07835100 | -0.26643000 |
| H  | 4.29212300  | -0.43569500 | -2.29609800 |
| H  | 2.78176000  | -1.31882600 | -2.12133400 |
| C  | 4.48113100  | -2.48488900 | -0.31089000 |
| H  | 4.60056400  | -0.37296000 | 0.16213600  |
| H  | 3.00677000  | -1.07862500 | 0.39982800  |
| C  | 4.87580400  | -2.99665900 | 1.07751600  |
| H  | 3.75469600  | -3.17396400 | -0.76518700 |
| H  | 5.35651700  | -2.48977800 | -0.97233600 |
| H  | 5.30647500  | -4.00077200 | 1.02747700  |
| H  | 5.61557700  | -2.33877300 | 1.54587900  |
| H  | 4.00649400  | -3.04164300 | 1.74596000  |
| Ni | 0.16689100  | -0.89056000 | -0.56887800 |
| C  | -0.32920800 | -2.13216100 | -2.23701500 |
| C  | 0.45850700  | -2.87941100 | -1.33911200 |
| H  | 1.28820000  | -1.77423000 | -0.52563700 |
| H  | 0.21844000  | -1.69735000 | -3.07381900 |
| C  | -1.80239000 | -2.30322700 | -2.50788900 |
| H  | -2.31302100 | -1.33889800 | -2.58145900 |
| H  | -1.93478100 | -2.81384000 | -3.46985000 |
| H  | -2.31342300 | -2.89938300 | -1.75103400 |
| H  | 1.46690700  | -3.12772100 | -1.67472800 |
| C  | -0.06316600 | -3.81338700 | -0.25311300 |
| C  | 0.48555200  | -3.46429300 | 1.14678300  |
| H  | 0.23052500  | -4.84423600 | -0.48584700 |
| H  | -1.15608600 | -3.79338000 | -0.22155700 |
| H  | 0.12780400  | -4.17011100 | 1.89945700  |
| H  | 1.58031500  | -3.46343500 | 1.14988700  |
| S  | -0.09577800 | -1.75566600 | 1.56706300  |
| C  | 1.16826600  | -1.05929700 | 2.73854600  |
| H  | 2.16205000  | -1.38101000 | 2.41966400  |
| H  | 0.95946900  | -1.46631100 | 3.73154300  |
| C  | 1.01952300  | 0.44154900  | 2.68456600  |
| C  | -0.16401700 | 1.05144900  | 3.12801900  |
| C  | 2.01973600  | 1.23744400  | 2.11452700  |
| C  | -0.34957800 | 2.42586500  | 2.98275300  |
| H  | -0.94379600 | 0.44458400  | 3.58095800  |
| C  | 1.84051800  | 2.61535900  | 1.98242800  |
| H  | 2.94150200  | 0.77961000  | 1.77157900  |

|   |             |            |            |
|---|-------------|------------|------------|
| C | 0.65145700  | 3.21145000 | 2.40471100 |
| H | -1.27183500 | 2.88454800 | 3.32624900 |
| H | 2.62686200  | 3.21919700 | 1.54029400 |
| H | 0.50704000  | 4.28101900 | 2.28963000 |

## IM2

Charge: 1, Spin: 1

|    |             |             |             |
|----|-------------|-------------|-------------|
| C  | -2.74793200 | 1.88734000  | 2.17983000  |
| C  | -1.93376200 | 2.97908000  | 2.37086200  |
| C  | -0.61565500 | 2.95334100  | 1.86528100  |
| C  | -0.17753400 | 1.74709500  | 1.26782400  |
| C  | -2.26073100 | 0.73413500  | 1.51927100  |
| C  | 0.25566900  | 4.09030600  | 1.90019200  |
| C  | 1.12858000  | 1.69020500  | 0.67468100  |
| C  | 1.93393000  | 2.85256000  | 0.65171400  |
| C  | 1.48082900  | 4.04457800  | 1.30472100  |
| C  | 3.15258500  | 2.77652200  | -0.05756400 |
| C  | 3.47879700  | 1.60974100  | -0.70706400 |
| C  | 2.63976400  | 0.47099000  | -0.62077700 |
| H  | -0.09269100 | 4.99647200  | 2.38604800  |
| H  | -3.77875300 | 1.90370600  | 2.51450400  |
| H  | 2.12933600  | 4.91531700  | 1.30280600  |
| H  | 4.39095300  | 1.53446500  | -1.28792700 |
| N  | -0.97780900 | 0.64281700  | 1.14041100  |
| N  | 1.50443900  | 0.51392900  | 0.08915200  |
| H  | 3.80515300  | 3.64346000  | -0.10436900 |
| H  | -2.30307800 | 3.86996100  | 2.87047000  |
| C  | 3.03864300  | -0.79677200 | -1.32783500 |
| C  | 3.88669900  | -1.75480000 | -0.46072600 |
| H  | 3.61136300  | -0.52264000 | -2.22087200 |
| H  | 2.13603900  | -1.30901000 | -1.66588900 |
| C  | 5.24077700  | -1.19381400 | -0.01300800 |
| H  | 3.30338400  | -2.04361000 | 0.42057000  |
| H  | 4.04630700  | -2.67254500 | -1.04027200 |
| C  | 6.04287600  | -2.20676900 | 0.80982800  |
| H  | 5.82034100  | -0.89048900 | -0.89575500 |
| H  | 5.08667200  | -0.28363500 | 0.58127400  |
| H  | 7.00354100  | -1.79153600 | 1.12810800  |
| H  | 5.49278700  | -2.50445700 | 1.71000600  |
| H  | 6.24605300  | -3.11396600 | 0.23044500  |
| C  | -3.21855800 | -0.37516300 | 1.16410600  |
| C  | -4.46192400 | 0.09353100  | 0.38175500  |
| H  | -3.55098900 | -0.89114700 | 2.07501200  |
| H  | -2.67665200 | -1.09914300 | 0.55902200  |
| C  | -5.33456900 | -1.08851600 | -0.05919200 |
| H  | -5.06399600 | 0.77847600  | 0.98978300  |
| H  | -4.14776000 | 0.66694300  | -0.50013200 |
| C  | -6.56564400 | -0.64882300 | -0.85624500 |
| H  | -4.73113600 | -1.77955300 | -0.66550900 |
| H  | -5.64608000 | -1.65659500 | 0.82732200  |
| H  | -7.17231100 | -1.50847200 | -1.15484400 |
| H  | -7.20071100 | 0.01805100  | -0.26336000 |
| H  | -6.27612400 | -0.11097400 | -1.76583500 |
| Ni | 0.23422500  | -0.94484800 | 0.59227600  |



|   |             |             |             |
|---|-------------|-------------|-------------|
| C | 0.43150200  | -1.97430500 | 2.46203500  |
| C | -0.63995600 | -2.44703100 | 1.70740100  |
| H | 1.25062300  | -1.87330700 | 0.31203000  |
| H | 0.19081700  | -1.20069600 | 3.19228200  |
| C | 1.74669200  | -2.66775800 | 2.70863800  |
| H | 2.57378000  | -1.95260200 | 2.72921500  |
| H | 1.71582000  | -3.15914100 | 3.68956400  |
| H | 1.96965600  | -3.42736700 | 1.95699500  |
| H | -1.61381000 | -2.05681100 | 1.98233000  |
| C | -0.71554700 | -3.69726700 | 0.85265600  |
| C | -1.48281800 | -3.42623300 | -0.45919300 |
| H | -1.24439900 | -4.49164400 | 1.39668700  |
| H | 0.28258800  | -4.08002600 | 0.62183700  |
| H | -1.53579300 | -4.31802200 | -1.08766900 |
| H | -2.50241800 | -3.08834300 | -0.24994300 |
| S | -0.58515800 | -2.08203800 | -1.36244800 |
| C | -1.82621600 | -1.10558600 | -2.34024600 |
| H | -2.71612500 | -0.92487700 | -1.73431500 |
| H | -2.10323200 | -1.68824800 | -3.22245400 |
| C | -1.10678100 | 0.17370300  | -2.69302600 |
| C | -1.36829600 | 1.35853500  | -1.99519900 |
| C | -0.07446700 | 0.15997700  | -3.64274800 |
| C | -0.60319400 | 2.50276100  | -2.22330600 |
| H | -2.16471400 | 1.38331300  | -1.26000100 |
| C | 0.69466900  | 1.30147900  | -3.86935800 |
| H | 0.13445700  | -0.75324900 | -4.19362500 |
| C | 0.43804400  | 2.47367000  | -3.15304100 |
| H | -0.81809600 | 3.41399500  | -1.67272400 |
| H | 1.49074400  | 1.27707900  | -4.60736000 |
| H | 1.03745200  | 3.36172500  | -3.32857700 |

### TS3

Charge: 1, Spin: 1

|    |            |             |             |
|----|------------|-------------|-------------|
| C  | 1.59097600 | 4.21522000  | 0.65596600  |
| C  | 2.86940400 | 4.14633400  | 0.15341200  |
| C  | 3.35371400 | 2.90975300  | -0.32861100 |
| C  | 2.50146400 | 1.78920300  | -0.19312000 |
| C  | 0.78320500 | 3.05430300  | 0.74025600  |
| C  | 4.62934400 | 2.75731700  | -0.96432800 |
| C  | 2.90393400 | 0.52835800  | -0.74563900 |
| C  | 4.13351300 | 0.42459200  | -1.43606500 |
| C  | 5.00355300 | 1.56149000  | -1.50236000 |
| C  | 4.41469100 | -0.80973800 | -2.06308000 |
| C  | 3.48454000 | -1.82263500 | -2.00486200 |
| C  | 2.28190200 | -1.65972500 | -1.27492500 |
| H  | 5.28125000 | 3.62284900  | -1.03179400 |
| H  | 1.17370900 | 5.16074700  | 0.98520300  |
| H  | 5.95775500 | 1.45577200  | -2.00916800 |
| H  | 3.65648600 | -2.76371300 | -2.51447300 |
| N  | 1.25957700 | 1.85346400  | 0.38106700  |
| N  | 2.02269500 | -0.51211900 | -0.63348500 |
| H  | 5.34493300 | -0.93817800 | -2.60863300 |
| H  | 3.49462600 | 5.03233200  | 0.09259400  |
| Ni | 0.63735100 | -0.07183700 | 0.71906300  |

|   |             |             |             |
|---|-------------|-------------|-------------|
| C | -0.10295200 | 0.19011900  | 2.62405600  |
| C | 0.80905900  | -0.87589100 | 2.72167800  |
| H | 0.28478200  | 1.17528100  | 2.87131800  |
| H | 0.57400700  | -1.45590000 | 1.07774800  |
| H | 1.85120300  | -0.60239900 | 2.88922700  |
| C | -1.61113200 | 0.00891300  | 2.77497500  |
| H | -1.83662400 | -0.52799700 | 3.70580800  |
| H | -2.07857100 | 0.99316400  | 2.87191000  |
| C | -2.28385500 | -0.74429400 | 1.61771400  |
| H | -2.00322400 | -1.80091200 | 1.61301400  |
| H | -3.37274200 | -0.67771800 | 1.67562400  |
| C | 1.27458800  | -2.77664200 | -1.21515000 |
| C | 1.55296000  | -3.81921600 | -0.10928800 |
| H | 1.25658600  | -3.28306300 | -2.18733200 |
| H | 0.29015900  | -2.33119200 | -1.05457600 |
| C | 2.82116900  | -4.65791100 | -0.30432200 |
| H | 1.60703600  | -3.30207600 | 0.85485800  |
| H | 0.68370900  | -4.48664900 | -0.05457500 |
| C | 2.99061100  | -5.71157200 | 0.79463400  |
| H | 2.78527500  | -5.14910700 | -1.28633700 |
| H | 3.70110300  | -4.00247100 | -0.31754300 |
| H | 3.90018000  | -6.30020300 | 0.64483700  |
| H | 3.05708700  | -5.24255400 | 1.78322000  |
| H | 2.14258400  | -6.40477300 | 0.81141200  |
| C | -0.66445400 | 3.19675100  | 1.11258000  |
| C | -1.51937300 | 3.53013900  | -0.13172100 |
| H | -0.78444500 | 3.98431900  | 1.86480100  |
| H | -1.03294600 | 2.26888100  | 1.54091900  |
| C | -3.01839700 | 3.54819800  | 0.18504900  |
| H | -1.20702100 | 4.49732100  | -0.54586500 |
| H | -1.31920000 | 2.77606500  | -0.90247700 |
| C | -3.87617400 | 3.80712800  | -1.05633200 |
| H | -3.29756900 | 2.58157700  | 0.62342300  |
| H | -3.22212000 | 4.31159600  | 0.94751400  |
| H | -4.94163200 | 3.81178500  | -0.80797000 |
| H | -3.63465900 | 4.77223700  | -1.51484500 |
| H | -3.71284100 | 3.02944300  | -1.81129600 |
| C | 0.46560300  | -2.25701700 | 3.24521400  |
| H | 0.47858700  | -2.21442600 | 4.34142100  |
| H | 1.20261900  | -3.00279100 | 2.94038100  |
| H | -0.52092500 | -2.60455500 | 2.93564800  |
| S | -1.71173500 | -0.02757700 | 0.02237500  |
| C | -2.38628200 | -1.28772000 | -1.15326200 |
| H | -1.96475000 | -1.00747300 | -2.12310700 |
| H | -1.98504000 | -2.26716200 | -0.87652400 |
| C | -3.89144100 | -1.28478800 | -1.16840800 |
| C | -4.61025600 | -2.29532000 | -0.51868200 |
| C | -4.59210600 | -0.24412800 | -1.79534700 |
| C | -6.00675600 | -2.27087200 | -0.49894300 |
| H | -4.07620600 | -3.10934200 | -0.03421400 |
| C | -5.98465900 | -0.21797300 | -1.77550400 |
| H | -4.04045300 | 0.54812900  | -2.29507800 |
| C | -6.69559500 | -1.23200600 | -1.12588300 |
| H | -6.55376500 | -3.06338900 | 0.00270100  |

|   |             |             |             |
|---|-------------|-------------|-------------|
| H | -6.51672200 | 0.59009200  | -2.26835900 |
| H | -7.78097700 | -1.21252200 | -1.11248600 |

### IM3

Charge: 1, Spin: 1

|    |             |             |             |
|----|-------------|-------------|-------------|
| Ni | 0.51463600  | 0.23084400  | 0.11560900  |
| C  | 1.49014300  | -3.99269600 | -0.96078700 |
| C  | 3.20069600  | -0.38069500 | 0.17668000  |
| C  | 4.57654800  | -0.30839700 | 0.48889800  |
| C  | 5.13097800  | 0.98396600  | 0.62224400  |
| C  | 4.34310000  | 2.08776300  | 0.37525500  |
| C  | 2.96457000  | 1.94239700  | 0.09319600  |
| N  | 2.40508700  | 0.72248300  | 0.08563800  |
| H  | 6.18159300  | 1.09661800  | 0.87361900  |
| H  | 4.76645200  | 3.08564700  | 0.40008100  |
| C  | 2.60016200  | -1.64376600 | -0.14557900 |
| C  | 3.38744300  | -2.81463600 | -0.07120600 |
| C  | 2.77622200  | -4.02300400 | -0.47794900 |
| C  | 0.76772500  | -2.77272800 | -1.02247200 |
| N  | 1.30315000  | -1.62559000 | -0.59089800 |
| H  | 3.33587000  | -4.95288200 | -0.43558800 |
| H  | 1.01174600  | -4.89768100 | -1.31943000 |
| C  | -0.61878700 | -2.78185400 | -1.60232700 |
| C  | -1.63518300 | -3.54285600 | -0.72886800 |
| H  | -0.57497200 | -3.25839500 | -2.59033400 |
| H  | -0.94838100 | -1.75386600 | -1.76464400 |
| C  | -3.03864200 | -3.55637700 | -1.34807200 |
| H  | -1.29723000 | -4.57466200 | -0.57269200 |
| H  | -1.66058100 | -3.08707800 | 0.26995000  |
| C  | -4.09650400 | -4.14813800 | -0.41281100 |
| H  | -3.32383300 | -2.53308700 | -1.62798700 |
| H  | -3.00780400 | -4.12221700 | -2.28765900 |
| H  | -5.08052400 | -4.16806900 | -0.88963900 |
| H  | -3.84192400 | -5.17408100 | -0.12636500 |
| H  | -4.18601700 | -3.55981400 | 0.50796900  |
| C  | -1.73743300 | 2.17146400  | 0.10043600  |
| H  | -2.77620300 | 2.50427200  | 0.02710200  |
| H  | -1.13634700 | 2.72472700  | -0.62469800 |
| C  | -1.14865000 | 2.25020500  | 1.50429800  |
| H  | -0.93567700 | 3.30036600  | 1.73925100  |
| H  | -1.91105600 | 1.93303300  | 2.22531600  |
| C  | 0.02436500  | 0.38142800  | 2.82766800  |
| H  | -0.76850300 | -0.35696400 | 2.64716500  |
| H  | -0.30158100 | 0.94626900  | 3.71591600  |
| C  | 5.33225500  | -1.51987200 | 0.61314800  |
| H  | 6.37827900  | -1.45418100 | 0.89592900  |
| C  | 4.75443600  | -2.72784400 | 0.35423500  |
| H  | 5.33113200  | -3.64440500 | 0.43114000  |
| C  | -2.88182600 | -0.38769300 | 0.62993700  |
| H  | -2.51735200 | -0.33070200 | 1.65491800  |
| H  | -2.87048000 | -1.43013900 | 0.31760300  |
| C  | 1.67027100  | 5.57585800  | -2.29402600 |
| H  | 1.05490900  | 6.38152400  | -2.70460100 |
| H  | 1.98737600  | 5.88837300  | -1.29362500 |

|   |             |             |             |
|---|-------------|-------------|-------------|
| H | 2.56660400  | 5.49014600  | -2.91838600 |
| C | 2.13639200  | 3.13389600  | -0.31115200 |
| H | 2.71510400  | 4.04334000  | -0.13163000 |
| H | 1.23260500  | 3.19800000  | 0.29735700  |
| C | 1.71817000  | 3.04655300  | -1.79688100 |
| H | 1.13800800  | 2.12404400  | -1.93137300 |
| H | 2.61369100  | 2.94691500  | -2.42381700 |
| C | 0.89348500  | 4.25438100  | -2.26650700 |
| H | 0.00921300  | 4.36495100  | -1.62326800 |
| H | 0.51390900  | 4.03836000  | -3.27219400 |
| C | 0.12141100  | 1.37291800  | 1.65717900  |
| H | 0.99100000  | 2.00687300  | 1.84862400  |
| C | 1.32666800  | -0.35462100 | 3.16769700  |
| H | 1.23155200  | -0.90443900 | 4.10844000  |
| H | 1.59833600  | -1.07718200 | 2.39185000  |
| H | 2.15914400  | 0.35009800  | 3.27235000  |
| S | -1.62632200 | 0.42987900  | -0.48555600 |
| C | -4.24422800 | 0.22845400  | 0.48210000  |
| C | -4.98604900 | 0.04967100  | -0.69485500 |
| C | -4.78432600 | 1.00068700  | 1.51863600  |
| C | -6.24676500 | 0.62767200  | -0.82843200 |
| H | -4.57070800 | -0.53988600 | -1.50764100 |
| C | -6.04842700 | 1.57874400  | 1.38580400  |
| H | -4.22153500 | 1.13658300  | 2.43863900  |
| C | -6.78037800 | 1.39408700  | 0.21211600  |
| H | -6.81532900 | 0.47879900  | -1.74126700 |
| H | -6.46009700 | 2.16901300  | 2.19865000  |
| H | -7.76374300 | 1.84203400  | 0.10803100  |

#### Dioxazolone

Charge: 0, Spin: 1

|   |             |             |             |
|---|-------------|-------------|-------------|
| O | 3.75411700  | -0.96131300 | 0.00004200  |
| C | 2.75500200  | -0.31237400 | 0.00002700  |
| O | 1.46090200  | -0.80988200 | -0.00006800 |
| C | 0.64150400  | 0.27990200  | -0.00000100 |
| O | 2.64621800  | 1.04398000  | 0.00007400  |
| N | 1.27264600  | 1.40693200  | -0.00002400 |
| H | -1.22500400 | 2.20699800  | -0.00008600 |
| C | -1.65356500 | 1.21027900  | -0.00007000 |
| C | -0.80484700 | 0.09064900  | -0.00009200 |
| C | -1.34337100 | -1.20438100 | -0.00006300 |
| H | -0.68094300 | -2.06308800 | -0.00010100 |
| C | -2.72657600 | -1.37563000 | 0.00003600  |
| H | -3.14374700 | -2.37778000 | 0.00006600  |
| C | -3.57108900 | -0.26374600 | 0.00008500  |
| H | -4.64829800 | -0.40097000 | 0.00016400  |
| C | -3.03226300 | 1.02738000  | 0.00002500  |
| H | -3.68921600 | 1.89156100  | 0.00007200  |

#### PR2

Charge: 1, Spin: 1

|   |            |             |            |
|---|------------|-------------|------------|
| C | 2.60508100 | -3.67750100 | 0.27433800 |
| C | 3.64750700 | 0.35521200  | 0.50316500 |
| C | 5.00417000 | 0.73670900  | 0.62472700 |

|   |             |             |             |
|---|-------------|-------------|-------------|
| C | 5.28419000  | 2.12133500  | 0.63350800  |
| C | 4.25300500  | 3.02045100  | 0.47879400  |
| N | 2.62527000  | 1.26275100  | 0.44770300  |
| H | 6.30982300  | 2.46322000  | 0.73789400  |
| H | 4.44778800  | 4.08646000  | 0.44081800  |
| C | 3.31446400  | -1.04071400 | 0.40555600  |
| C | 4.33644500  | -2.01325400 | 0.50705500  |
| C | 3.93830300  | -3.36871500 | 0.42490500  |
| C | 1.64164800  | -2.64421400 | 0.17277500  |
| N | 2.00510800  | -1.35945100 | 0.20363300  |
| H | 4.68732700  | -4.15269000 | 0.49105700  |
| H | 2.27372900  | -4.70945100 | 0.22926100  |
| C | 0.17713300  | -2.96846600 | 0.11230200  |
| C | -0.33476100 | -3.47304600 | 1.47944500  |
| H | -0.01526700 | -3.72140200 | -0.66095400 |
| H | -0.37201300 | -2.06570800 | -0.16611600 |
| C | -1.86145900 | -3.57316800 | 1.51572100  |
| H | 0.11897700  | -4.44451300 | 1.71281200  |
| H | 0.00569300  | -2.78313500 | 2.26274400  |
| C | -2.40516600 | -3.94405200 | 2.89729400  |
| H | -2.28316000 | -2.61082200 | 1.20600800  |
| H | -2.19512700 | -4.30713100 | 0.76990400  |
| H | -3.49812100 | -4.00549500 | 2.88942500  |
| H | -2.02150700 | -4.91277000 | 3.23494000  |
| H | -2.11832800 | -3.19498800 | 3.64470300  |
| C | 6.01874300  | -0.27196300 | 0.72051700  |
| H | 7.05183700  | 0.04320300  | 0.82995600  |
| C | 5.69741000  | -1.59658700 | 0.67354000  |
| H | 6.46887300  | -2.35657000 | 0.75085500  |
| C | -0.11026500 | 4.32759500  | -3.26309800 |
| H | -0.97468800 | 4.95631300  | -3.49198400 |
| H | 0.71134400  | 4.62409400  | -3.92394400 |
| H | -0.37785800 | 3.29513700  | -3.52141200 |
| C | 1.81201400  | 3.54797000  | 0.07157600  |
| H | 2.12336700  | 4.55750900  | 0.35719100  |
| H | 0.92111800  | 3.29918200  | 0.64796600  |
| C | 1.45532000  | 3.51596500  | -1.43200400 |
| H | 1.19242800  | 2.48368300  | -1.69870600 |
| H | 2.34045500  | 3.77583000  | -2.02724600 |
| C | 0.29139000  | 4.44547500  | -1.78950700 |
| H | 0.56853200  | 5.48278300  | -1.56333700 |
| H | -0.56846400 | 4.20979600  | -1.15133500 |
| C | -0.13581900 | 1.27526500  | 1.71917300  |
| H | -0.63436000 | 2.18797500  | 1.38153200  |
| C | -1.17778100 | 0.17933200  | 1.96414000  |
| C | -2.12253300 | 0.46647300  | 3.15360500  |
| H | -0.68406400 | -0.77901900 | 2.16912900  |
| H | -1.80564500 | 0.03264200  | 1.08322800  |
| H | -2.75751400 | -0.40681000 | 3.33193900  |
| H | -1.55618200 | 0.64440500  | 4.07078800  |
| C | 1.46687600  | 0.35705800  | 3.54534800  |
| H | 2.07357600  | -0.17863000 | 2.80866600  |
| H | 2.12595100  | 0.66898900  | 4.36060600  |
| C | 0.76617300  | 1.57010900  | 2.91885500  |

|    |             |             |             |
|----|-------------|-------------|-------------|
| H  | 0.15191000  | 2.06030700  | 3.68993700  |
| H  | 1.51427600  | 2.31734400  | 2.64154400  |
| C  | 2.91533100  | 2.57232500  | 0.37338200  |
| H  | 0.74845700  | -0.35713000 | 3.95958300  |
| S  | -3.21474600 | 1.92447300  | 2.90399100  |
| C  | -4.78904500 | 1.08711000  | 2.41090200  |
| H  | -5.13081200 | 0.48160500  | 3.25522900  |
| H  | -5.49415000 | 1.91503500  | 2.29298000  |
| C  | -4.71944500 | 0.26056700  | 1.15229400  |
| C  | -4.72880100 | 0.87263100  | -0.11047800 |
| C  | -4.66695700 | -1.13763500 | 1.21855400  |
| C  | -4.70466400 | 0.10407700  | -1.27457200 |
| H  | -4.76360800 | 1.95587900  | -0.18219800 |
| C  | -4.62730600 | -1.91040100 | 0.05395000  |
| H  | -4.67762200 | -1.62950700 | 2.18802300  |
| C  | -4.64686500 | -1.29210400 | -1.19616700 |
| H  | -4.75052600 | 0.59627800  | -2.24110700 |
| H  | -4.59866700 | -2.99331500 | 0.12763400  |
| H  | -4.65306600 | -1.89201300 | -2.10205600 |
| C  | -1.01629300 | 0.10817200  | -2.16328800 |
| C  | -2.26229800 | 1.91308700  | -1.93850200 |
| O  | -3.04194200 | 2.78197900  | -2.14947200 |
| O  | -1.98475900 | 0.83239400  | -2.76828600 |
| O  | -1.44257000 | 1.78362000  | -0.85905300 |
| N  | -0.65434600 | 0.60726700  | -1.01743300 |
| C  | -0.49777800 | -1.08673300 | -2.81011300 |
| C  | -1.39456800 | -1.97315900 | -3.42872600 |
| C  | 0.88008200  | -1.34968700 | -2.80598400 |
| C  | -0.90741400 | -3.14012200 | -4.01025500 |
| H  | -2.45629800 | -1.75082600 | -3.42895700 |
| C  | 1.35650600  | -2.51856700 | -3.39366900 |
| H  | 1.56253400  | -0.64142500 | -2.35029000 |
| C  | 0.46447800  | -3.41480000 | -3.98938700 |
| H  | -1.59478200 | -3.83469000 | -4.48190200 |
| H  | 2.42187200  | -2.72512900 | -3.39574400 |
| H  | 0.83891500  | -4.32378600 | -4.44993800 |
| Ni | 0.83495100  | 0.44420100  | 0.25664800  |

#### TS4

Charge: 1, Spin: 1

|   |            |             |             |
|---|------------|-------------|-------------|
| C | 2.20294200 | 3.91794400  | 0.12102000  |
| C | 3.81361800 | 0.11136700  | -0.36762900 |
| C | 5.20035800 | -0.07346900 | -0.55358000 |
| C | 5.65287500 | -1.40926600 | -0.66809200 |
| C | 4.74964700 | -2.44555700 | -0.57870500 |
| N | 2.92599200 | -0.92389900 | -0.33179100 |
| H | 6.71051500 | -1.60777700 | -0.81559900 |
| H | 5.08032900 | -3.47611300 | -0.64473000 |
| C | 3.28600600 | 1.43348000  | -0.19369800 |
| C | 4.15238100 | 2.54547000  | -0.25278200 |
| C | 3.55992400 | 3.82027900  | -0.08655000 |
| C | 1.39141800 | 2.75608800  | 0.17750400  |
| N | 1.94156800 | 1.54408400  | 0.02557100  |
| H | 4.18121400 | 4.71055800  | -0.12200900 |

|   |             |             |             |
|---|-------------|-------------|-------------|
| H | 1.73097900  | 4.88528300  | 0.25191100  |
| C | -0.08761700 | 2.87577900  | 0.40818500  |
| C | -0.83948200 | 3.68229300  | -0.67018500 |
| H | -0.25462600 | 3.34192000  | 1.38613700  |
| H | -0.51081400 | 1.87478600  | 0.47201100  |
| C | -2.35757100 | 3.53257600  | -0.50628800 |
| H | -0.55918100 | 4.74182000  | -0.61946800 |
| H | -0.54163700 | 3.33976600  | -1.66991400 |
| C | -3.14975600 | 4.26639800  | -1.59004600 |
| H | -2.62019600 | 2.46725100  | -0.52294600 |
| H | -2.64858900 | 3.89706100  | 0.48764800  |
| H | -4.22645600 | 4.13201800  | -1.44951700 |
| H | -2.94345400 | 5.34203000  | -1.58018500 |
| H | -2.89513000 | 3.88849000  | -2.58710000 |
| C | 6.05909300  | 1.07335700  | -0.60756900 |
| H | 7.12269400  | 0.91834400  | -0.75955400 |
| C | 5.55398400  | 2.33422400  | -0.46859800 |
| H | 6.20851800  | 3.19911800  | -0.51203000 |
| C | 0.62923400  | -4.91256500 | 2.86377200  |
| H | 0.00186200  | -5.79984500 | 2.98541900  |
| H | 1.45232300  | -4.98011600 | 3.58432400  |
| H | 0.02088400  | -4.04034600 | 3.12967200  |
| C | 2.38379400  | -3.31181500 | -0.24867200 |
| H | 2.80019200  | -4.22173700 | -0.69224200 |
| H | 1.45528500  | -3.08130200 | -0.77790900 |
| C | 2.04350100  | -3.56542200 | 1.23949000  |
| H | 1.52897400  | -2.67823000 | 1.62802200  |
| H | 2.96999200  | -3.68114700 | 1.81743900  |
| C | 1.14749600  | -4.79460600 | 1.42792800  |
| H | 1.70952000  | -5.69716700 | 1.15447600  |
| H | 0.29803700  | -4.72342000 | 0.74133900  |
| C | 0.15921900  | -0.75969400 | -1.69851700 |
| H | -0.20284100 | -1.74393900 | -1.40238000 |
| C | -0.95996900 | 0.24643000  | -1.82909500 |
| C | -1.72193400 | 0.11456800  | -3.17311100 |
| H | -0.56049600 | 1.26281800  | -1.78304600 |
| H | -1.67132900 | 0.11890900  | -1.01285900 |
| H | -2.53626700 | 0.84430900  | -3.17388400 |
| H | -1.07161100 | 0.35188000  | -4.01785200 |
| C | 1.76671400  | 0.49823900  | -3.32275100 |
| H | 2.37352500  | 0.97848300  | -2.55368000 |
| H | 2.40781400  | 0.31519100  | -4.18902300 |
| C | 1.16638000  | -0.81900000 | -2.82406300 |
| H | 0.59890700  | -1.28693700 | -3.64783100 |
| H | 1.95387700  | -1.53737500 | -2.59411100 |
| C | 3.36679300  | -2.18780300 | -0.40834200 |
| H | 0.99648300  | 1.21162400  | -3.62803700 |
| S | -2.43025900 | -1.55369100 | -3.47780000 |
| C | -4.21551600 | -1.24569400 | -3.10001700 |
| H | -4.62219600 | -0.60201600 | -3.88485600 |
| H | -4.67069100 | -2.23395600 | -3.21307100 |
| C | -4.49838900 | -0.67391800 | -1.73552700 |
| C | -4.91224300 | 0.65835000  | -1.60112600 |
| C | -4.38778000 | -1.46884100 | -0.58443800 |

|    |             |             |             |
|----|-------------|-------------|-------------|
| C  | -5.24352700 | 1.17923500  | -0.34688700 |
| H  | -5.01104100 | 1.28271000  | -2.48598900 |
| C  | -4.72568200 | -0.95560200 | 0.66727300  |
| H  | -4.05561900 | -2.49962600 | -0.66691600 |
| C  | -5.16564300 | 0.36819100  | 0.78605400  |
| H  | -5.58715400 | 2.20622600  | -0.26280500 |
| H  | -4.65279800 | -1.59701000 | 1.53904200  |
| H  | -5.47058800 | 0.75577700  | 1.75448000  |
| C  | -1.15532500 | 0.61829900  | 2.72895900  |
| C  | -2.34376300 | 1.34029000  | 2.88969000  |
| C  | 0.04769700  | 1.08680700  | 3.27476600  |
| C  | -2.31879800 | 2.54592500  | 3.58836600  |
| H  | -3.26062600 | 0.96402500  | 2.45271500  |
| C  | 0.05873200  | 2.28263600  | 3.99133000  |
| H  | 0.95637500  | 0.50613700  | 3.14876100  |
| C  | -1.12224600 | 3.01558300  | 4.14115200  |
| H  | -3.23495700 | 3.11499400  | 3.71126000  |
| H  | 0.98290900  | 2.63912800  | 4.43533600  |
| H  | -1.11329400 | 3.94842300  | 4.69659700  |
| Ni | 1.07870800  | -0.31057400 | 0.10352400  |
| C  | -1.16635500 | -0.65157200 | 1.95324400  |
| O  | -2.01900500 | -1.56727200 | 2.29478600  |
| N  | -0.31914800 | -0.74889500 | 0.97829100  |
| C  | -2.01371400 | -2.80515100 | 1.32419200  |
| O  | -1.05019000 | -2.69113800 | 0.53215400  |
| O  | -2.90795100 | -3.57133000 | 1.53988900  |

## NI

Charge: 1, Spin: 1

|    |             |             |             |
|----|-------------|-------------|-------------|
| C  | -3.77248300 | 0.67116300  | -0.14549200 |
| C  | -5.16769700 | 0.77875700  | 0.03383800  |
| C  | -5.85467100 | -0.40403700 | 0.39474600  |
| H  | -6.92970200 | -0.37735500 | 0.54757300  |
| C  | -5.15302100 | -1.57851000 | 0.53999100  |
| H  | -5.66142500 | -2.49851400 | 0.80552700  |
| C  | -3.74655000 | -1.62012900 | 0.35632300  |
| C  | -3.01456000 | 1.81578400  | -0.54272700 |
| C  | -3.66598800 | 3.04705500  | -0.76173700 |
| C  | -2.85668100 | 4.11908100  | -1.20769300 |
| C  | -0.92374400 | 2.64203400  | -1.18179800 |
| C  | -1.51520000 | 3.91002400  | -1.42515900 |
| H  | -3.30399600 | 5.09140900  | -1.39274600 |
| H  | -0.88499500 | 4.71116300  | -1.79136400 |
| N  | -1.67122400 | 1.63132700  | -0.72211300 |
| N  | -3.08819800 | -0.49868300 | 0.02596200  |
| C  | 0.61515400  | -2.52662100 | 0.04989100  |
| O  | 0.19091900  | -3.11226000 | 1.06057100  |
| C  | -0.45333200 | -0.04256500 | 1.71853100  |
| H  | -0.15126900 | -1.06657500 | 1.94096300  |
| Ni | -1.14263500 | -0.27600100 | -0.24815800 |
| N  | -0.09972500 | -1.53084700 | -0.54518200 |
| C  | -3.00204000 | -2.91317200 | 0.48621900  |
| C  | -2.73263100 | -3.55712200 | -0.89544000 |



|   |             |             |             |
|---|-------------|-------------|-------------|
| H | -3.59166900 | -3.60115300 | 1.10059600  |
| H | -2.04397200 | -2.75317100 | 0.98872200  |
| C | -2.03332200 | -4.91709800 | -0.77005200 |
| H | -3.67824600 | -3.67097200 | -1.44215000 |
| H | -2.10551900 | -2.87369700 | -1.47968200 |
| C | -1.57759100 | -5.45772000 | -2.12868200 |
| H | -1.17082800 | -4.81678300 | -0.10288500 |
| H | -2.71734000 | -5.63083600 | -0.29247400 |
| H | -1.11074700 | -6.44181500 | -2.02632100 |
| H | -2.41927400 | -5.55701500 | -2.82340400 |
| H | -0.84215500 | -4.78671700 | -2.58789300 |
| C | 0.54518300  | 2.43975300  | -1.43857300 |
| C | 1.45144700  | 3.37917800  | -0.58942400 |
| H | 0.72871000  | 2.63115300  | -2.50375500 |
| H | 0.79751000  | 1.39028700  | -1.27431500 |
| C | 2.02656500  | 4.56998200  | -1.36593500 |
| H | 0.88996400  | 3.74979400  | 0.27736300  |
| H | 2.28376600  | 2.79286400  | -0.19015200 |
| C | 2.82557000  | 5.51541100  | -0.46621300 |
| H | 2.66727500  | 4.18430100  | -2.16858400 |
| H | 1.22325300  | 5.13085600  | -1.86230000 |
| H | 3.26810900  | 6.33439900  | -1.04064600 |
| H | 2.18706000  | 5.95607700  | 0.30786400  |
| H | 3.63553200  | 4.97851200  | 0.03725000  |
| C | 1.90422300  | -2.86994200 | -0.60411800 |
| C | 2.15311200  | -2.55672100 | -1.95091100 |
| C | 2.89374500  | -3.49697300 | 0.16867100  |
| C | 3.39410100  | -2.85293300 | -2.51278800 |
| H | 1.37257800  | -2.09273200 | -2.54473500 |
| C | 4.13300800  | -3.78361000 | -0.39698900 |
| H | 2.67257600  | -3.73553600 | 1.20298200  |
| C | 4.38590800  | -3.45651800 | -1.73455700 |
| H | 3.58796800  | -2.61873600 | -3.55496700 |
| H | 4.90346700  | -4.26253000 | 0.19947800  |
| H | 5.35474600  | -3.67930100 | -2.17123200 |
| C | -5.80313000 | 2.04745900  | -0.16672000 |
| C | -5.08000600 | 3.14072000  | -0.54984600 |
| H | -6.87596700 | 2.11909300  | -0.01761100 |
| H | -5.56751800 | 4.09688500  | -0.71216300 |
| C | 0.69842200  | 0.93267000  | 1.61616600  |
| C | 1.77034300  | 0.76110400  | 2.72548000  |
| H | 0.31352000  | 1.95868900  | 1.64223400  |
| H | 1.23052000  | 0.80564600  | 0.67343500  |
| H | 2.49603300  | 1.57257300  | 2.61795200  |
| H | 1.33552600  | 0.83283500  | 3.72183600  |
| C | -1.66980400 | 0.39175400  | 2.50813600  |
| H | -2.43111300 | -0.38874200 | 2.46294600  |
| S | 2.68148600  | -0.83061200 | 2.61614100  |
| C | 4.35021400  | -0.24446100 | 2.08046500  |
| H | 4.82562500  | 0.27155600  | 2.91903100  |
| H | 4.89732400  | -1.17931400 | 1.91873200  |
| C | 4.39447900  | 0.60858300  | 0.83399600  |
| C | 3.87950500  | 0.13371800  | -0.38127600 |
| C | 5.01701100  | 1.86275500  | 0.85666600  |

|   |             |             |             |
|---|-------------|-------------|-------------|
| C | 4.00766500  | 0.88123200  | -1.55020400 |
| H | 3.39653400  | -0.83371800 | -0.40646600 |
| C | 5.15637600  | 2.61058800  | -0.31738600 |
| H | 5.42486600  | 2.24409400  | 1.78940800  |
| C | 4.65600500  | 2.12092100  | -1.52457800 |
| H | 3.62034200  | 0.48234200  | -2.48354000 |
| H | 5.66718300  | 3.56828400  | -0.28830100 |
| H | 4.77733200  | 2.69572000  | -2.43782700 |
| H | -2.10030600 | 1.30414500  | 2.08102600  |
| C | -1.33517800 | 0.65104800  | 3.99576700  |
| H | -0.83098100 | -0.20853900 | 4.44711600  |
| H | -0.70212200 | 1.53256300  | 4.12222100  |
| H | -2.26394400 | 0.82598400  | 4.54667400  |

### NI'

Charge: 1, Spin: 1

|    |             |             |             |
|----|-------------|-------------|-------------|
| C  | -3.91343400 | 1.05609100  | 0.21398900  |
| C  | -5.08967700 | 1.82989300  | 0.13704800  |
| C  | -4.92802300 | 3.19452900  | -0.20054800 |
| H  | -5.79997500 | 3.83746200  | -0.27777200 |
| C  | -3.66378400 | 3.69762500  | -0.41389100 |
| H  | -3.51827000 | 4.74475800  | -0.65483900 |
| C  | -2.52070700 | 2.86283400  | -0.32479800 |
| C  | -3.98474200 | -0.31928400 | 0.59816700  |
| C  | -5.23298100 | -0.90119700 | 0.90215500  |
| C  | -5.21180800 | -2.24998200 | 1.32768000  |
| C  | -2.78679500 | -2.25182100 | 1.13685500  |
| C  | -4.00529700 | -2.90282500 | 1.45615800  |
| H  | -6.14301200 | -2.75464100 | 1.56805100  |
| H  | -3.96682900 | -3.92864000 | 1.80462100  |
| N  | -2.80179900 | -0.99258600 | 0.68408100  |
| N  | -2.67012000 | 1.56366700  | -0.03163500 |
| C  | 1.61601000  | 0.47503800  | 1.02552200  |
| O  | 2.09098800  | 1.61631000  | 0.89741100  |
| C  | -1.11037100 | 0.02738600  | -1.89430500 |
| H  | -1.23153900 | 1.08581700  | -2.13599600 |
| Ni | -1.24639100 | 0.20716800  | 0.17961600  |
| N  | 0.32695400  | 0.25714900  | 0.69585600  |
| C  | -1.14246300 | 3.43520400  | -0.48323800 |
| C  | -0.49314200 | 3.76477400  | 0.88200200  |
| H  | -1.20190500 | 4.34312300  | -1.09216400 |
| H  | -0.49483500 | 2.72734800  | -1.00690400 |
| C  | 0.84282200  | 4.49603600  | 0.71035000  |
| H  | -1.18265700 | 4.37483200  | 1.48038600  |
| H  | -0.33039500 | 2.82601900  | 1.42346900  |
| C  | 1.56959000  | 4.68874800  | 2.04296100  |
| H  | 1.47955500  | 3.91105700  | 0.03861900  |
| H  | 0.66334000  | 5.46730700  | 0.22995800  |
| H  | 2.49943600  | 5.24865300  | 1.90563100  |
| H  | 0.95140300  | 5.23812800  | 2.76232900  |
| H  | 1.82448300  | 3.71611600  | 2.47469400  |
| C  | -1.46846400 | -2.96213400 | 1.28752600  |
| C  | -0.90888400 | -3.49875700 | -0.04620500 |
| H  | -1.59743400 | -3.79010000 | 1.99147000  |

|   |             |             |             |
|---|-------------|-------------|-------------|
| H | -0.74207400 | -2.26671600 | 1.72202500  |
| C | -1.83610000 | -4.45318400 | -0.80518900 |
| H | -0.66453300 | -2.64333500 | -0.68302100 |
| H | 0.04015700  | -4.00324500 | 0.16762500  |
| C | -1.22469000 | -4.91428500 | -2.13176200 |
| H | -2.06166600 | -5.32289700 | -0.17417400 |
| H | -2.79922300 | -3.96108000 | -0.99875500 |
| H | -1.89263400 | -5.59796000 | -2.66318400 |
| H | -1.02617800 | -4.06097100 | -2.79121900 |
| H | -0.27402700 | -5.43303100 | -1.96951800 |
| C | 2.33149400  | -0.66090700 | 1.66475400  |
| C | 2.17787500  | -1.97397500 | 1.20057100  |
| C | 3.18518800  | -0.38746600 | 2.74222500  |
| C | 2.88361700  | -3.01022100 | 1.80748800  |
| H | 1.54728400  | -2.16529700 | 0.34102400  |
| C | 3.88531000  | -1.42762600 | 3.34849400  |
| H | 3.29598200  | 0.63758000  | 3.08082100  |
| C | 3.73454800  | -2.73797900 | 2.88261900  |
| H | 2.78701000  | -4.02516400 | 1.43375400  |
| H | 4.55100000  | -1.21940500 | 4.18029200  |
| H | 4.28719200  | -3.54564700 | 3.35289100  |
| C | -6.35124800 | 1.20840700  | 0.41878500  |
| C | -6.42044100 | -0.10513200 | 0.78691700  |
| H | -7.25249600 | 1.80905500  | 0.34630000  |
| H | -7.37756100 | -0.56486800 | 1.01238600  |
| C | 0.25396600  | -0.49905500 | -2.27696000 |
| C | 1.35143500  | 0.56866400  | -2.27571600 |
| H | 0.17684000  | -0.94210700 | -3.28072600 |
| H | 0.52842900  | -1.33046600 | -1.62215400 |
| H | 1.31040800  | 1.15908100  | -3.19776400 |
| H | 1.22349000  | 1.24816000  | -1.42883000 |
| C | -2.30334100 | -0.78622500 | -2.35219000 |
| H | -3.21759000 | -0.42538700 | -1.87904200 |
| S | 2.97570400  | -0.25195400 | -2.08939400 |
| C | 4.04749000  | 1.21838700  | -1.74967300 |
| H | 4.21233600  | 1.75710900  | -2.68738600 |
| H | 3.49848300  | 1.85752800  | -1.05215600 |
| C | 5.34076600  | 0.75019900  | -1.13648100 |
| C | 5.47160400  | 0.70420800  | 0.25763200  |
| C | 6.40417100  | 0.31600300  | -1.93751600 |
| C | 6.64569800  | 0.23050100  | 0.84112000  |
| H | 4.64604200  | 1.04529700  | 0.87390000  |
| C | 7.58079800  | -0.15592300 | -1.35382100 |
| H | 6.30825000  | 0.34736500  | -3.01999300 |
| C | 7.70315900  | -0.20151500 | 0.03681100  |
| H | 6.73522800  | 0.19886800  | 1.92333800  |
| H | 8.40160500  | -0.48616600 | -1.98368800 |
| H | 8.61949700  | -0.56788200 | 0.49031400  |
| H | -2.18388700 | -1.83642100 | -2.07291400 |
| C | -2.49461200 | -0.67065800 | -3.88311600 |
| H | -2.61028200 | 0.37411500  | -4.18900600 |
| H | -1.65289100 | -1.09557800 | -4.43519200 |
| H | -3.39827400 | -1.21155600 | -4.17835800 |

## T55

Charge: 1, Spin: 1

|    |             |             |             |
|----|-------------|-------------|-------------|
| C  | -3.81414300 | 0.61438300  | -0.11277100 |
| C  | -5.21269500 | 0.67336200  | 0.05148600  |
| C  | -5.85080900 | -0.52341800 | 0.45347400  |
| H  | -6.92648900 | -0.53794100 | 0.60303400  |
| C  | -5.10107900 | -1.66529000 | 0.63102000  |
| H  | -5.57481800 | -2.59790000 | 0.91616200  |
| C  | -3.69469500 | -1.65893400 | 0.44420800  |
| C  | -3.09523400 | 1.75976800  | -0.56601800 |
| C  | -3.78510200 | 2.95140100  | -0.86437700 |
| C  | -3.00836800 | 4.01361000  | -1.38387300 |
| C  | -1.02050900 | 2.61583500  | -1.21921100 |
| C  | -1.65585200 | 3.83616600  | -1.56875800 |
| H  | -3.48527400 | 4.95297100  | -1.64809400 |
| H  | -1.05047300 | 4.62931700  | -1.98941200 |
| N  | -1.74584400 | 1.60315100  | -0.72457800 |
| N  | -3.08036700 | -0.51622800 | 0.10121500  |
| C  | -2.89894000 | -2.92519700 | 0.55734500  |
| C  | -2.56792100 | -3.51017000 | -0.83774800 |
| H  | -3.47316200 | -3.65638600 | 1.13503400  |
| H  | -1.95814500 | -2.74752300 | 1.08702600  |
| C  | -1.85310500 | -4.86473300 | -0.74484100 |
| H  | -3.49018000 | -3.61340800 | -1.42472500 |
| H  | -1.93138700 | -2.79232100 | -1.36812500 |
| C  | -1.31553800 | -5.32530600 | -2.10326300 |
| H  | -1.02808200 | -4.78784800 | -0.02936300 |
| H  | -2.55005200 | -5.61220900 | -0.34380000 |
| H  | -0.84424400 | -6.30971900 | -2.02824100 |
| H  | -2.11503100 | -5.39302400 | -2.84985300 |
| H  | -0.56165700 | -4.62459900 | -2.48111300 |
| C  | 0.46853600  | 2.46047500  | -1.36161600 |
| C  | 1.26533100  | 3.35621100  | -0.36889900 |
| H  | 0.75679700  | 2.71737300  | -2.38799800 |
| H  | 0.73177300  | 1.40923200  | -1.22224700 |
| C  | 1.71749400  | 4.70672800  | -0.93486500 |
| H  | 0.66638600  | 3.52505900  | 0.53444200  |
| H  | 2.15369000  | 2.80259900  | -0.05380800 |
| C  | 2.47629800  | 5.53607000  | 0.10512200  |
| H  | 2.35863000  | 4.52344200  | -1.80615200 |
| H  | 0.85758700  | 5.28356300  | -1.29773300 |
| H  | 2.82638900  | 6.48260300  | -0.31691300 |
| H  | 1.83904600  | 5.76926000  | 0.96570200  |
| H  | 3.34828900  | 4.98792200  | 0.47581300  |
| C  | -5.88997900 | 1.90850800  | -0.21706200 |
| C  | -5.20367100 | 3.00375000  | -0.66038800 |
| H  | -6.96548900 | 1.95150800  | -0.07645000 |
| H  | -5.72555600 | 3.93016200  | -0.87884700 |
| C  | 0.71151000  | -2.47638100 | 0.19643600  |
| O  | 0.36976900  | -3.18684500 | 1.15516100  |
| C  | -0.12818200 | -0.30448200 | 1.90386600  |
| H  | 0.28208900  | -1.28113600 | 2.13720900  |
| Ni | -1.18865900 | -0.21864700 | -0.18014300 |

|   |             |             |             |
|---|-------------|-------------|-------------|
| N | 0.01430100  | -1.36003000 | -0.15638600 |
| C | -1.40925800 | -0.04264300 | 2.66199300  |
| C | -1.09722300 | 0.11794500  | 4.17122900  |
| H | -2.09044500 | -0.88626500 | 2.54135400  |
| H | -1.91640500 | 0.85903400  | 2.30315800  |
| H | -2.03800800 | 0.17818900  | 4.72609300  |
| H | -0.53082300 | -0.73595200 | 4.55467700  |
| H | -0.53096200 | 1.03081500  | 4.37132000  |
| C | 0.88080800  | 0.80645600  | 1.77690300  |
| C | 2.01829100  | 0.71971200  | 2.82637900  |
| H | 0.37454200  | 1.77404900  | 1.86741000  |
| H | 1.35928200  | 0.77291000  | 0.79886600  |
| H | 2.63452600  | 1.61897900  | 2.73535200  |
| H | 1.62403600  | 0.69240900  | 3.84317600  |
| S | 3.10894200  | -0.74594100 | 2.61439800  |
| C | 4.61779000  | 0.04141100  | 1.89682000  |
| H | 5.28469600  | -0.81178600 | 1.73197000  |
| H | 5.07994200  | 0.66870800  | 2.66422600  |
| C | 4.43233400  | 0.81677100  | 0.61242700  |
| C | 3.84534900  | 0.21706300  | -0.51141500 |
| C | 4.91343000  | 2.12778000  | 0.50254200  |
| C | 3.75214700  | 0.90714100  | -1.71860000 |
| H | 3.47547700  | -0.79775700 | -0.43683300 |
| C | 4.83578100  | 2.81626000  | -0.71277800 |
| H | 5.37702800  | 2.60465400  | 1.36251100  |
| C | 4.25390700  | 2.20875800  | -1.82632600 |
| H | 3.30719000  | 0.41492200  | -2.57830300 |
| H | 5.23325100  | 3.82393800  | -0.78717800 |
| H | 4.20002200  | 2.74048600  | -2.77176200 |
| C | 1.88552000  | -2.79273200 | -0.66022800 |
| C | 1.96895900  | -2.35286600 | -1.99127800 |
| C | 2.93296800  | -3.53691700 | -0.09724600 |
| C | 3.10206600  | -2.64683900 | -2.74807000 |
| H | 1.14461400  | -1.79257900 | -2.41927100 |
| C | 4.06876300  | -3.81388500 | -0.85379700 |
| H | 2.84077800  | -3.87028800 | 0.93058600  |
| C | 4.15524500  | -3.36733100 | -2.17714700 |
| H | 3.16544900  | -2.31819300 | -3.78096500 |
| H | 4.88687600  | -4.37784800 | -0.41651900 |
| H | 5.04158300  | -3.58640000 | -2.76487800 |

#### TS5'

Charge: 1, Spin: 1

|   |             |             |             |
|---|-------------|-------------|-------------|
| C | -4.13371100 | -0.10006800 | -0.06457200 |
| C | -5.50904900 | -0.39403700 | 0.06251500  |
| C | -5.84298300 | -1.61948500 | 0.68853100  |
| H | -6.88717200 | -1.88744800 | 0.82183000  |
| C | -4.84107300 | -2.45468600 | 1.12085100  |
| H | -5.07364700 | -3.39649400 | 1.60526000  |
| C | -3.47562800 | -2.11372300 | 0.92354400  |
| C | -3.72643200 | 1.14849000  | -0.64586200 |
| C | -4.70426000 | 2.02014300  | -1.17713100 |
| C | -4.23532800 | 3.18073800  | -1.83352100 |
| C | -1.95856900 | 2.53556700  | -1.29852000 |

|    |             |             |             |
|----|-------------|-------------|-------------|
| C  | -2.88179800 | 3.41517800  | -1.91633400 |
| H  | -4.94583100 | 3.86791100  | -2.28380300 |
| H  | -2.50167300 | 4.27848700  | -2.44842300 |
| N  | -2.38806600 | 1.43097700  | -0.67189100 |
| N  | -3.15082700 | -0.95796500 | 0.33525100  |
| C  | 0.46828400  | -2.04491400 | -0.91067200 |
| O  | -0.32812200 | -2.94575900 | -1.20086900 |
| C  | -0.73902900 | 0.56057400  | 1.83894200  |
| H  | -0.77784000 | -0.38773100 | 2.38690800  |
| Ni | -1.26755600 | -0.09745900 | 0.05157900  |
| N  | 0.13670000  | -1.14134300 | 0.06541400  |
| C  | -2.40070400 | -3.07246300 | 1.34765300  |
| C  | -2.42292500 | -4.37855400 | 0.52461100  |
| H  | -2.54423100 | -3.31024800 | 2.41051300  |
| H  | -1.42603600 | -2.59562500 | 1.23270400  |
| C  | -1.24418900 | -5.29158400 | 0.87622300  |
| H  | -3.36914600 | -4.91096200 | 0.69042700  |
| H  | -2.36943700 | -4.12019800 | -0.53654400 |
| C  | -1.22420500 | -6.56595600 | 0.02800600  |
| H  | -0.31588400 | -4.73100000 | 0.71458000  |
| H  | -1.28283400 | -5.55011000 | 1.94353200  |
| H  | -0.37994500 | -7.20891700 | 0.29575000  |
| H  | -2.14224900 | -7.14900400 | 0.16255900  |
| H  | -1.13575700 | -6.31966600 | -1.03564200 |
| C  | -0.48178900 | 2.83468100  | -1.33961700 |
| C  | -0.02093400 | 3.98325900  | -0.40796500 |
| H  | -0.20931500 | 3.08900600  | -2.37143300 |
| H  | 0.06298600  | 1.92105100  | -1.08370400 |
| C  | -0.46471300 | 5.39643700  | -0.80641600 |
| H  | -0.35784600 | 3.78160700  | 0.61600700  |
| H  | 1.07579400  | 3.95272400  | -0.38316100 |
| C  | 0.18395200  | 6.46984400  | 0.07398800  |
| H  | -0.20787300 | 5.57529800  | -1.85939200 |
| H  | -1.55520300 | 5.48232900  | -0.73013300 |
| H  | -0.14935400 | 7.47135100  | -0.21239500 |
| H  | -0.07262900 | 6.32196300  | 1.12902100  |
| H  | 1.27568200  | 6.44317900  | -0.01024900 |
| C  | 1.80644300  | -1.93617900 | -1.56606200 |
| C  | 2.33349500  | -0.69549100 | -1.94726500 |
| C  | 2.49907800  | -3.11629200 | -1.87252500 |
| C  | 3.54995100  | -0.63430400 | -2.62871800 |
| H  | 1.78610500  | 0.21455200  | -1.72499500 |
| C  | 3.72345200  | -3.05106000 | -2.53271000 |
| H  | 2.05891400  | -4.06902500 | -1.59650300 |
| C  | 4.24660400  | -1.81042200 | -2.91604400 |
| H  | 3.95368200  | 0.32724300  | -2.93006400 |
| H  | 4.26498900  | -3.96343600 | -2.76232800 |
| H  | 5.19340400  | -1.76343900 | -3.44614000 |
| C  | -6.48008300 | 0.53151400  | -0.43991700 |
| C  | -6.09221600 | 1.68725900  | -1.05314400 |
| H  | -7.53271400 | 0.28610300  | -0.33778100 |
| H  | -6.82888300 | 2.37498900  | -1.45658300 |
| C  | 0.67203400  | 1.13401200  | 1.82761500  |
| C  | 1.78459500  | 0.17430300  | 1.46180200  |

|   |             |             |             |
|---|-------------|-------------|-------------|
| H | 0.87729100  | 1.47470300  | 2.85490800  |
| H | 0.70943500  | 2.02852600  | 1.20194300  |
| H | 1.95708000  | -0.61523600 | 2.20012700  |
| H | 1.20774100  | -0.51639700 | 0.57567000  |
| C | -1.81814400 | 1.51182900  | 2.33634900  |
| H | -2.80072200 | 1.08409600  | 2.11499300  |
| S | 3.27200000  | 0.92191300  | 0.88804100  |
| C | 4.46312100  | -0.49890400 | 0.98633900  |
| H | 4.31260800  | -0.97209300 | 1.96139200  |
| H | 4.19677700  | -1.20584300 | 0.19719600  |
| C | 5.87036600  | 0.01460200  | 0.83057600  |
| C | 6.53886000  | -0.10560600 | -0.39339300 |
| C | 6.51968400  | 0.63478500  | 1.90735700  |
| C | 7.83975200  | 0.37924800  | -0.53720400 |
| H | 6.03957000  | -0.58790700 | -1.22767100 |
| C | 7.81829600  | 1.12038500  | 1.76375300  |
| H | 6.00443100  | 0.73393500  | 2.85958800  |
| C | 8.48095400  | 0.99348000  | 0.53982500  |
| H | 8.35292100  | 0.27484400  | -1.48854800 |
| H | 8.31476600  | 1.59352900  | 2.60550100  |
| H | 9.49373000  | 1.36873200  | 0.42859000  |
| H | -1.76223200 | 2.46351800  | 1.79896400  |
| C | -1.73138400 | 1.75825600  | 3.85590900  |
| H | -1.77532600 | 0.81533400  | 4.41093800  |
| H | -0.80546300 | 2.27124400  | 4.13286800  |
| H | -2.56740800 | 2.38200700  | 4.18561000  |

#### IM4

Charge: 1, Spin: 1

|    |             |             |             |
|----|-------------|-------------|-------------|
| C  | 3.59142400  | 0.68414700  | -0.32438300 |
| C  | 4.96935300  | 0.59956000  | -0.59767600 |
| C  | 5.40188800  | -0.54886600 | -1.30311200 |
| H  | 6.45306800  | -0.67092600 | -1.54713200 |
| C  | 4.47900500  | -1.49984600 | -1.67332400 |
| H  | 4.78744700  | -2.38951600 | -2.21118600 |
| C  | 3.09975900  | -1.35156800 | -1.36782600 |
| C  | 3.07453100  | 1.80754100  | 0.38223500  |
| C  | 3.92875600  | 2.84362700  | 0.80676800  |
| C  | 3.31531600  | 3.91821100  | 1.49275000  |
| C  | 1.15426000  | 2.82211300  | 1.25668100  |
| C  | 1.95268900  | 3.90158100  | 1.70871900  |
| H  | 3.91932300  | 4.75021800  | 1.84278000  |
| H  | 1.46664800  | 4.71963000  | 2.22807400  |
| N  | 1.73128900  | 1.80172600  | 0.60627000  |
| N  | 2.68009600  | -0.26499900 | -0.70531200 |
| C  | -1.05411900 | -1.81394600 | 0.03040300  |
| O  | -1.97070400 | -2.49854700 | -0.41853700 |
| C  | -1.19332400 | -0.47689700 | -1.97890200 |
| H  | -1.39416700 | -1.45267100 | -2.43773000 |
| Ni | 0.89577700  | 0.24331400  | -0.16901400 |
| N  | -0.53190600 | -0.71596600 | -0.67509000 |
| C  | 2.14072500  | -2.44333300 | -1.73905800 |
| C  | 2.19458600  | -3.61754700 | -0.73516300 |

|   |             |             |             |
|---|-------------|-------------|-------------|
| H | 2.39558200  | -2.81241600 | -2.73898000 |
| H | 1.12638500  | -2.04785900 | -1.77896700 |
| C | 1.19039800  | -4.71858700 | -1.09619600 |
| H | 3.21096800  | -4.03168900 | -0.71196100 |
| H | 1.98313500  | -3.23975500 | 0.27242600  |
| C | 1.29759600  | -5.93184900 | -0.16807200 |
| H | 0.17530300  | -4.30309300 | -1.05965800 |
| H | 1.35566800  | -5.03415300 | -2.13481000 |
| H | 0.54744100  | -6.68785200 | -0.41801000 |
| H | 2.28413600  | -6.40163200 | -0.24575700 |
| H | 1.14984200  | -5.64149400 | 0.87705500  |
| C | -0.33760400 | 2.79969300  | 1.45629700  |
| C | -1.12840700 | 2.98136900  | 0.14251700  |
| H | -0.61297800 | 3.58516800  | 2.16654100  |
| H | -0.63392600 | 1.84739400  | 1.91054000  |
| C | -0.90537200 | 4.32364800  | -0.55711500 |
| H | -0.86525300 | 2.16718900  | -0.54148500 |
| H | -2.18969700 | 2.84114900  | 0.37125500  |
| C | -1.68913000 | 4.41705000  | -1.87052100 |
| H | -1.20280800 | 5.13904800  | 0.11568400  |
| H | 0.16566900  | 4.46739400  | -0.75775900 |
| H | -1.54307800 | 5.38579800  | -2.35676800 |
| H | -1.36905300 | 3.63883400  | -2.57340400 |
| H | -2.76274400 | 4.28444400  | -1.69898700 |
| C | -0.44017600 | -2.15002600 | 1.35460700  |
| C | 0.16488100  | -1.20907600 | 2.20215900  |
| C | -0.51170600 | -3.48719600 | 1.77309900  |
| C | 0.74329100  | -1.60321400 | 3.40867600  |
| H | 0.11965700  | -0.15093200 | 1.96501100  |
| C | 0.06457200  | -3.88355600 | 2.97786300  |
| H | -1.01773000 | -4.20232200 | 1.13462300  |
| C | 0.70494600  | -2.94531300 | 3.79338500  |
| H | 1.19432400  | -0.86046200 | 4.05983200  |
| H | 0.01231700  | -4.92391400 | 3.28350200  |
| H | 1.14977200  | -3.25467800 | 4.73415700  |
| C | 5.82866500  | 1.66118900  | -0.15659500 |
| C | 5.32985500  | 2.74070100  | 0.51746700  |
| H | 6.89020400  | 1.59008800  | -0.37180300 |
| H | 5.98907700  | 3.53846200  | 0.84479000  |
| C | -2.55604600 | 0.23824100  | -1.71942900 |
| C | -3.75223500 | -0.52424100 | -2.29458600 |
| H | -2.53248800 | 1.25082000  | -2.13550100 |
| H | -2.69161000 | 0.35581100  | -0.64433100 |
| H | -3.69449500 | -0.57322100 | -3.38677700 |
| C | -0.28273800 | 0.32305800  | -2.92338200 |
| H | 0.69398500  | -0.17109300 | -2.99106500 |
| H | -0.09775000 | 1.32253600  | -2.50490400 |
| C | -0.87502200 | 0.46060600  | -4.33022600 |
| H | -1.82630400 | 1.00113500  | -4.31826600 |
| H | -0.19294800 | 1.00793000  | -4.98690100 |
| H | -1.05528400 | -0.52277800 | -4.77724300 |
| H | -3.75966100 | -1.55043800 | -1.91699900 |
| S | -5.36627600 | 0.26291300  | -1.91972000 |
| C | -5.68675200 | -0.39488200 | -0.22419700 |



|   |             |             |             |
|---|-------------|-------------|-------------|
| H | -5.65362000 | -1.48729200 | -0.27020200 |
| H | -6.72541100 | -0.10791200 | -0.03055200 |
| C | -4.78644500 | 0.12149500  | 0.87454400  |
| C | -4.78934700 | 1.48042500  | 1.22470900  |
| C | -3.94640600 | -0.75279000 | 1.57511800  |
| C | -3.98131500 | 1.95066100  | 2.25896200  |
| H | -5.42912800 | 2.16727700  | 0.67749000  |
| C | -3.13624400 | -0.28442100 | 2.61432000  |
| H | -3.91437700 | -1.80272100 | 1.29979800  |
| C | -3.15149800 | 1.06759500  | 2.96015000  |
| H | -4.01004100 | 3.00260500  | 2.53002300  |
| H | -2.50340300 | -0.97949000 | 3.15633600  |
| H | -2.53968000 | 1.42890300  | 3.78238400  |

#### IM4'

Charge: 1, Spin: 1

|    |             |             |             |
|----|-------------|-------------|-------------|
| C  | -3.65720500 | -0.70947100 | 0.05440500  |
| C  | -5.06443600 | -0.75745400 | -0.06850700 |
| C  | -5.67781100 | 0.26505100  | -0.82811500 |
| H  | -6.75543300 | 0.26080100  | -0.96384800 |
| C  | -4.90536600 | 1.27806500  | -1.34956600 |
| H  | -5.35938400 | 2.10497200  | -1.88437400 |
| C  | -3.49745000 | 1.25610000  | -1.20700500 |
| C  | -2.97931300 | -1.63978100 | 0.91631400  |
| C  | -3.73650100 | -2.64335800 | 1.56828700  |
| C  | -3.03651900 | -3.52196200 | 2.42445400  |
| C  | -0.99285400 | -2.32380000 | 1.91564700  |
| C  | -1.68082300 | -3.36037600 | 2.59251100  |
| H  | -3.57365100 | -4.30930600 | 2.94527500  |
| H  | -1.11950800 | -4.01843800 | 3.24627600  |
| N  | -1.63313500 | -1.47662800 | 1.09944600  |
| N  | -2.89881900 | 0.23084400  | -0.58147300 |
| C  | 0.86781200  | 1.81463100  | -0.17618600 |
| O  | 0.98750400  | 2.56476300  | -1.12733100 |
| C  | -0.68087000 | -0.24789300 | -2.43300500 |
| H  | -0.61733600 | 0.74270400  | -2.89870200 |
| Ni | -0.99905700 | -0.13398800 | -0.52039000 |
| N  | 0.94647300  | 0.37373500  | -0.37160400 |
| C  | -2.67837400 | 2.43775600  | -1.63909300 |
| C  | -2.56182800 | 3.44586800  | -0.46971000 |
| H  | -3.14962400 | 2.92438000  | -2.49932000 |
| H  | -1.67647600 | 2.12656300  | -1.93287500 |
| C  | -1.73425200 | 4.68137400  | -0.83903200 |
| H  | -3.56712500 | 3.75026100  | -0.14904400 |
| H  | -2.10059900 | 2.93720000  | 0.38717700  |
| C  | -1.67294400 | 5.69868300  | 0.30465400  |
| H  | -0.72204600 | 4.36068000  | -1.11063700 |
| H  | -2.16619600 | 5.15365300  | -1.73119300 |
| H  | -1.05875400 | 6.56243700  | 0.03208600  |
| H  | -2.67160400 | 6.06847600  | 0.56246200  |
| H  | -1.23948600 | 5.25070900  | 1.20522000  |
| C  | 0.50042500  | -2.20392600 | 2.06380500  |
| C  | 1.25330100  | -2.89143400 | 0.90417300  |
| H  | 0.80859300  | -2.65044200 | 3.01488900  |

|   |             |             |             |
|---|-------------|-------------|-------------|
| H | 0.77596700  | -1.14661000 | 2.11502200  |
| C | 1.08646800  | -4.41280700 | 0.84295300  |
| H | 0.90596700  | -2.45423500 | -0.03862000 |
| H | 2.31634100  | -2.64101000 | 0.98211000  |
| C | 1.85591700  | -5.02439600 | -0.33216600 |
| H | 1.43454600  | -4.85391800 | 1.78668400  |
| H | 0.02251100  | -4.66924400 | 0.75693300  |
| H | 1.73715800  | -6.11125700 | -0.36335500 |
| H | 1.49894000  | -4.62215200 | -1.28738400 |
| H | 2.92631000  | -4.80442800 | -0.26092400 |
| C | 0.66919300  | 2.30667400  | 1.21336000  |
| C | 0.01796400  | 1.56886900  | 2.21516800  |
| C | 1.13782500  | 3.59955900  | 1.49765500  |
| C | -0.15406700 | 2.11695900  | 3.48502400  |
| H | -0.40231500 | 0.59321300  | 1.99822800  |
| C | 0.98085900  | 4.13453100  | 2.77339300  |
| H | 1.62049000  | 4.16647300  | 0.70930700  |
| C | 0.33434100  | 3.39498600  | 3.76836400  |
| H | -0.67366700 | 1.54944000  | 4.25079300  |
| H | 1.35591300  | 5.12943900  | 2.99071900  |
| H | 0.20570900  | 3.81667300  | 4.76043100  |
| C | -5.79601300 | -1.80158500 | 0.58516000  |
| C | -5.15363500 | -2.71692200 | 1.36469600  |
| H | -6.87303600 | -1.84122000 | 0.45503100  |
| H | -5.70792000 | -3.50564600 | 1.86399700  |
| C | 0.70255700  | -0.91008300 | -2.45019500 |
| C | 1.65657000  | -0.03580100 | -1.64820200 |
| H | 1.08863700  | -1.02347200 | -3.47055300 |
| H | 0.64639200  | -1.92066200 | -2.02477800 |
| H | 1.83195300  | 0.89188300  | -2.19404200 |
| H | 1.38859100  | -0.07750300 | 0.42974800  |
| C | -1.77170800 | -1.09182400 | -3.08883000 |
| H | -2.72242000 | -0.55264500 | -3.04714800 |
| S | 3.25941200  | -0.81837300 | -1.29232900 |
| C | 4.24467200  | 0.69645600  | -0.86392000 |
| H | 4.29637000  | 1.32903800  | -1.75430500 |
| H | 3.71339600  | 1.24583900  | -0.07999900 |
| C | 5.61234300  | 0.27948500  | -0.39362800 |
| C | 5.85582300  | 0.05216800  | 0.96699700  |
| C | 6.64830100  | 0.07954400  | -1.31502100 |
| C | 7.11597100  | -0.35750900 | 1.40187900  |
| H | 5.05526800  | 0.20335400  | 1.68777000  |
| C | 7.90905300  | -0.33110000 | -0.88171800 |
| H | 6.46505700  | 0.24869000  | -2.37294900 |
| C | 8.14508000  | -0.55010900 | 0.47726500  |
| H | 7.29638000  | -0.52276800 | 2.45989100  |
| H | 8.70680000  | -0.47715900 | -1.60361400 |
| H | 9.12740800  | -0.86633400 | 0.81475700  |
| H | -1.91591600 | -2.01658300 | -2.51113300 |
| C | -1.47928500 | -1.45297100 | -4.55728600 |
| H | -1.29482300 | -0.55093700 | -5.15107000 |
| H | -0.60480100 | -2.10311600 | -4.65253400 |
| H | -2.33057100 | -1.97908300 | -5.00003700 |

**HOBpin**

Charge: 0, Spin: 1

|   |             |             |             |
|---|-------------|-------------|-------------|
| O | 0.87888800  | -1.03412500 | 0.41997300  |
| O | 0.79939600  | 1.10598000  | -0.43971700 |
| C | -0.50728000 | -0.79750400 | 0.04997700  |
| C | -0.55845800 | 0.77568500  | -0.04767100 |
| C | -0.80947800 | 1.44976000  | 1.30667900  |
| H | -0.61962600 | 2.52150400  | 1.20695800  |
| H | -1.84003500 | 1.30678500  | 1.64436500  |
| H | -0.13329300 | 1.05496900  | 2.07025000  |
| C | -1.51708200 | 1.32407700  | -1.09984200 |
| H | -2.54602700 | 1.02072300  | -0.88028000 |
| H | -1.47557200 | 2.41677800  | -1.10045800 |
| H | -1.25325100 | 0.97696800  | -2.10009700 |
| C | -1.40993000 | -1.40834500 | 1.11674500  |
| H | -2.45951200 | -1.17053400 | 0.91521500  |
| H | -1.30039200 | -2.49653400 | 1.11401100  |
| H | -1.15273100 | -1.04585100 | 2.11329400  |
| C | -0.73097800 | -1.48799100 | -1.30038300 |
| H | -0.46828000 | -2.54489900 | -1.20462700 |
| H | -1.77369100 | -1.41631300 | -1.62287200 |
| H | -0.09547000 | -1.04718200 | -2.07359900 |
| B | 1.59091900  | 0.06628300  | -0.01592100 |
| O | 2.94970200  | 0.13538600  | -0.03115400 |
| H | 3.33863300  | -0.69985100 | 0.25159400  |

**IM5**

Charge: 1, Spin: 1

|    |             |             |             |
|----|-------------|-------------|-------------|
| C  | -1.10982000 | 3.35173400  | 0.56654100  |
| C  | -1.36249400 | 4.52173600  | 1.31344500  |
| C  | -2.51033100 | 4.51532700  | 2.13679300  |
| H  | -2.75052500 | 5.38639800  | 2.73943600  |
| C  | -3.33012900 | 3.41264000  | 2.13152000  |
| H  | -4.24007800 | 3.39961200  | 2.72040400  |
| C  | -3.01217800 | 2.25502500  | 1.37368300  |
| C  | -0.03703100 | 3.34758400  | -0.38016600 |
| C  | 0.75328800  | 4.49969200  | -0.56553500 |
| C  | 1.68671800  | 4.45695900  | -1.62570400 |
| C  | 0.93988400  | 2.20634400  | -2.17399000 |
| C  | 1.74094100  | 3.34730600  | -2.43824700 |
| H  | 2.31655600  | 5.31934300  | -1.82422300 |
| H  | 2.38497600  | 3.33936800  | -3.30750700 |
| N  | 0.10514600  | 2.21454600  | -1.12621400 |
| N  | -1.88765000 | 2.22169700  | 0.63648500  |
| C  | -2.21061700 | -1.73708200 | 0.30369600  |
| O  | -2.46259200 | -2.74979900 | 0.97957100  |
| C  | -0.99802400 | -0.94599400 | 2.20824200  |
| H  | -1.82501400 | -1.40231700 | 2.76517500  |
| Ni | -0.78371100 | 0.73505700  | -0.12410900 |
| N  | -1.51331100 | -0.68965200 | 0.83542900  |
| C  | -3.96774400 | 1.10096800  | 1.37612400  |
| C  | -4.74214200 | 0.98355400  | 0.04620100  |
| H  | -4.67319900 | 1.22672000  | 2.20294300  |
| H  | -3.41014800 | 0.17995500  | 1.53969900  |

|   |             |             |             |
|---|-------------|-------------|-------------|
| C | -5.67080400 | -0.23575500 | 0.03324300  |
| H | -5.32222600 | 1.89948400  | -0.12811700 |
| H | -4.02317400 | 0.90497400  | -0.77531100 |
| C | -6.34133600 | -0.44027700 | -1.32757500 |
| H | -5.09216500 | -1.12984800 | 0.29463200  |
| H | -6.43203100 | -0.11903500 | 0.81577400  |
| H | -7.01339000 | -1.30341700 | -1.30987500 |
| H | -6.93173300 | 0.43679300  | -1.61601600 |
| H | -5.59259800 | -0.61690100 | -2.10639000 |
| C | 0.93318900  | 1.03625800  | -3.12990600 |
| C | 2.23963800  | 0.23134500  | -3.32438100 |
| H | 0.64023900  | 1.44482200  | -4.10727300 |
| H | 0.13997600  | 0.34920600  | -2.83081500 |
| C | 3.43933100  | 0.96406000  | -3.93704500 |
| H | 2.54230400  | -0.22948400 | -2.38039700 |
| H | 1.97789300  | -0.59954900 | -3.99025500 |
| C | 4.57006200  | -0.00697300 | -4.29337700 |
| H | 3.12205800  | 1.50781000  | -4.83741200 |
| H | 3.82426300  | 1.71575800  | -3.23745400 |
| H | 5.43652600  | 0.52211000  | -4.70008200 |
| H | 4.90180500  | -0.56266800 | -3.40948500 |
| H | 4.24153000  | -0.73716600 | -5.04045300 |
| C | -2.69998800 | -1.71100600 | -1.13119400 |
| C | -2.43759200 | -0.71329000 | -2.07826800 |
| C | -3.44004900 | -2.82902600 | -1.54896200 |
| C | -2.86215400 | -0.83317000 | -3.40241600 |
| H | -1.91474800 | 0.20113200  | -1.80489100 |
| C | -3.87476500 | -2.95438500 | -2.86674600 |
| H | -3.65194200 | -3.59791600 | -0.81513700 |
| C | -3.57802800 | -1.96164300 | -3.80481400 |
| H | -2.64098400 | -0.04175400 | -4.11274700 |
| H | -4.44374500 | -3.83001900 | -3.16390300 |
| H | -3.91045600 | -2.06077800 | -4.83357400 |
| C | -0.49114600 | 5.65206900  | 1.17221600  |
| C | 0.52982400  | 5.64394000  | 0.26687000  |
| H | -0.68221900 | 6.52950300  | 1.78220700  |
| H | 1.16642900  | 6.51400300  | 0.14031800  |
| C | 0.17488600  | -1.96446800 | 2.16973800  |
| C | -0.01117400 | -3.15823300 | 3.10730000  |
| H | 1.12692800  | -1.47029600 | 2.39544400  |
| H | 0.26037200  | -2.34665700 | 1.15718200  |
| H | -0.05174500 | -2.84464300 | 4.15502200  |
| C | -0.61214200 | 0.34788500  | 2.94212900  |
| H | -1.46293800 | 1.03348500  | 2.93584600  |
| H | 0.20531500  | 0.85304300  | 2.41112300  |
| C | -0.19906500 | 0.10367600  | 4.39762100  |
| H | 0.69217800  | -0.52605900 | 4.47485200  |
| H | 0.02497200  | 1.04964400  | 4.90025100  |
| H | -1.00162100 | -0.38945500 | 4.95653500  |
| H | -0.95416100 | -3.66036200 | 2.87199400  |
| S | 1.35732900  | -4.37972400 | 3.02086300  |
| C | 0.90599900  | -5.30434300 | 1.48763200  |
| H | -0.10568500 | -5.70074100 | 1.61193100  |
| H | 1.59400700  | -6.15605300 | 1.48775700  |

|   |             |             |             |
|---|-------------|-------------|-------------|
| C | 1.02118200  | -4.53708300 | 0.18999600  |
| C | 2.25700400  | -4.02561400 | -0.23277600 |
| C | -0.11166100 | -4.30948300 | -0.60243700 |
| C | 2.36409200  | -3.31814300 | -1.42813100 |
| H | 3.13123600  | -4.16273500 | 0.39620000  |
| C | -0.01108700 | -3.59903100 | -1.80233800 |
| H | -1.08359100 | -4.65206200 | -0.26305400 |
| C | 1.22771000  | -3.10206300 | -2.21966300 |
| H | 3.32569300  | -2.92116600 | -1.73620000 |
| H | -0.89524600 | -3.43654700 | -2.40839700 |
| H | 1.31157300  | -2.57530700 | -3.16467100 |
| O | 3.14319500  | -0.84784000 | 0.22712000  |
| O | 2.16269800  | 1.17585900  | 0.72929100  |
| C | 3.44509500  | 1.18446300  | 1.44340400  |
| C | 4.22771500  | -0.01229900 | 0.75727400  |
| B | 2.04545700  | -0.05822700 | 0.16009100  |
| O | 0.86352000  | -0.41028200 | -0.48021200 |
| H | 0.81246700  | -1.32939300 | -0.81073600 |
| C | 4.06983000  | 2.56126800  | 1.24684200  |
| H | 3.44729700  | 3.31562000  | 1.73596300  |
| H | 5.06715500  | 2.60063100  | 1.69411300  |
| H | 4.14705700  | 2.81993500  | 0.18941300  |
| C | 3.13358800  | 0.94381900  | 2.92107900  |
| H | 4.04134600  | 0.99261100  | 3.52746900  |
| H | 2.44114500  | 1.71307200  | 3.27205700  |
| H | 2.66431200  | -0.02914700 | 3.07881800  |
| C | 5.05448200  | -0.87099700 | 1.70583600  |
| H | 5.54122300  | -1.67085600 | 1.14210100  |
| H | 5.83279600  | -0.27289900 | 2.18915400  |
| H | 4.43187400  | -1.33266700 | 2.47307100  |
| C | 5.06040700  | 0.42156200  | -0.45009600 |
| H | 5.92447000  | 1.01781700  | -0.14677700 |
| H | 5.42150200  | -0.46873300 | -0.97028200 |
| H | 4.46121300  | 1.00613200  | -1.15268700 |

#### IM5'

Charge: 1, Spin: 1

|   |             |             |             |
|---|-------------|-------------|-------------|
| C | -2.10897200 | 1.92462400  | 0.96027700  |
| C | -2.20022500 | 3.32368100  | 0.80291100  |
| C | -1.54182000 | 3.88579000  | -0.31467100 |
| H | -1.56901500 | 4.95986600  | -0.47359300 |
| C | -0.92747800 | 3.05406000  | -1.22022500 |
| H | -0.47008300 | 3.45502700  | -2.11678200 |
| C | -0.87707900 | 1.65240700  | -1.00689600 |
| C | -2.87274500 | 1.27645100  | 1.98665200  |
| C | -3.70398700 | 2.04532500  | 2.83216100  |
| C | -4.49555000 | 1.33621300  | 3.76302900  |
| C | -3.57065700 | -0.74431500 | 2.92196400  |
| C | -4.43454100 | -0.03894200 | 3.79409800  |
| H | -5.15311400 | 1.87908900  | 4.43584100  |
| H | -5.04814400 | -0.60309300 | 4.48729500  |
| N | -2.80141800 | -0.08478300 | 2.04671800  |
| N | -1.39687000 | 1.11806800  | 0.10907500  |
| C | 4.39534300  | 0.97222600  | 0.26946200  |

|    |             |             |             |
|----|-------------|-------------|-------------|
| O  | 3.73592400  | 1.39504700  | -0.68668700 |
| C  | 0.41392200  | -1.36240800 | 0.38380300  |
| H  | 0.53816600  | -1.65381900 | -0.66194500 |
| Ni | -1.29178200 | -0.66927300 | 0.88047600  |
| N  | 4.02220200  | -0.16020400 | 0.93260900  |
| C  | -0.30209100 | 0.76355100  | -2.07403300 |
| C  | 1.10547400  | 1.15869800  | -2.55666000 |
| H  | -1.01051300 | 0.77732900  | -2.91490900 |
| H  | -0.29800600 | -0.25468400 | -1.69481300 |
| C  | 1.75547300  | 0.05968400  | -3.40579000 |
| H  | 1.05514500  | 2.08301100  | -3.14629300 |
| H  | 1.75404000  | 1.36586400  | -1.70171800 |
| C  | 3.13833100  | 0.47235300  | -3.92102900 |
| H  | 1.84776500  | -0.85077400 | -2.79472400 |
| H  | 1.09983100  | -0.20386100 | -4.24741900 |
| H  | 3.61450300  | -0.33992100 | -4.48018100 |
| H  | 3.06227100  | 1.33461600  | -4.59270800 |
| H  | 3.78662100  | 0.75575100  | -3.08653100 |
| C  | -3.52500200 | -2.25128500 | 2.94677000  |
| C  | -4.04524700 | -2.90061300 | 1.64684500  |
| H  | -4.11438400 | -2.60714100 | 3.79760100  |
| H  | -2.49194700 | -2.56943400 | 3.13308200  |
| C  | -5.51296200 | -2.57794500 | 1.34564600  |
| H  | -3.42761700 | -2.57380800 | 0.80457500  |
| H  | -3.91330300 | -3.98621300 | 1.73484700  |
| C  | -6.00064900 | -3.25935700 | 0.06464200  |
| H  | -6.13930100 | -2.88506300 | 2.19429200  |
| H  | -5.62599900 | -1.49364800 | 1.23671900  |
| H  | -7.04317500 | -3.00396500 | -0.15058300 |
| H  | -5.39296800 | -2.94369200 | -0.78938600 |
| H  | -5.93408000 | -4.35025300 | 0.14088400  |
| C  | 5.61770300  | 1.68090700  | 0.76055900  |
| C  | 6.60462600  | 1.06206200  | 1.54124800  |
| C  | 5.77977700  | 3.02031600  | 0.38122900  |
| C  | 7.72741600  | 1.77993500  | 1.94992600  |
| H  | 6.53727300  | 0.00711700  | 1.78710800  |
| C  | 6.89927900  | 3.73807900  | 0.79515500  |
| H  | 5.01785300  | 3.47506000  | -0.24257200 |
| C  | 7.87359300  | 3.11998500  | 1.58379300  |
| H  | 8.49325200  | 1.29044200  | 2.54393700  |
| H  | 7.01531300  | 4.77713400  | 0.50197400  |
| H  | 8.74831600  | 3.67788300  | 1.90472200  |
| C  | -2.99765200 | 4.08743200  | 1.71683400  |
| C  | -3.72620100 | 3.47168800  | 2.69207300  |
| H  | -3.03289100 | 5.16579100  | 1.59664800  |
| H  | -4.34953300 | 4.05039000  | 3.36674200  |
| C  | 1.56908700  | -0.52909200 | 0.90727400  |
| C  | 2.95744200  | -1.01384200 | 0.43112000  |
| H  | 1.54907300  | -0.49216800 | 2.00319600  |
| H  | 1.49127800  | 0.50617000  | 0.55827000  |
| H  | 2.97755000  | -0.95403600 | -0.66136400 |
| H  | 4.54996100  | -0.49081000 | 1.72538300  |
| C  | -0.13702600 | -2.44902500 | 1.23367200  |
| H  | -1.18308000 | -2.09675900 | 1.65643200  |

|   |             |             |             |
|---|-------------|-------------|-------------|
| S | 3.26523300  | -2.76219500 | 0.91134200  |
| C | 4.35755200  | -3.30815400 | -0.49122000 |
| H | 4.61504600  | -4.33767600 | -0.22593100 |
| H | 3.74237200  | -3.33859500 | -1.39471700 |
| C | 5.58661900  | -2.46589900 | -0.70060600 |
| C | 5.61562600  | -1.50133400 | -1.71441000 |
| C | 6.71071200  | -2.61852900 | 0.12361200  |
| C | 6.73845800  | -0.69163700 | -1.89540100 |
| H | 4.75476800  | -1.37657800 | -2.36501200 |
| C | 7.83858300  | -1.82099400 | -0.06509500 |
| H | 6.69795000  | -3.36626000 | 0.91273500  |
| C | 7.85271200  | -0.85028500 | -1.07161500 |
| H | 6.73782800  | 0.06205000  | -2.67675000 |
| H | 8.70708200  | -1.95370400 | 0.57351100  |
| H | 8.72577600  | -0.21980300 | -1.20729200 |
| H | 0.40108400  | -2.56598300 | 2.17899000  |
| C | -0.44081400 | -3.78960000 | 0.56475900  |
| H | -1.04709400 | -3.64347300 | -0.33251700 |
| H | 0.50486200  | -4.26163900 | 0.28687000  |
| H | -0.98491400 | -4.46191200 | 1.23401700  |
| O | -3.59939000 | -0.28480900 | -2.91513400 |
| O | -4.49125100 | -0.33611500 | -0.78838700 |
| C | -5.28284000 | 0.64502600  | -1.52813400 |
| C | -4.93756700 | 0.29932700  | -3.03145600 |
| B | -3.51160400 | -0.77129600 | -1.63771100 |
| O | -2.53084900 | -1.63547900 | -1.21944700 |
| H | -1.94226100 | -1.87289600 | -1.94561400 |
| C | -6.74588800 | 0.46050100  | -1.14350700 |
| H | -6.88273500 | 0.71800400  | -0.08935000 |
| H | -7.38783900 | 1.11581500  | -1.73990000 |
| H | -7.06806200 | -0.57170000 | -1.28328400 |
| C | -4.78876700 | 2.02932000  | -1.10545100 |
| H | -5.37767400 | 2.82202300  | -1.57399800 |
| H | -4.88132200 | 2.12677100  | -0.02115100 |
| H | -3.74052200 | 2.17157700  | -1.37654500 |
| C | -4.85888400 | 1.49763500  | -3.96907200 |
| H | -4.60320600 | 1.15905900  | -4.97643000 |
| H | -5.82368200 | 2.01160800  | -4.01840800 |
| H | -4.09742700 | 2.21066100  | -3.64840800 |
| C | -5.83927700 | -0.78925700 | -3.62121900 |
| H | -6.85253900 | -0.41763400 | -3.79489100 |
| H | -5.42207500 | -1.11687300 | -4.57651000 |
| H | -5.89801400 | -1.65828500 | -2.95938900 |

**PC**

Charge: 0, Spin: 1

|   |             |            |             |
|---|-------------|------------|-------------|
| C | -0.18306400 | 1.56025000 | -0.28732900 |
| O | 0.18308700  | 1.47540200 | -1.45968300 |
| N | 0.68518700  | 1.71896300 | 0.75678200  |
| H | 0.29575800  | 1.95247200 | 1.65620900  |
| C | -1.63988400 | 1.48440800 | 0.07997400  |
| C | -2.57278400 | 1.84345000 | -0.90082700 |
| C | -2.09341600 | 1.01258300 | 1.31829700  |
| C | -3.93814500 | 1.75639700 | -0.63943300 |

|   |             |             |             |
|---|-------------|-------------|-------------|
| H | -2.20215900 | 2.17621400  | -1.86457100 |
| C | -3.46079500 | 0.91697000  | 1.57780300  |
| H | -1.38441700 | 0.66359300  | 2.06335400  |
| C | -4.38550400 | 1.29370200  | 0.60217700  |
| H | -4.65504800 | 2.04408100  | -1.40307700 |
| H | -3.80317400 | 0.53407500  | 2.53480300  |
| H | -5.45018400 | 1.21909800  | 0.80439200  |
| C | 2.14998300  | 1.77392200  | 0.61387100  |
| H | 2.53196600  | 1.87497300  | 1.63920200  |
| C | 2.69080900  | 0.45751700  | 0.02451700  |
| C | 2.30971500  | -0.76267200 | 0.86658300  |
| H | 3.78104600  | 0.52778800  | -0.05037300 |
| H | 2.29726200  | 0.34173500  | -0.98774100 |
| H | 2.73476400  | -0.69439700 | 1.87438500  |
| H | 1.22280600  | -0.82164400 | 0.95922500  |
| C | 2.58323800  | 3.02024100  | -0.18479000 |
| C | 4.09450800  | 3.27165000  | -0.17175300 |
| H | 2.06613700  | 3.88585500  | 0.24786100  |
| H | 2.21564100  | 2.91390600  | -1.20931300 |
| H | 4.33044200  | 4.22240300  | -0.65985900 |
| H | 4.48359400  | 3.31972500  | 0.85277900  |
| H | 4.64604500  | 2.48854900  | -0.70068800 |
| S | 2.88034600  | -2.31975800 | 0.06471300  |
| C | 1.39989800  | -3.40595100 | 0.27769700  |
| H | 1.63635100  | -4.27616100 | -0.34523400 |
| H | 1.35031300  | -3.75590400 | 1.31334600  |
| C | 0.07528300  | -2.79507300 | -0.12792300 |
| C | -1.03486900 | -2.92462200 | 0.71713800  |
| C | -0.07572900 | -2.09269200 | -1.33229700 |
| C | -2.27249400 | -2.38481300 | 0.35959200  |
| H | -0.92848300 | -3.45311500 | 1.66185700  |
| C | -1.30644100 | -1.54120700 | -1.68342200 |
| H | 0.78687400  | -1.94952900 | -1.97562900 |
| C | -2.41151100 | -1.69186900 | -0.84244200 |
| H | -3.12110000 | -2.48634600 | 1.03010000  |
| H | -1.39256400 | -0.96522300 | -2.59900400 |
| H | -3.36119900 | -1.23510600 | -1.10203500 |

**PC'**

Charge: 0, Spin: 1

|   |            |             |             |
|---|------------|-------------|-------------|
| C | 1.39953900 | 0.80630700  | 0.78050700  |
| O | 0.98003400 | 0.72056900  | 1.93252700  |
| C | 2.65793000 | -2.86915600 | 0.29120200  |
| H | 2.52373800 | -3.02439500 | 1.37067300  |
| N | 1.27013200 | -0.21619400 | -0.13017200 |
| C | 2.08235800 | 2.04607000  | 0.27893000  |
| C | 2.97125300 | 2.05188800  | -0.80568800 |
| C | 1.82025200 | 3.24269000  | 0.95948600  |
| C | 3.57204100 | 3.24245900  | -1.21522600 |
| H | 3.22666000 | 1.12510400  | -1.31184700 |
| C | 2.41406600 | 4.43222000  | 0.54420900  |
| H | 1.14929700 | 3.21219100  | 1.81131600  |
| C | 3.28913600 | 4.43490000  | -0.54572800 |
| H | 4.26678700 | 3.23737400  | -2.04996800 |



|   |             |             |             |
|---|-------------|-------------|-------------|
| H | 2.19838000  | 5.35717000  | 1.07096700  |
| H | 3.75558600  | 5.36170600  | -0.86714800 |
| C | 1.28233200  | -2.67207000 | -0.36080400 |
| C | 0.55138300  | -1.43540500 | 0.17693600  |
| H | 0.64780700  | -3.54684600 | -0.18526200 |
| H | 1.39441200  | -2.58146400 | -1.45059200 |
| H | 0.47533800  | -1.47619400 | 1.26538500  |
| H | 1.40230100  | -0.00729600 | -1.11014500 |
| C | 3.46117400  | -4.03912200 | -0.29766700 |
| H | 4.46156700  | -4.03595700 | 0.15300600  |
| S | -1.17366600 | -1.41689200 | -0.50974800 |
| C | -1.80602600 | 0.12682700  | 0.29629600  |
| H | -1.54166500 | 0.08551700  | 1.35586300  |
| H | -1.28836200 | 0.98307800  | -0.14417300 |
| C | -3.29331200 | 0.23278500  | 0.08713400  |
| C | -3.81255800 | 0.95799700  | -0.99259400 |
| C | -4.18241800 | -0.41255400 | 0.95741200  |
| C | -5.19079000 | 1.04520200  | -1.19494000 |
| H | -3.13064600 | 1.45793200  | -1.67600300 |
| C | -5.55981400 | -0.32608100 | 0.75874300  |
| H | -3.78686400 | -0.98466600 | 1.79258400  |
| C | -6.06821600 | 0.40374300  | -0.31885700 |
| H | -5.57848000 | 1.61481600  | -2.03486300 |
| H | -6.23690300 | -0.82695000 | 1.44494400  |
| H | -7.14122600 | 0.47258700  | -0.47332500 |
| H | 3.61107500  | -3.86902000 | -1.37297300 |
| C | 2.81857500  | -5.41459300 | -0.08184700 |
| H | 2.64038500  | -5.60049200 | 0.98377800  |
| H | 1.85712500  | -5.50132000 | -0.59827900 |
| H | 3.46445300  | -6.21522400 | -0.45665200 |
| H | 3.23527900  | -1.94321000 | 0.18463400  |

#### [Ni]OBpin

Charge: 1, Spin: 1

|    |             |             |             |
|----|-------------|-------------|-------------|
| C  | -2.78274400 | -1.10371800 | 0.44191600  |
| C  | -3.73627000 | -1.92006300 | 1.07078100  |
| C  | -3.26812000 | -3.17280200 | 1.53677100  |
| H  | -3.95124200 | -3.85850900 | 2.02931800  |
| C  | -1.94215300 | -3.50924600 | 1.36336900  |
| H  | -1.56612900 | -4.46255900 | 1.71709600  |
| C  | -1.02462900 | -2.62900400 | 0.72929800  |
| C  | -3.14904700 | 0.17019900  | -0.06101300 |
| C  | -4.46213800 | 0.65291600  | 0.06580900  |
| C  | -4.69766300 | 1.94543700  | -0.46295700 |
| C  | -2.36289900 | 2.08835600  | -1.15240300 |
| C  | -3.66268100 | 2.64424800  | -1.05505200 |
| H  | -5.68940100 | 2.38342200  | -0.39916500 |
| H  | -3.82855100 | 3.63636900  | -1.45922300 |
| N  | -2.14269400 | 0.86481000  | -0.65568500 |
| N  | -1.47054300 | -1.44770100 | 0.27630400  |
| Ni | -0.50816700 | -0.09730400 | -0.65147600 |
| C  | 0.41276900  | -3.00153600 | 0.52922600  |
| C  | 0.71634100  | -3.43192900 | -0.92572000 |
| H  | 0.66318200  | -3.81848800 | 1.21296000  |

|   |             |             |             |
|---|-------------|-------------|-------------|
| H | 1.05139400  | -2.15131000 | 0.78805900  |
| C | 2.21134900  | -3.70153600 | -1.12962100 |
| H | 0.12897200  | -4.32444900 | -1.17737500 |
| H | 0.40115000  | -2.63372800 | -1.60768600 |
| C | 2.54649900  | -4.06327100 | -2.57873100 |
| H | 2.76946400  | -2.80860300 | -0.82603700 |
| H | 2.52959000  | -4.51045500 | -0.45840600 |
| H | 3.61692900  | -4.25417200 | -2.70019300 |
| H | 2.00930200  | -4.96253200 | -2.89982400 |
| H | 2.27292600  | -3.24870400 | -3.25871500 |
| C | -1.19672200 | 2.82220300  | -1.75874900 |
| C | -0.18306400 | 3.32155000  | -0.69947500 |
| H | -1.57178100 | 3.66984200  | -2.33960700 |
| H | -0.68306400 | 2.15175500  | -2.45898600 |
| C | -0.76560300 | 4.33292500  | 0.29229700  |
| H | 0.22828600  | 2.46207700  | -0.15271800 |
| H | 0.66615900  | 3.76153200  | -1.23341700 |
| C | 0.27386800  | 4.81326700  | 1.30936400  |
| H | -1.16878800 | 5.19089600  | -0.26218800 |
| H | -1.61685900 | 3.88378500  | 0.82269900  |
| H | -0.15607900 | 5.53938000  | 2.00510200  |
| H | 0.66571600  | 3.97575100  | 1.89702600  |
| H | 1.12240900  | 5.29141500  | 0.80836700  |
| C | -5.08023500 | -1.42494100 | 1.18900100  |
| C | -5.42937300 | -0.19081400 | 0.71002800  |
| H | -5.82140300 | -2.05306900 | 1.67298600  |
| H | -6.44858900 | 0.16813800  | 0.81131700  |
| O | 2.69554900  | -0.56171200 | 0.69190500  |
| O | 3.10299000  | 1.17575200  | -0.77133400 |
| C | 4.03195900  | 1.35186100  | 0.34171700  |
| C | 4.04412000  | -0.08037100 | 0.99670100  |
| B | 2.28615300  | 0.12905900  | -0.43053400 |
| O | 1.15850600  | -0.19227300 | -1.12799200 |
| C | 5.37280800  | 1.81829600  | -0.21142200 |
| H | 5.26522000  | 2.81502000  | -0.64737600 |
| H | 6.11859700  | 1.87407800  | 0.58764400  |
| H | 5.74003400  | 1.14800900  | -0.98965400 |
| C | 3.42099800  | 2.42218600  | 1.25255500  |
| H | 4.08374800  | 2.67152800  | 2.08529600  |
| H | 3.24521900  | 3.32733400  | 0.66601800  |
| H | 2.46153600  | 2.08887000  | 1.66032500  |
| C | 4.23562000  | -0.09985700 | 2.50808400  |
| H | 4.21910500  | -1.13181300 | 2.86898900  |
| H | 5.20216000  | 0.33768800  | 2.77634300  |
| H | 3.44707000  | 0.45269600  | 3.02151400  |
| C | 5.01962300  | -1.04456300 | 0.31528600  |
| H | 6.05828300  | -0.79177100 | 0.54366000  |
| H | 4.82434300  | -2.05880300 | 0.67316700  |
| H | 4.88963000  | -1.03407900 | -0.77063200 |

**HBpin**

Charge: 0, Spin: 1

|   |             |            |             |
|---|-------------|------------|-------------|
| O | -1.07867300 | 1.19635500 | -0.38911700 |
| O | 1.07856200  | 1.19656800 | 0.38892300  |

|   |             |             |             |
|---|-------------|-------------|-------------|
| C | -0.78643400 | -0.19121300 | -0.04845600 |
| C | 0.78649200  | -0.19113800 | 0.04849200  |
| C | 1.47631200  | -0.46368300 | -1.29305400 |
| H | 2.54294300  | -0.24699300 | -1.19257800 |
| H | 1.35923100  | -1.50691400 | -1.60023900 |
| H | 1.07268400  | 0.18033100  | -2.07905200 |
| C | 1.36824600  | -1.08986100 | 1.13540900  |
| H | 1.10526900  | -2.13669700 | 0.95149400  |
| H | 2.45846900  | -1.00630300 | 1.13544400  |
| H | 1.00878100  | -0.80650800 | 2.12581300  |
| C | -1.36805700 | -1.09012700 | -1.13529700 |
| H | -1.10496500 | -2.13690000 | -0.95124500 |
| H | -2.45828600 | -1.00666200 | -1.13532600 |
| H | -1.00863200 | -0.80686200 | -2.12574900 |
| C | -1.47635300 | -0.46363200 | 1.29312900  |
| H | -2.54292100 | -0.24659800 | 1.19266400  |
| H | -1.35959800 | -1.50688900 | 1.60029300  |
| H | -1.07254500 | 0.18026300  | 2.07914600  |
| B | -0.00010900 | 1.94210700  | -0.00007100 |
| H | -0.00023000 | 3.13073600  | -0.00009300 |

#### TS6

Charge: 1, Spin: 1

|   |             |             |             |
|---|-------------|-------------|-------------|
| C | -3.45473800 | -0.78171400 | -0.51069800 |
| C | -4.59113800 | -1.56649700 | -0.78989600 |
| C | -4.35091100 | -2.89743800 | -1.20639400 |
| H | -5.18818000 | -3.55066300 | -1.43439400 |
| C | -3.05531000 | -3.35000600 | -1.32117300 |
| H | -2.84991300 | -4.36431200 | -1.64439000 |
| C | -1.95539800 | -2.50526700 | -1.02320800 |
| C | -3.61899300 | 0.57321700  | -0.08642900 |
| C | -4.90670400 | 1.12505400  | 0.06657700  |
| C | -4.96607400 | 2.46486800  | 0.51705100  |
| C | -2.53888600 | 2.53252300  | 0.62112400  |
| C | -3.80040200 | 3.14862900  | 0.79722200  |
| H | -5.93135800 | 2.94404200  | 0.65239400  |
| H | -3.83274500 | 4.16865100  | 1.16277400  |
| N | -2.47998900 | 1.27308600  | 0.16844700  |
| N | -2.17451100 | -1.24670800 | -0.61807200 |
| C | -0.54338400 | -2.96641500 | -1.21682500 |
| C | 0.05642200  | -2.38608000 | -2.51826800 |
| H | -0.51839400 | -4.05989600 | -1.24942000 |
| H | 0.04984900  | -2.64435200 | -0.35985900 |
| C | 1.54808100  | -2.69480200 | -2.67041500 |
| H | -0.50101900 | -2.78026400 | -3.37826000 |
| H | -0.07521500 | -1.29860400 | -2.52019700 |
| C | 2.10286800  | -2.14445600 | -3.98744100 |
| H | 2.08522300  | -2.24561000 | -1.82665800 |
| H | 1.71015300  | -3.77970700 | -2.61537900 |
| H | 3.17401300  | -2.34792000 | -4.08274000 |
| H | 1.60111300  | -2.59827000 | -4.84946500 |
| H | 1.95389700  | -1.06109900 | -4.03740000 |
| C | -1.24790800 | 3.22927500  | 0.96768700  |
| C | -0.38500000 | 2.43886100  | 1.97336100  |

|   |             |             |             |
|---|-------------|-------------|-------------|
| H | -1.48148400 | 4.21782600  | 1.37299300  |
| H | -0.65938900 | 3.38302300  | 0.05545200  |
| C | -1.08783900 | 2.08441500  | 3.28613900  |
| H | -0.01878800 | 1.51337400  | 1.50170600  |
| H | 0.52776400  | 3.01243200  | 2.16139300  |
| C | -0.22051700 | 1.18295300  | 4.16930800  |
| H | -1.35091700 | 3.00700800  | 3.81941400  |
| H | -2.03580200 | 1.57213100  | 3.07211300  |
| H | -0.72790000 | 0.93017500  | 5.10483400  |
| H | 0.01297200  | 0.24949000  | 3.64539200  |
| H | 0.72558600  | 1.67332000  | 4.42422700  |
| C | -5.89467600 | -0.98499300 | -0.64012700 |
| C | -6.04837300 | 0.30820900  | -0.22740300 |
| H | -6.76250200 | -1.59859000 | -0.86078500 |
| H | -7.03873400 | 0.73740000  | -0.11337100 |
| O | 0.91358500  | -1.59297900 | 1.77523200  |
| O | 2.91232900  | -0.90828000 | 0.85110600  |
| C | 3.23940000  | -1.46446100 | 2.15899200  |
| C | 1.96474800  | -2.33609400 | 2.47138100  |
| B | 1.54134300  | -0.91011800 | 0.74467900  |
| C | 4.54122300  | -2.24721200 | 2.03802000  |
| H | 5.36238700  | -1.56154000 | 1.81274400  |
| H | 4.77203400  | -2.75800500 | 2.97797600  |
| H | 4.49132400  | -2.98726600 | 1.23792900  |
| C | 3.40711300  | -0.28038200 | 3.11593600  |
| H | 3.71258200  | -0.61090400 | 4.11230200  |
| H | 4.17728600  | 0.38804600  | 2.72290900  |
| H | 2.47741900  | 0.28731900  | 3.20601200  |
| C | 1.60315100  | -2.44632000 | 3.94658200  |
| H | 0.69436700  | -3.04367500 | 4.06096500  |
| H | 2.40720600  | -2.94188200 | 4.49932800  |
| H | 1.42647600  | -1.46793400 | 4.39411100  |
| C | 2.01972300  | -3.72372100 | 1.82389600  |
| H | 2.74667300  | -4.37053900 | 2.32168800  |
| H | 1.03385900  | -4.19057400 | 1.89965300  |
| H | 2.28682500  | -3.65277000 | 0.76532900  |
| O | 0.86815300  | -0.34480800 | -0.28493300 |
| B | 1.02110100  | 1.41977500  | -1.31376400 |
| O | 1.65731000  | 2.26475100  | -0.44440300 |
| C | 2.92340700  | 2.65260400  | -1.07474100 |
| O | 1.67129800  | 1.16210300  | -2.48129100 |
| C | 3.04537400  | 1.65573400  | -2.31369600 |
| H | -0.23077200 | 1.43105700  | -1.34358000 |
| C | 4.02109700  | 2.49692200  | -0.02620700 |
| H | 3.83591500  | 3.19189100  | 0.79799000  |
| H | 4.03541900  | 1.48292900  | 0.37563100  |
| H | 5.00186200  | 2.72948100  | -0.45182600 |
| C | 3.93935100  | 0.44309700  | -2.04662300 |
| H | 4.98296700  | 0.74978800  | -1.93206900 |
| H | 3.63518600  | -0.09955600 | -1.15238900 |
| H | 3.87890400  | -0.23532200 | -2.89978000 |
| C | 3.44881600  | 2.31996700  | -3.62725500 |
| H | 4.45125200  | 2.75163500  | -3.54916200 |
| H | 3.46437300  | 1.56872900  | -4.42115400 |

|    |             |            |             |
|----|-------------|------------|-------------|
| H  | 2.74958600  | 3.10450200 | -3.91981000 |
| C  | 2.75829500  | 4.12021300 | -1.47391400 |
| H  | 3.66718200  | 4.51659300 | -1.93401100 |
| H  | 1.92835800  | 4.24724100 | -2.17392100 |
| H  | 2.54053500  | 4.70926900 | -0.57884300 |
| Ni | -0.87594500 | 0.22494900 | -0.18988100 |

**IM6**

Charge: 1, Spin: 1

|    |             |             |             |
|----|-------------|-------------|-------------|
| C  | -2.27436100 | -2.68552900 | -0.50473800 |
| C  | -2.80988900 | -3.74523800 | -1.26076200 |
| C  | -3.78752200 | -3.39407400 | -2.22077000 |
| H  | -4.22420000 | -4.15816100 | -2.85731800 |
| C  | -4.23161200 | -2.09117700 | -2.27773400 |
| H  | -5.04332400 | -1.81603600 | -2.94196100 |
| C  | -3.66014500 | -1.07931000 | -1.46265400 |
| C  | -1.42484600 | -2.97528400 | 0.60420000  |
| C  | -1.12998200 | -4.30117200 | 0.96367200  |
| C  | -0.43291200 | -4.47266700 | 2.18415000  |
| C  | -0.46466500 | -2.06109300 | 2.53293600  |
| C  | -0.14980100 | -3.37411400 | 2.96920600  |
| H  | -0.16552500 | -5.47158400 | 2.51648900  |
| H  | 0.32312200  | -3.49432800 | 3.93734600  |
| N  | -1.03694400 | -1.89667500 | 1.33631300  |
| N  | -2.62344700 | -1.36825000 | -0.66501600 |
| C  | -1.64428600 | 2.42353400  | -0.92115200 |
| O  | -2.32117300 | 2.73445100  | -1.88513800 |
| C  | -0.18361100 | 1.11208400  | -2.45581100 |
| H  | -0.35106500 | 2.05905900  | -2.97897900 |
| Ni | -1.02835400 | -0.37355400 | 0.14068600  |
| N  | -0.68973600 | 1.33959200  | -1.03711300 |
| C  | -4.26894100 | 0.29407200  | -1.41793500 |
| C  | -4.50850900 | 0.78602800  | 0.02205800  |
| H  | -5.22095500 | 0.26231900  | -1.95760700 |
| H  | -3.64333700 | 1.01554600  | -1.94931400 |
| C  | -5.24725500 | 2.12558600  | 0.07007200  |
| H  | -5.07719900 | 0.02713100  | 0.57580900  |
| H  | -3.54696000 | 0.88097300  | 0.54226500  |
| C  | -5.44170900 | 2.62656400  | 1.50370600  |
| H  | -4.68382800 | 2.86194200  | -0.51445100 |
| H  | -6.22237300 | 2.01973300  | -0.42325900 |
| H  | -5.96127900 | 3.58929700  | 1.52027000  |
| H  | -6.03459900 | 1.91770400  | 2.09246400  |
| H  | -4.47825400 | 2.76072300  | 2.00655100  |
| C  | -0.23313600 | -0.86182000 | 3.41082600  |
| C  | 1.22286400  | -0.63995800 | 3.86064700  |
| H  | -0.87080700 | -0.98539700 | 4.29773800  |
| H  | -0.59139400 | 0.02048800  | 2.88063200  |
| C  | 1.41566900  | 0.74607600  | 4.48580100  |
| H  | 1.51701100  | -1.41591000 | 4.57949000  |
| H  | 1.89031100  | -0.72700100 | 3.00243900  |
| C  | 2.84789800  | 0.96814100  | 4.97964100  |
| H  | 1.16722900  | 1.50111300  | 3.72719800  |
| H  | 0.70812100  | 0.88695300  | 5.31443000  |

|   |             |             |             |
|---|-------------|-------------|-------------|
| H | 2.98190300  | 1.97804700  | 5.37840500  |
| H | 3.10611800  | 0.25839700  | 5.77310700  |
| H | 3.56850300  | 0.83026200  | 4.16574600  |
| C | -1.74440300 | 3.12650600  | 0.38707200  |
| C | -1.13773400 | 2.67306100  | 1.57045100  |
| C | -2.50081600 | 4.31151200  | 0.40983200  |
| C | -1.31937500 | 3.37582300  | 2.76042600  |
| H | -0.49866300 | 1.79858300  | 1.57276100  |
| C | -2.65925700 | 5.02134900  | 1.59586300  |
| H | -2.95259000 | 4.65965900  | -0.51207300 |
| C | -2.07805100 | 4.54854600  | 2.77659300  |
| H | -0.85355400 | 3.01268900  | 3.67141000  |
| H | -3.23975100 | 5.93820100  | 1.60302600  |
| H | -2.21008900 | 5.09710900  | 3.70418600  |
| C | -2.39865900 | -5.08830100 | -0.96024800 |
| C | -1.59492500 | -5.35802500 | 0.11259600  |
| H | -2.77832800 | -5.89555100 | -1.57887400 |
| H | -1.32672800 | -6.38121800 | 0.35640900  |
| C | 1.32785900  | 0.81044900  | -2.40886300 |
| C | 2.11485600  | 1.47996300  | -3.54543200 |
| H | 1.48543800  | -0.26993600 | -2.42974700 |
| H | 1.74942600  | 1.16060400  | -1.46575600 |
| H | 1.84994100  | 1.06865700  | -4.52126700 |
| C | -0.99971800 | 0.02794300  | -3.16479500 |
| H | -2.05347100 | 0.30708100  | -3.11540100 |
| H | -0.88042300 | -0.91274200 | -2.61341100 |
| C | -0.60768900 | -0.18969400 | -4.62868300 |
| H | 0.40052500  | -0.60268600 | -4.72322700 |
| H | -1.29507800 | -0.89649500 | -5.10251500 |
| H | -0.64907900 | 0.74513900  | -5.19740100 |
| H | 1.89829000  | 2.55276600  | -3.58127300 |
| S | 3.93494400  | 1.27512600  | -3.38026500 |
| C | 4.35809300  | 2.81940300  | -2.44458600 |
| H | 4.22917000  | 3.67059100  | -3.11900700 |
| H | 5.42762900  | 2.71495400  | -2.23977600 |
| C | 3.57295400  | 3.01399400  | -1.17430800 |
| C | 2.54389500  | 3.96376100  | -1.11210400 |
| C | 3.82172600  | 2.21272000  | -0.05123300 |
| C | 1.78993100  | 4.12182800  | 0.05466900  |
| H | 2.34031000  | 4.59151500  | -1.97622200 |
| C | 3.07606300  | 2.37071900  | 1.11390500  |
| H | 4.58363500  | 1.44163600  | -0.10125900 |
| C | 2.06508600  | 3.33300400  | 1.17347900  |
| H | 0.99934000  | 4.86574700  | 0.09418700  |
| H | 3.26932500  | 1.72482700  | 1.96235800  |
| H | 1.49146600  | 3.46577000  | 2.08413500  |
| O | 1.43092200  | -2.02342600 | -0.29808900 |
| O | 2.94961700  | -0.73119900 | 0.85231100  |
| C | 3.62368200  | -1.99440800 | 0.60976500  |
| C | 2.71568400  | -2.67840500 | -0.49409500 |
| B | 1.64129900  | -0.85322600 | 0.42477300  |
| O | 0.67081300  | 0.03781400  | 0.72458200  |
| H | 0.12397300  | 1.55774000  | -0.45272200 |
| C | 5.05282800  | -1.69357200 | 0.16713800  |

|   |            |             |             |
|---|------------|-------------|-------------|
| H | 5.59258600 | -1.20809200 | 0.98508400  |
| H | 5.58352500 | -2.61560800 | -0.08957100 |
| H | 5.07122900 | -1.02620900 | -0.69598000 |
| C | 3.63420500 | -2.75665700 | 1.94013300  |
| H | 4.18217400 | -3.69932500 | 1.85951200  |
| H | 4.11928200 | -2.13801100 | 2.69951100  |
| H | 2.61790800 | -2.97236700 | 2.27989600  |
| C | 2.50794600 | -4.18041800 | -0.31466700 |
| H | 1.85084200 | -4.55404000 | -1.10548600 |
| H | 3.45954600 | -4.71617600 | -0.38136400 |
| H | 2.04342400 | -4.40843500 | 0.64596800  |
| C | 3.17662100 | -2.38318800 | -1.92330000 |
| H | 4.09109400 | -2.93170700 | -2.16544500 |
| H | 2.39440000 | -2.69778300 | -2.62078800 |
| H | 3.36950800 | -1.31971000 | -2.07463200 |

### IM7

Charge: 1, Spin: 1

|    |             |             |             |
|----|-------------|-------------|-------------|
| C  | 3.32721500  | 0.38460000  | -0.26227800 |
| C  | 4.72074500  | 0.31583100  | -0.06075800 |
| C  | 5.32030300  | 1.41091800  | 0.60201300  |
| H  | 6.39125100  | 1.41219800  | 0.78291600  |
| C  | 4.54098800  | 2.48069500  | 0.98600300  |
| H  | 4.98845000  | 3.34470300  | 1.46407400  |
| C  | 3.13963400  | 2.47558500  | 0.78135900  |
| C  | 2.66816300  | -0.62980900 | -1.03158300 |
| C  | 3.40619400  | -1.70929500 | -1.55753800 |
| C  | 2.69623900  | -2.60586600 | -2.39059000 |
| C  | 0.70281700  | -1.23427200 | -2.13775000 |
| C  | 1.37615200  | -2.35197900 | -2.69718900 |
| H  | 3.20957700  | -3.46006300 | -2.82291900 |
| H  | 0.84356500  | -2.98510300 | -3.39626400 |
| N  | 1.34392800  | -0.43274000 | -1.28113900 |
| N  | 2.55462900  | 1.42017800  | 0.19429300  |
| Ni | 0.72493400  | 0.90782500  | 0.12857500  |
| C  | 2.28943200  | 3.64713900  | 1.18575100  |
| C  | 1.58426100  | 4.31622000  | -0.01207700 |
| H  | 2.90774200  | 4.37886900  | 1.71457500  |
| H  | 1.52686600  | 3.28708600  | 1.88582100  |
| C  | 0.57482800  | 5.38182900  | 0.42456000  |
| H  | 2.33707100  | 4.75730300  | -0.67857500 |
| H  | 1.06074400  | 3.54572300  | -0.59174100 |
| C  | -0.11838900 | 6.05068500  | -0.76603900 |
| H  | -0.17591200 | 4.91037100  | 1.07317000  |
| H  | 1.07844800  | 6.14199800  | 1.03595900  |
| H  | -0.85918600 | 6.78498700  | -0.43532300 |
| H  | 0.60394700  | 6.57037000  | -1.40485300 |
| H  | -0.63338500 | 5.30921900  | -1.38853400 |
| C  | -0.68741100 | -0.84283100 | -2.57950900 |
| C  | -1.86808600 | -1.76277400 | -2.19693600 |
| H  | -0.65764700 | -0.76946400 | -3.67528900 |
| H  | -0.88612900 | 0.16360700  | -2.20499900 |
| C  | -1.88894400 | -3.15583300 | -2.83778200 |

|   |             |             |             |
|---|-------------|-------------|-------------|
| H | -1.93268400 | -1.87186900 | -1.11041400 |
| H | -2.77727900 | -1.22903100 | -2.50131000 |
| C | -3.21639800 | -3.87784400 | -2.58402100 |
| H | -1.71885500 | -3.06743300 | -3.91950100 |
| H | -1.06691300 | -3.76383600 | -2.44111800 |
| H | -3.20905300 | -4.88865000 | -3.00185900 |
| H | -3.42196600 | -3.95812400 | -1.51084300 |
| H | -4.05166800 | -3.33342400 | -3.03769500 |
| C | 5.44079000  | -0.82286200 | -0.55698000 |
| C | 4.80857600  | -1.80128600 | -1.26952900 |
| H | 6.50857800  | -0.88030800 | -0.36941200 |
| H | 5.36553800  | -2.64886300 | -1.65692000 |
| O | -1.74456000 | -2.14746300 | 1.43601900  |
| O | 0.49359200  | -1.59946800 | 1.48207500  |
| C | 0.36266800  | -2.79400900 | 2.32573700  |
| C | -1.03508800 | -3.36421200 | 1.86536000  |
| B | -0.77784900 | -1.24408200 | 1.14519600  |
| O | -0.99048800 | -0.04179400 | 0.46855900  |
| C | 1.55548400  | -3.69953900 | 2.04913100  |
| H | 2.47165600  | -3.21373300 | 2.39550400  |
| H | 1.45020200  | -4.64785000 | 2.58438800  |
| H | 1.66285500  | -3.90675000 | 0.98301700  |
| C | 0.37024500  | -2.30352400 | 3.77473700  |
| H | 0.33491100  | -3.13980200 | 4.47760000  |
| H | 1.28803400  | -1.73774800 | 3.95342000  |
| H | -0.48029200 | -1.64549800 | 3.97380800  |
| C | -1.85359900 | -4.03223300 | 2.96073500  |
| H | -2.80501600 | -4.37828900 | 2.54909500  |
| H | -1.31874800 | -4.89890600 | 3.36096600  |
| H | -2.06847500 | -3.34270600 | 3.77785400  |
| C | -0.93329400 | -4.26369700 | 0.63174700  |
| H | -0.46872100 | -5.22183400 | 0.87795800  |
| H | -1.93638700 | -4.45515300 | 0.24478500  |
| H | -0.34671400 | -3.78531200 | -0.15756500 |
| O | -2.28363300 | 1.58000800  | -0.69817800 |
| O | -3.28347400 | 0.48685100  | 1.07013100  |
| C | -3.52846200 | 2.31491400  | -0.42556700 |
| C | -4.35073600 | 1.26254800  | 0.41860000  |
| B | -2.18918500 | 0.65481500  | 0.29444500  |
| C | -5.13447800 | 0.27262600  | -0.44560400 |
| H | -5.50225200 | -0.53804900 | 0.18777800  |
| H | -5.98885000 | 0.75545500  | -0.92682600 |
| H | -4.49905300 | -0.16385400 | -1.22108700 |
| C | -5.23740800 | 1.85993400  | 1.50212300  |
| H | -5.99563600 | 2.51108600  | 1.05650800  |
| H | -5.74986700 | 1.05893100  | 2.04085400  |
| H | -4.65729500 | 2.43738000  | 2.22294000  |
| C | -4.15592400 | 2.70674700  | -1.75555900 |
| H | -5.12765600 | 3.18222300  | -1.59223300 |
| H | -3.50964800 | 3.42174800  | -2.27155100 |
| H | -4.29414100 | 1.84133400  | -2.40527200 |
| C | -3.12626400 | 3.55465300  | 0.37709200  |
| H | -2.39948600 | 4.13157500  | -0.19961200 |
| H | -3.98975700 | 4.19218600  | 0.58331300  |



|   |             |            |            |
|---|-------------|------------|------------|
| H | -2.66273900 | 3.27716800 | 1.32816600 |
| H | 0.37608300  | 1.80789000 | 1.20207300 |

**O(Bpin)2**

Charge: 0, Spin: 1

|   |             |             |             |
|---|-------------|-------------|-------------|
| O | -2.34894400 | -1.48003200 | 0.03018900  |
| O | -1.45195400 | 0.62050700  | -0.26933300 |
| C | -2.89349500 | 0.78735100  | -0.33534100 |
| C | -3.41288200 | -0.54040900 | 0.33858000  |
| B | -1.21718700 | -0.73209400 | -0.18088700 |
| O | 0.00814500  | -1.31060900 | -0.32611700 |
| C | -3.26956900 | 2.07259200  | 0.39477700  |
| H | -2.85871000 | 2.93312000  | -0.14060700 |
| H | -4.35764700 | 2.18590700  | 0.44107100  |
| H | -2.87010200 | 2.08564400  | 1.40992200  |
| C | -3.25831600 | 0.88909800  | -1.82106100 |
| H | -4.32479100 | 1.08674500  | -1.96305400 |
| H | -2.68937900 | 1.70871200  | -2.26777800 |
| H | -2.99955900 | -0.03229700 | -2.35025900 |
| C | -4.72185700 | -1.08171900 | -0.22634800 |
| H | -4.99140200 | -2.00560000 | 0.29281900  |
| H | -5.53217500 | -0.35942200 | -0.08295200 |
| H | -4.63517300 | -1.30659400 | -1.29040700 |
| C | -3.48804600 | -0.44505800 | 1.86706100  |
| H | -4.31222300 | 0.19698100  | 2.19098900  |
| H | -3.64433900 | -1.44686500 | 2.27541600  |
| H | -2.55465600 | -0.05153400 | 2.27945700  |
| O | 2.33615400  | -1.15876600 | -0.85920000 |
| O | 1.48479900  | 0.30844700  | 0.69836000  |
| C | 3.48155000  | -0.49305100 | -0.26185400 |
| C | 2.82236000  | 0.78182200  | 0.39005300  |
| C | 2.66089200  | 1.94547600  | -0.59551700 |
| H | 2.00423000  | 2.69575600  | -0.14793900 |
| H | 3.62154700  | 2.41301600  | -0.83034700 |
| H | 2.19909400  | 1.60720300  | -1.52735100 |
| C | 3.47967500  | 1.26321500  | 1.67930300  |
| H | 4.52113200  | 1.54848100  | 1.49840200  |
| H | 2.94616100  | 2.13923800  | 2.05853200  |
| H | 3.45501300  | 0.49314000  | 2.45186600  |
| C | 4.50299900  | -0.20142000 | -1.35610000 |
| H | 5.33953700  | 0.38065000  | -0.95577200 |
| H | 4.89801200  | -1.14125000 | -1.75176400 |
| H | 4.05451800  | 0.35055700  | -2.18338000 |
| C | 4.06616600  | -1.46007000 | 0.77412200  |
| H | 4.30469500  | -2.40530700 | 0.27980200  |
| H | 4.97870600  | -1.06208200 | 1.22752100  |
| H | 3.34187800  | -1.66473000 | 1.56755800  |
| B | 1.22981800  | -0.72646500 | -0.17091000 |

**<sup>1</sup>A**

|   |             |             |            |
|---|-------------|-------------|------------|
| C | -1.12846900 | -2.10873100 | 0.38062300 |
| C | -1.50105000 | -3.43964800 | 0.67062500 |
| C | -0.48559700 | -4.29247300 | 1.15377300 |
| H | -0.71849200 | -5.32443700 | 1.40047800 |

|    |             |             |             |
|----|-------------|-------------|-------------|
| C  | 0.79274500  | -3.80645000 | 1.28292000  |
| H  | 1.59595200  | -4.44994900 | 1.62294800  |
| C  | 1.10674800  | -2.45678800 | 0.97601000  |
| C  | -2.10109200 | -1.20666700 | -0.15372100 |
| C  | -3.43329400 | -1.63550300 | -0.33245400 |
| C  | -4.35075100 | -0.67219100 | -0.80420700 |
| C  | -2.57018000 | 0.99267300  | -0.81538800 |
| C  | -3.92416300 | 0.61664800  | -1.01476700 |
| H  | -5.38750100 | -0.95027300 | -0.97087300 |
| H  | -4.62127900 | 1.38106300  | -1.33700700 |
| N  | -1.67744300 | 0.05939300  | -0.44455300 |
| N  | 0.13379900  | -1.62066100 | 0.57387700  |
| C  | 2.54083100  | -2.01221000 | 1.03426200  |
| C  | 3.10507700  | -1.70642700 | -0.37215200 |
| H  | 3.13040100  | -2.80525500 | 1.50482900  |
| H  | 2.63447400  | -1.12888100 | 1.66318600  |
| C  | 4.45584500  | -0.98771100 | -0.31943500 |
| H  | 3.19102100  | -2.64233600 | -0.94114300 |
| H  | 2.39639900  | -1.08439800 | -0.92585800 |
| C  | 4.95609400  | -0.61581200 | -1.71903600 |
| H  | 4.33940000  | -0.08070800 | 0.28483400  |
| H  | 5.19442300  | -1.61950500 | 0.19321900  |
| H  | 5.91648900  | -0.09260600 | -1.67108800 |
| H  | 5.09150400  | -1.50780000 | -2.34226900 |
| H  | 4.23898700  | 0.03923400  | -2.22588900 |
| C  | -2.19430600 | 2.44480700  | -0.96275200 |
| C  | -1.61726200 | 3.08265100  | 0.31952400  |
| H  | -3.10286000 | 2.98307900  | -1.25064400 |
| H  | -1.48026100 | 2.55380400  | -1.77896900 |
| C  | -2.47889700 | 2.88295500  | 1.57063800  |
| H  | -0.61015400 | 2.70359300  | 0.51029800  |
| H  | -1.49456100 | 4.15373000  | 0.11849900  |
| C  | -1.92714900 | 3.64740700  | 2.77732100  |
| H  | -3.51152800 | 3.19909300  | 1.36241200  |
| H  | -2.52093200 | 1.81284200  | 1.81276100  |
| H  | -2.53590900 | 3.47403200  | 3.67070900  |
| H  | -0.90377100 | 3.33023100  | 2.99425900  |
| H  | -1.91276900 | 4.72628500  | 2.58435600  |
| C  | -2.85437000 | -3.85854100 | 0.45832000  |
| C  | -3.78779800 | -2.98761600 | -0.02028600 |
| H  | -3.11985100 | -4.88536900 | 0.69056200  |
| H  | -4.81562700 | -3.30233100 | -0.17270400 |
| O  | 1.83915300  | 0.78413800  | 0.75747000  |
| Ni | 0.21831300  | 0.23910000  | -0.08538100 |
| Cl | 1.50655500  | 1.36656100  | 2.20651500  |
| O  | 2.51580000  | 0.78702300  | 3.11302100  |
| O  | 1.58465300  | 2.83437100  | 2.12618500  |
| O  | 0.12328900  | 0.90364800  | 2.52934200  |
| O  | 0.63431100  | -0.53890700 | -2.60726400 |
| Cl | 0.70140600  | 0.93707600  | -2.82139300 |
| O  | 0.55519200  | 1.60653800  | -1.37648600 |
| O  | 2.00334700  | 1.36657800  | -3.35079300 |
| O  | -0.43748700 | 1.41996700  | -3.63116200 |

<sup>1</sup>TS<sub>A-B</sub>

|   |             |             |             |
|---|-------------|-------------|-------------|
| C | -2.47893600 | -0.89301300 | -1.14254000 |
| C | -3.68162600 | -0.98626100 | -1.86365700 |
| C | -4.19824000 | 0.22582000  | -2.38242600 |
| H | -5.11101500 | 0.21450800  | -2.97122400 |
| C | -3.56502900 | 1.41009300  | -2.08908500 |
| H | -3.97303100 | 2.35766900  | -2.42255400 |
| C | -2.37052800 | 1.43685900  | -1.32027800 |
| C | -1.94497000 | -2.02887300 | -0.47364400 |
| C | -2.62369200 | -3.26114700 | -0.53393100 |
| C | -2.09406300 | -4.30890900 | 0.25222200  |
| C | -0.34639100 | -2.80499000 | 1.04306400  |
| C | -0.98892200 | -4.07073400 | 1.03600600  |
| H | -2.57569800 | -5.28254800 | 0.25152600  |
| H | -0.58276800 | -4.84947200 | 1.67089200  |
| N | -0.81962100 | -1.81923400 | 0.27330500  |
| N | -1.81781700 | 0.28131100  | -0.94318700 |
| C | -1.83104300 | 2.73841200  | -0.81052300 |
| C | -2.73148100 | 3.23930200  | 0.34897900  |
| H | -1.79810800 | 3.47038400  | -1.62401700 |
| H | -0.81710400 | 2.60551600  | -0.44347000 |
| C | -2.01149000 | 4.26421800  | 1.23121200  |
| H | -3.65674400 | 3.66727100  | -0.06053700 |
| H | -3.02583900 | 2.38637800  | 0.96617100  |
| C | -2.88139700 | 4.71912100  | 2.40628200  |
| H | -1.09939400 | 3.79518400  | 1.61790200  |
| H | -1.70272100 | 5.12681400  | 0.62373300  |
| H | -2.35913400 | 5.45925900  | 3.02155400  |
| H | -3.81794100 | 5.17303700  | 2.05975500  |
| H | -3.12630700 | 3.86360200  | 3.04327800  |
| C | 0.87815500  | -2.59034800 | 1.88791800  |
| C | 2.19516200  | -2.94069000 | 1.15728000  |
| H | 0.78362900  | -3.21385100 | 2.78335700  |
| H | 0.88330100  | -1.55645800 | 2.23701900  |
| C | 2.35454800  | -4.41544100 | 0.77301000  |
| H | 2.30160000  | -2.32409300 | 0.25918300  |
| H | 3.01990900  | -2.65280400 | 1.82036500  |
| C | 3.70802900  | -4.68711000 | 0.10809400  |
| H | 2.24501200  | -5.04451700 | 1.66761100  |
| H | 1.54878400  | -4.70998500 | 0.08826400  |
| H | 3.81458100  | -5.73934100 | -0.17413400 |
| H | 3.82406600  | -4.08158600 | -0.79774100 |
| H | 4.53448800  | -4.43569100 | 0.78270700  |
| C | -4.31750800 | -2.26586600 | -1.97614900 |
| C | -3.80941200 | -3.35983900 | -1.33418900 |
| H | -5.23091900 | -2.34228600 | -2.55818400 |
| H | -4.31212900 | -4.32009900 | -1.39744700 |
| O | 0.90569200  | 1.29745400  | -1.04463600 |
| B | 2.13179500  | 0.41771800  | 0.14687900  |
| O | 3.13686900  | -0.12705200 | -0.60990000 |
| C | 4.37548900  | 0.50072500  | -0.14717400 |
| O | 2.51720300  | 1.36568400  | 1.04864800  |
| C | 3.85552700  | 1.77937400  | 0.62790800  |

|    |             |             |             |
|----|-------------|-------------|-------------|
| H  | 1.25182300  | -0.39336600 | 0.55487900  |
| C  | 5.23896900  | 0.79800900  | -1.36737200 |
| H  | 5.54455800  | -0.14148900 | -1.83635300 |
| H  | 4.68895300  | 1.38004200  | -2.10633500 |
| H  | 6.14150500  | 1.34430300  | -1.07444300 |
| C  | 3.69029800  | 3.01408800  | -0.26396800 |
| H  | 4.66286600  | 3.41792400  | -0.56031600 |
| H  | 3.11651600  | 2.78754500  | -1.16276900 |
| H  | 3.15253300  | 3.78006800  | 0.30077800  |
| C  | 4.64865200  | 2.13310700  | 1.88113500  |
| H  | 5.68752700  | 2.36428000  | 1.62448900  |
| H  | 4.20741200  | 3.01418700  | 2.35417000  |
| H  | 4.63658700  | 1.31968400  | 2.60772700  |
| C  | 5.06060700  | -0.52122300 | 0.76481900  |
| H  | 6.03989000  | -0.16670600 | 1.09841700  |
| H  | 4.44829500  | -0.73515300 | 1.64437500  |
| H  | 5.19684300  | -1.45348300 | 0.21039300  |
| Ni | -0.14278400 | -0.02264800 | -0.09263600 |
| Cl | 0.99547200  | 0.99030400  | -2.68360900 |
| O  | -0.14299200 | 1.72621700  | -3.25759800 |
| O  | 2.29709000  | 1.53403200  | -3.09013100 |
| O  | 0.87911300  | -0.46953400 | -2.85661500 |
| O  | -2.90355500 | 0.06238400  | 1.79195500  |
| Cl | -1.75317200 | 0.46306000  | 2.66478700  |
| O  | -0.67782100 | 1.11207600  | 1.77818600  |
| O  | -2.17930000 | 1.46529200  | 3.66747000  |
| O  | -1.16281700 | -0.74517800 | 3.30906600  |

BpinClO<sub>4</sub>

|    |             |             |             |
|----|-------------|-------------|-------------|
| O  | -0.28552100 | -0.66056100 | 0.35355900  |
| O  | -1.00360800 | 1.36982800  | -0.47701700 |
| C  | -1.70699600 | -0.83174200 | 0.04563800  |
| C  | -2.20847900 | 0.66201300  | -0.03159300 |
| C  | -2.57746100 | 1.24779400  | 1.33391600  |
| H  | -2.70387700 | 2.32846800  | 1.23217800  |
| H  | -3.51057900 | 0.82137400  | 1.71237300  |
| H  | -1.78732400 | 1.06449000  | 2.06735800  |
| C  | -3.31494900 | 0.91723200  | -1.04721900 |
| H  | -4.20558400 | 0.33327400  | -0.79400000 |
| H  | -3.58601000 | 1.97621900  | -1.03838800 |
| H  | -2.99894700 | 0.65667200  | -2.05823800 |
| C  | -2.33864000 | -1.66833700 | 1.15084000  |
| H  | -3.41998400 | -1.74512000 | 0.99921700  |
| H  | -1.91762000 | -2.67692900 | 1.13410100  |
| H  | -2.15000900 | -1.23949100 | 2.13581400  |
| C  | -1.77488900 | -1.56406800 | -1.29731600 |
| H  | -1.21790800 | -2.50071500 | -1.21723200 |
| H  | -2.80791000 | -1.79199700 | -1.57401900 |
| H  | -1.32222700 | -0.96829200 | -2.09477200 |
| B  | 0.03644400  | 0.57913000  | -0.10079100 |
| O  | 1.34045100  | 1.08854600  | -0.19775500 |
| Cl | 2.63495200  | -0.02662900 | 0.01801200  |
| O  | 2.42571300  | -1.06033200 | -0.99802400 |

|                      |             |             |             |
|----------------------|-------------|-------------|-------------|
| O                    | 2.52205900  | -0.49696200 | 1.39857900  |
| O                    | 3.77341200  | 0.84969700  | -0.23337300 |
| <b><sup>1</sup>B</b> |             |             |             |
| C                    | -2.57008500 | 0.20124800  | -0.19653900 |
| C                    | -3.92755300 | 0.59285500  | -0.25150900 |
| C                    | -4.19537500 | 1.93506700  | -0.59507300 |
| H                    | -5.22321700 | 2.28236000  | -0.65138800 |
| C                    | -3.14534300 | 2.79029700  | -0.83507200 |
| H                    | -3.32530500 | 3.83205000  | -1.07555400 |
| C                    | -1.80517700 | 2.33675200  | -0.78166800 |
| C                    | -2.23313800 | -1.13305300 | 0.21843700  |
| C                    | -3.26822700 | -2.04608600 | 0.52872400  |
| C                    | -2.87601300 | -3.33653900 | 0.94833100  |
| C                    | -0.55294200 | -2.66397400 | 0.72835500  |
| C                    | -1.53752500 | -3.63468900 | 1.04622100  |
| H                    | -3.63343600 | -4.07523800 | 1.19588700  |
| H                    | -1.20911800 | -4.61570400 | 1.37208400  |
| N                    | -0.90816700 | -1.43924300 | 0.31806100  |
| N                    | -1.53558600 | 1.04851600  | -0.49487900 |
| Ni                   | 0.18520700  | 0.21167900  | -0.39309500 |
| C                    | -0.68139500 | 3.31148600  | -0.99843500 |
| C                    | 0.09422900  | 3.62395400  | 0.30142500  |
| H                    | -1.08505700 | 4.23701000  | -1.42266400 |
| H                    | 0.01471200  | 2.88426200  | -1.72636700 |
| C                    | 1.38979000  | 4.39338200  | 0.02548600  |
| H                    | -0.55419700 | 4.19142300  | 0.98332800  |
| H                    | 0.34950500  | 2.68423100  | 0.80284900  |
| C                    | 2.16108400  | 4.70949300  | 1.31000600  |
| H                    | 2.02105300  | 3.78062900  | -0.62946200 |
| H                    | 1.16128200  | 5.32058000  | -0.51937700 |
| H                    | 3.07568500  | 5.27068500  | 1.09251900  |
| H                    | 1.55671700  | 5.30887000  | 2.00188400  |
| H                    | 2.44708200  | 3.78254400  | 1.81576000  |
| C                    | 0.90246000  | -3.02183800 | 0.79869800  |
| C                    | 1.47121500  | -3.36201800 | -0.59653600 |
| H                    | 1.03101900  | -3.87881700 | 1.46910700  |
| H                    | 1.46312500  | -2.17880100 | 1.20485900  |
| C                    | 2.98547300  | -3.58713300 | -0.56083100 |
| H                    | 0.96061000  | -4.25060800 | -0.99496400 |
| H                    | 1.24797200  | -2.53028400 | -1.27390700 |
| C                    | 3.56398800  | -3.86784000 | -1.95039600 |
| H                    | 3.45981700  | -2.69480000 | -0.13832000 |
| H                    | 3.21465800  | -4.42310700 | 0.11502300  |
| H                    | 4.64607300  | -4.02711700 | -1.90510300 |
| H                    | 3.11221000  | -4.75934600 | -2.40240900 |
| H                    | 3.38059600  | -3.02230800 | -2.62291100 |
| C                    | -4.95347900 | -0.36033200 | 0.05384100  |
| C                    | -4.63614000 | -1.63295300 | 0.42437500  |
| H                    | -5.98975600 | -0.04193800 | -0.00957800 |
| H                    | -5.41440700 | -2.35274500 | 0.66041800  |
| Cl                   | 3.04095700  | 0.51616600  | 0.38634600  |
| O                    | 1.92033200  | -0.47655100 | -0.17727700 |
| O                    | 2.45752300  | 1.23055600  | 1.55164700  |

|   |            |             |             |
|---|------------|-------------|-------------|
| O | 4.13858800 | -0.39053800 | 0.77809600  |
| O | 3.43485900 | 1.45303600  | -0.68705100 |
| H | 0.79107700 | 1.28891700  | -1.09556100 |

<sup>1</sup>TS2<sub>B-D</sub>

|   |             |             |             |
|---|-------------|-------------|-------------|
| C | 3.04323500  | -0.81837100 | 0.17709200  |
| C | 4.28836100  | -1.32415100 | -0.25759600 |
| C | 4.28341700  | -2.60307200 | -0.85740300 |
| H | 5.21679600  | -3.03846300 | -1.20326000 |
| C | 3.08854500  | -3.26423700 | -1.03049200 |
| H | 3.05355000  | -4.22682000 | -1.52881100 |
| C | 1.87313000  | -2.70338000 | -0.56842400 |
| C | 2.95022000  | 0.51386800  | 0.70201500  |
| C | 4.12614200  | 1.28651100  | 0.82921500  |
| C | 3.97504500  | 2.59645100  | 1.33527100  |
| C | 1.57453000  | 2.22856700  | 1.46935000  |
| C | 2.71745800  | 3.05203800  | 1.64908700  |
| H | 4.84778900  | 3.23123600  | 1.46095000  |
| H | 2.57047600  | 4.05925300  | 2.02209100  |
| N | 1.70273500  | 0.97569600  | 1.01723900  |
| N | 1.88123500  | -1.52625300 | 0.07499100  |
| C | 0.56635200  | -3.40804700 | -0.80356100 |
| C | 0.12862000  | -4.30879900 | 0.37341100  |
| H | 0.65677800  | -4.01409000 | -1.71204500 |
| H | -0.19675800 | -2.64955800 | -0.99303200 |
| C | -1.36589300 | -4.64158700 | 0.29787900  |
| H | 0.73057300  | -5.22779900 | 0.38182900  |
| H | 0.32798900  | -3.78826400 | 1.31714700  |
| C | -1.82275700 | -5.55891300 | 1.43519800  |
| H | -1.92867200 | -3.69992700 | 0.33010800  |
| H | -1.58756400 | -5.10988700 | -0.67121300 |
| H | -2.89416900 | -5.77424600 | 1.36792500  |
| H | -1.28751200 | -6.51578000 | 1.41729400  |
| H | -1.63781600 | -5.09267900 | 2.40984200  |
| C | 0.21242000  | 2.80656900  | 1.74155800  |
| C | -0.43772100 | 3.45299300  | 0.49453800  |
| H | 0.31496300  | 3.55957400  | 2.53217200  |
| H | -0.45606400 | 2.02736700  | 2.11197600  |
| C | 0.39688000  | 4.52108500  | -0.21498200 |
| H | -0.68421500 | 2.67001300  | -0.21815600 |
| H | -1.39632900 | 3.87709500  | 0.81510800  |
| C | -0.34854300 | 5.08459100  | -1.42961100 |
| H | 0.65815200  | 5.33216500  | 0.48145600  |
| H | 1.34357800  | 4.08145200  | -0.55282700 |
| H | 0.25305500  | 5.82779800  | -1.96348800 |
| H | -0.59807600 | 4.27810100  | -2.12677400 |
| H | -1.28658200 | 5.56522600  | -1.12800300 |
| C | 5.46546300  | -0.52307400 | -0.09662800 |
| C | 5.38710800  | 0.73048000  | 0.43479800  |
| H | 6.41899700  | -0.93163100 | -0.41782400 |
| H | 6.27892100  | 1.33940600  | 0.55067700  |
| O | -1.03964300 | -0.37449000 | -1.04571400 |
| B | -1.83989100 | -0.00309600 | 0.65308900  |

|    |             |             |             |
|----|-------------|-------------|-------------|
| O  | -2.45376700 | 1.22987500  | 0.56895900  |
| C  | -3.88780300 | 1.00596600  | 0.63109300  |
| O  | -2.72778800 | -1.05282500 | 0.78073300  |
| C  | -4.01886200 | -0.54288900 | 0.34116000  |
| H  | -0.86028900 | 0.04966500  | 1.48352000  |
| C  | -4.55365000 | 1.90968500  | -0.40277600 |
| H  | -4.42169800 | 2.95589900  | -0.11159100 |
| H  | -4.09982300 | 1.77670100  | -1.38468700 |
| H  | -5.62762800 | 1.70420000  | -0.46407500 |
| C  | -4.17999100 | -0.87335700 | -1.14819000 |
| H  | -5.18183100 | -0.61051500 | -1.50146600 |
| H  | -3.44296600 | -0.35351800 | -1.75875400 |
| H  | -4.03476500 | -1.94869800 | -1.28281900 |
| C  | -5.09761800 | -1.25710100 | 1.15168200  |
| H  | -6.08662300 | -0.84321600 | 0.92936400  |
| H  | -5.10577200 | -2.31901600 | 0.88993100  |
| H  | -4.91384000 | -1.17622000 | 2.22423300  |
| C  | -4.31831900 | 1.39617300  | 2.04955100  |
| H  | -5.40222600 | 1.32487300  | 2.17969500  |
| H  | -3.83182800 | 0.75938000  | 2.79361200  |
| H  | -4.01341600 | 2.42976300  | 2.23520300  |
| Ni | 0.39775700  | -0.58638900 | 0.83193900  |
| Cl | -0.62933800 | 0.61575700  | -2.21269900 |
| O  | -0.39979800 | -0.24983400 | -3.38591100 |
| O  | -1.74264800 | 1.57251200  | -2.41820100 |
| O  | 0.61324600  | 1.31891000  | -1.79823200 |
| H  | -0.29338300 | -1.80959600 | 1.06272400  |

**<sup>1</sup>D**

|    |             |             |             |
|----|-------------|-------------|-------------|
| C  | 0.67956100  | 1.64576700  | -0.22114000 |
| C  | 1.34612300  | 2.87581500  | -0.43100300 |
| C  | 2.69022900  | 2.81021100  | -0.85712100 |
| H  | 3.24617300  | 3.72690800  | -1.03410000 |
| C  | 3.27633200  | 1.57749100  | -1.04019200 |
| H  | 4.30933000  | 1.49807600  | -1.36213300 |
| C  | 2.54462500  | 0.38658100  | -0.81418200 |
| C  | -0.68706700 | 1.64459500  | 0.22060400  |
| C  | -1.35616500 | 2.87347300  | 0.42919500  |
| C  | -2.70060300 | 2.80549300  | 0.85391300  |
| C  | -2.55044800 | 0.38210400  | 0.81189500  |
| C  | -3.28470300 | 1.57172900  | 1.03639400  |
| H  | -3.25850700 | 3.72119600  | 1.02986300  |
| H  | -4.31805800 | 1.49051500  | 1.35671900  |
| N  | -1.26887200 | 0.42484100  | 0.41675000  |
| N  | 1.26370700  | 0.42702100  | -0.41671800 |
| Ni | 0.00051100  | -1.07518500 | 0.00585800  |
| C  | 3.21055600  | -0.95164600 | -0.96028000 |
| C  | 3.61042400  | -1.53389000 | 0.41033500  |
| H  | 4.09631600  | -0.85461900 | -1.59891000 |
| H  | 2.50581900  | -1.63937300 | -1.43578200 |
| C  | 4.21279400  | -2.93660300 | 0.29427800  |
| H  | 4.32157500  | -0.85721800 | 0.90535000  |
| H  | 2.70816800  | -1.57535200 | 1.03237400  |

|   |             |             |             |
|---|-------------|-------------|-------------|
| C | 4.60394000  | -3.52094800 | 1.65490800  |
| H | 3.47922200  | -3.59252600 | -0.19179200 |
| H | 5.09207400  | -2.90810900 | -0.36474600 |
| H | 5.02449800  | -4.52693300 | 1.55390800  |
| H | 5.35201300  | -2.89438800 | 2.15497000  |
| H | 3.73143700  | -3.58700800 | 2.31440600  |
| C | -3.21401700 | -0.95735900 | 0.95748700  |
| C | -3.60096400 | -1.54643300 | -0.41388700 |
| H | -4.10505700 | -0.86038800 | 1.58870800  |
| H | -2.51112500 | -1.64127500 | 1.44125800  |
| C | -4.20104100 | -2.95001900 | -0.29688100 |
| H | -4.30939100 | -0.87362300 | -0.91797300 |
| H | -2.69334100 | -1.58841700 | -1.02806600 |
| C | -4.57826900 | -3.54167500 | -1.65827500 |
| H | -3.47051700 | -3.60199700 | 0.19901100  |
| H | -5.08644400 | -2.92059900 | 0.35386900  |
| H | -4.99786400 | -4.54796300 | -1.55631100 |
| H | -5.32280300 | -2.91901000 | -2.16839000 |
| H | -3.69951800 | -3.60927800 | -2.30927900 |
| C | 0.64367200  | 4.10580200  | -0.20733900 |
| C | -0.65595400 | 4.10467200  | 0.20520700  |
| H | 1.17086900  | 5.04068000  | -0.37528700 |
| H | -1.18494700 | 5.03863000  | 0.37264100  |
| H | -0.81935100 | -2.22300300 | 0.33468000  |
| H | 0.82711000  | -2.22376600 | -0.30272100 |

### <sup>3</sup>D

|    |             |             |             |
|----|-------------|-------------|-------------|
| C  | 0.66866800  | 1.68644300  | -0.19985100 |
| C  | 1.35928200  | 2.91389000  | -0.41779100 |
| C  | 2.69361800  | 2.85330500  | -0.82678800 |
| H  | 3.24916400  | 3.76952900  | -1.00414400 |
| C  | 3.30334400  | 1.59698300  | -1.00771000 |
| H  | 4.33830600  | 1.52699400  | -1.32562800 |
| C  | 2.58575900  | 0.42959500  | -0.77962500 |
| C  | -0.67892500 | 1.67734700  | 0.20817700  |
| C  | -1.37735100 | 2.90372700  | 0.41911800  |
| C  | -2.71076600 | 2.83423400  | 0.82634000  |
| C  | -2.57765200 | 0.41118100  | 0.78280100  |
| C  | -3.30847200 | 1.57797800  | 1.00785700  |
| H  | -3.27401500 | 3.74704700  | 0.99900600  |
| H  | -4.34404000 | 1.49902000  | 1.32150100  |
| N  | -1.28240400 | 0.44049500  | 0.39321400  |
| N  | 1.28669200  | 0.45693400  | -0.38234400 |
| Ni | 0.06945100  | -0.98741800 | 0.00559200  |
| C  | 3.20525500  | -0.93631000 | -0.92201800 |
| C  | 3.50816300  | -1.60249800 | 0.43446700  |
| H  | 4.12636100  | -0.86911300 | -1.51131600 |
| H  | 2.50964000  | -1.57623700 | -1.48649100 |
| C  | 4.03653400  | -3.03339300 | 0.29573500  |
| H  | 4.23359800  | -0.98635700 | 0.98175300  |
| H  | 2.59233200  | -1.60703600 | 1.04299000  |
| C  | 4.32850400  | -3.69165800 | 1.64752900  |
| H  | 3.30203400  | -3.63592400 | -0.25706000 |
| H  | 4.94795800  | -3.02725800 | -0.31774400 |



|   |             |             |             |
|---|-------------|-------------|-------------|
| H | 4.70333400  | -4.71305700 | 1.52518300  |
| H | 5.08031700  | -3.12398300 | 2.20746800  |
| H | 3.42395800  | -3.73863500 | 2.26510700  |
| C | -3.21468800 | -0.94744700 | 0.91860800  |
| C | -3.53183200 | -1.58918500 | -0.44574400 |
| H | -4.13495100 | -0.86891100 | 1.50790900  |
| H | -2.53416000 | -1.60191700 | 1.47881000  |
| C | -4.02248400 | -3.03508200 | -0.32797500 |
| H | -4.28579200 | -0.97946200 | -0.96086900 |
| H | -2.63163100 | -1.55382900 | -1.07350700 |
| C | -4.33994100 | -3.66744300 | -1.68628500 |
| H | -3.25744000 | -3.63352200 | 0.18726800  |
| H | -4.91370900 | -3.06700500 | 0.31366300  |
| H | -4.68600400 | -4.70059200 | -1.57858000 |
| H | -5.12215300 | -3.10516100 | -2.20873500 |
| H | -3.45414800 | -3.67651300 | -2.33209600 |
| C | 0.63609000  | 4.13983800  | -0.20184200 |
| C | -0.66643700 | 4.13472400  | 0.19774800  |
| H | 1.15770500  | 5.07919200  | -0.36624500 |
| H | -1.19698100 | 5.06996200  | 0.35723500  |
| H | -0.50154000 | -2.37843300 | 0.63248100  |
| H | -0.68279800 | -2.42046700 | -0.16712900 |

<sup>3</sup>TS<sub>D-E</sub>

|    |             |             |             |
|----|-------------|-------------|-------------|
| C  | 2.54888200  | -0.37506700 | -1.03023000 |
| C  | 1.07882400  | 1.31335400  | -0.30935900 |
| N  | 1.33866900  | -0.02417000 | -0.53342000 |
| C  | -0.20821700 | 1.64024900  | 0.18266700  |
| C  | -0.53926400 | 2.99181400  | 0.47282400  |
| C  | -1.82512000 | 3.24987000  | 0.96792000  |
| C  | -2.33004100 | 0.87753200  | 0.83300400  |
| C  | -2.71096900 | 2.18779000  | 1.14770200  |
| H  | -2.12145400 | 4.26796400  | 1.20421500  |
| H  | -3.71326100 | 2.36370300  | 1.52411400  |
| N  | -1.09448900 | 0.59898700  | 0.35939800  |
| Ni | -0.20541100 | -1.17064600 | -0.07142500 |
| H  | -0.99064300 | -2.05912400 | -0.95391400 |
| H  | -1.06889400 | -2.23647200 | 0.49904700  |
| C  | 3.53238200  | 0.58178100  | -1.29265400 |
| C  | 2.04285700  | 2.32945600  | -0.54452500 |
| C  | 3.29253700  | 1.93607800  | -1.04476500 |
| C  | 0.45152500  | 4.00590100  | 0.23717000  |
| C  | 1.68380100  | 3.69060700  | -0.25371600 |
| H  | 0.19379100  | 5.03836100  | 0.45759400  |
| H  | 2.42198300  | 4.46772500  | -0.43243300 |
| H  | 4.05775700  | 2.68149200  | -1.24081100 |
| H  | 4.48868700  | 0.25404100  | -1.68737400 |
| C  | 2.81225000  | -1.84334800 | -1.24928600 |
| C  | 3.48950100  | -2.53400400 | -0.04482900 |
| H  | 3.45157200  | -1.96039000 | -2.13160400 |
| H  | 1.86206100  | -2.34519400 | -1.47507600 |
| C  | 2.63742300  | -2.56033600 | 1.22896800  |
| H  | 3.73885200  | -3.56326500 | -0.33528100 |

|   |             |             |             |
|---|-------------|-------------|-------------|
| H | 4.44268900  | -2.02996900 | 0.16488100  |
| C | 3.32570100  | -3.29141800 | 2.38527000  |
| H | 2.39746000  | -1.53389000 | 1.53101300  |
| H | 1.67312200  | -3.04115800 | 1.00905200  |
| H | 2.69763500  | -3.29866300 | 3.28169500  |
| H | 3.54464500  | -4.33242900 | 2.12100800  |
| H | 4.27518400  | -2.80930400 | 2.64548000  |
| C | -3.29460000 | -0.26918800 | 0.95646200  |
| C | -3.85030600 | -0.71466800 | -0.41026300 |
| H | -4.12125700 | 0.01206400  | 1.61881000  |
| H | -2.76913100 | -1.11577600 | 1.41491200  |
| C | -4.71783000 | -1.97263900 | -0.31215600 |
| H | -4.43081100 | 0.10728800  | -0.85118900 |
| H | -3.00580300 | -0.90477300 | -1.08231900 |
| C | -5.26778900 | -2.41756800 | -1.67064900 |
| H | -4.11918200 | -2.78233900 | 0.12607100  |
| H | -5.54941900 | -1.79245900 | 0.38358300  |
| H | -5.88121200 | -3.32012300 | -1.58013200 |
| H | -5.88910900 | -1.63470400 | -2.12105400 |
| H | -4.45228100 | -2.63540000 | -2.36958000 |

<sup>3</sup>E

|    |             |             |             |
|----|-------------|-------------|-------------|
| C  | 2.49911900  | -0.39934000 | -1.05126900 |
| C  | 1.01808000  | 1.29621400  | -0.35092000 |
| N  | 1.28478900  | -0.04384100 | -0.59579600 |
| C  | -0.27297500 | 1.63665300  | 0.11621200  |
| C  | -0.59716300 | 2.99295300  | 0.41122200  |
| C  | -1.89086200 | 3.27420000  | 0.86312500  |
| C  | -2.43382000 | 0.91389800  | 0.74098100  |
| C  | -2.81136700 | 2.22386300  | 1.02036300  |
| H  | -2.17512200 | 4.29813800  | 1.08762600  |
| H  | -3.82354500 | 2.42202800  | 1.35701200  |
| N  | -1.18838300 | 0.61310000  | 0.30161000  |
| Ni | -0.22018000 | -1.06883500 | 0.12248200  |
| C  | 3.50796700  | 0.54578900  | -1.26996400 |
| C  | 2.01515600  | 2.30091100  | -0.53224000 |
| C  | 3.26928700  | 1.89952000  | -1.00206700 |
| C  | 0.42362900  | 3.99043400  | 0.22147100  |
| C  | 1.66792200  | 3.66174300  | -0.22729000 |
| H  | 0.17752900  | 5.02447000  | 0.44894600  |
| H  | 2.42483600  | 4.42971000  | -0.36413400 |
| H  | 4.04739800  | 2.64071000  | -1.16252500 |
| H  | 4.46784800  | 0.21448900  | -1.65204400 |
| C  | 2.74540000  | -1.87072400 | -1.28097300 |
| C  | 3.46497500  | -2.55716900 | -0.10113500 |
| H  | 3.34450500  | -1.99605800 | -2.19016800 |
| H  | 1.78064700  | -2.36317700 | -1.46133000 |
| C  | 2.65283800  | -2.57398400 | 1.19851200  |
| H  | 3.70882500  | -3.58767600 | -0.39178200 |
| H  | 4.42190400  | -2.04788300 | 0.07641000  |
| C  | 3.36929500  | -3.30030500 | 2.34017200  |
| H  | 2.41946300  | -1.54578300 | 1.49904700  |
| H  | 1.67972300  | -3.05485300 | 1.00698600  |

|   |             |             |             |
|---|-------------|-------------|-------------|
| H | 2.76600300  | -3.30071900 | 3.25357700  |
| H | 3.58069000  | -4.34302600 | 2.07648700  |
| H | 4.32545500  | -2.81713600 | 2.57174400  |
| C | -3.37636100 | -0.25091200 | 0.88157400  |
| C | -3.72951600 | -0.90523200 | -0.46723100 |
| H | -4.29163900 | 0.06725200  | 1.39256000  |
| H | -2.89320800 | -1.00794700 | 1.52123900  |
| C | -4.64332900 | -2.12560500 | -0.32054700 |
| H | -4.20470900 | -0.15768300 | -1.11641600 |
| H | -2.79703500 | -1.19920000 | -0.97036800 |
| C | -4.97291400 | -2.78479400 | -1.66332600 |
| H | -4.16169300 | -2.85832400 | 0.34198000  |
| H | -5.57309900 | -1.82575500 | 0.18232500  |
| H | -5.62499200 | -3.65496200 | -1.53499000 |
| H | -5.48103200 | -2.08153400 | -2.33292900 |
| H | -4.06070300 | -3.12118100 | -2.16946000 |

<sup>1</sup>F

|    |             |             |             |
|----|-------------|-------------|-------------|
| C  | 3.48018800  | 1.78837900  | 3.40918400  |
| C  | 3.86763400  | -0.84030400 | 0.21477100  |
| C  | 5.14031200  | -1.18750900 | -0.29272300 |
| C  | 5.17147900  | -2.11777800 | -1.35629400 |
| C  | 3.98762900  | -2.64783500 | -1.82166600 |
| C  | 2.74601200  | -2.24002600 | -1.27527000 |
| N  | 2.69712100  | -1.31608900 | -0.30333600 |
| H  | 6.12457600  | -2.41292300 | -1.78668400 |
| H  | 3.98271700  | -3.38280600 | -2.61983400 |
| C  | 3.76086900  | 0.05678500  | 1.32728200  |
| C  | 4.92804800  | 0.64283800  | 1.86803600  |
| C  | 4.75373900  | 1.53916200  | 2.94549500  |
| C  | 2.35570000  | 1.15454600  | 2.82801200  |
| N  | 2.49890500  | 0.29817100  | 1.80319700  |
| H  | 5.61868900  | 2.01620800  | 3.39795400  |
| H  | 3.31568900  | 2.47005000  | 4.23769000  |
| Ni | 1.12467600  | -0.44498200 | 0.55914900  |
| C  | 1.46226100  | -2.86723600 | -1.72401600 |
| H  | 0.64111700  | -2.17159600 | -1.54048300 |
| C  | 0.97618000  | 1.47064800  | 3.34374800  |
| H  | 0.29273900  | 0.70371200  | 2.97698800  |
| C  | 0.47102700  | 2.86566600  | 2.89874500  |
| H  | 1.03517300  | 3.64944300  | 3.42436600  |
| C  | 1.15087600  | -4.18030000 | -0.96457100 |
| H  | 0.17261800  | -4.51628400 | -1.32216800 |
| H  | -0.57037100 | 2.96138400  | 3.23284900  |
| C  | 0.55036400  | 3.10601900  | 1.38586400  |
| H  | 0.14026600  | 2.23810400  | 0.86110100  |
| H  | 1.60445100  | 3.16172100  | 1.08714000  |
| H  | 1.87884600  | -4.95518000 | -1.24399800 |
| C  | 1.11482100  | -4.02916700 | 0.56210100  |
| H  | 0.56338900  | -3.11721800 | 0.81538800  |
| H  | 2.13458300  | -3.89743900 | 0.94901900  |
| C  | 6.30866100  | -0.58609200 | 0.28104500  |
| H  | 7.28053200  | -0.84914900 | -0.12683700 |

|    |             |             |             |
|----|-------------|-------------|-------------|
| C  | 6.20535600  | 0.30136400  | 1.31299000  |
| H  | 7.09339400  | 0.75990600  | 1.73857800  |
| H  | 0.99074700  | 1.42966500  | 4.44003800  |
| H  | 1.50132000  | -3.07223800 | -2.79935600 |
| C  | -0.17375200 | 4.38060000  | 0.94700100  |
| H  | -0.06010500 | 4.54798300  | -0.12875100 |
| H  | -1.24822900 | 4.31445000  | 1.15513500  |
| H  | 0.21248900  | 5.26509100  | 1.46828000  |
| C  | 0.44108100  | -5.22595100 | 1.23894200  |
| H  | 0.45460400  | -5.12617600 | 2.32977000  |
| H  | -0.60340400 | -5.29825000 | 0.91827700  |
| H  | 0.94218900  | -6.16789600 | 0.98279800  |
| C  | -0.04261800 | 2.85827700  | -3.24537800 |
| C  | -2.94379400 | 1.98597800  | -0.37512700 |
| C  | -3.96366400 | 2.93049100  | -0.09451100 |
| C  | -4.90332500 | 2.57842400  | 0.89874100  |
| C  | -4.77773600 | 1.37492400  | 1.55471100  |
| C  | -3.73503900 | 0.47732700  | 1.21065500  |
| N  | -2.87412200 | 0.77511000  | 0.23426400  |
| H  | -5.70980500 | 3.26558400  | 1.14095700  |
| H  | -5.48017000 | 1.09671000  | 2.33191100  |
| C  | -1.92069700 | 2.30754000  | -1.33705300 |
| C  | -2.01843200 | 3.52366400  | -2.05787500 |
| C  | -1.03772000 | 3.78388000  | -3.03734100 |
| C  | 0.03076500  | 1.68433700  | -2.46355400 |
| N  | -0.87869600 | 1.42157700  | -1.50512500 |
| H  | -1.08356600 | 4.70141400  | -3.61727900 |
| H  | 0.71585900  | 3.02133100  | -4.00343000 |
| H  | -0.11641500 | 0.12091100  | 1.13695300  |
| Ni | -1.01637100 | -0.19126600 | -0.41193300 |
| C  | -3.51537400 | -0.79717600 | 1.99097000  |
| H  | -2.84824500 | -1.43912600 | 1.41853900  |
| C  | 1.14545900  | 0.70579600  | -2.72149300 |
| H  | 1.05264400  | -0.08994800 | -1.98255600 |
| C  | 2.56121400  | 1.31344500  | -2.65563500 |
| H  | 2.76598700  | 1.92708700  | -3.54381400 |
| C  | -4.77832100 | -1.56977600 | 2.40638500  |
| H  | -4.45806900 | -2.41565400 | 3.02800400  |
| H  | 3.27607900  | 0.48127600  | -2.69187600 |
| C  | 2.80331100  | 2.14464200  | -1.39071700 |
| H  | 2.44071100  | 1.57901800  | -0.52690300 |
| H  | 2.18680700  | 3.05137800  | -1.42851000 |
| H  | -5.41511500 | -0.95312900 | 3.05750900  |
| C  | -5.60227200 | -2.09783300 | 1.22638200  |
| H  | -4.97217800 | -2.74806600 | 0.61220000  |
| H  | -5.88845900 | -1.26137200 | 0.57515000  |
| C  | -4.00852500 | 4.16653200  | -0.81469400 |
| H  | -4.80371400 | 4.87193000  | -0.58997400 |
| C  | -3.07990100 | 4.44321600  | -1.77226900 |
| H  | -3.11938400 | 5.37251500  | -2.33327500 |
| H  | 0.98142000  | 0.25036600  | -3.70738000 |
| H  | -2.95549300 | -0.51200800 | 2.89488600  |
| C  | 4.27039800  | 2.52782900  | -1.19084600 |
| H  | 4.40483600  | 3.12259700  | -0.28115100 |

|    |             |             |             |
|----|-------------|-------------|-------------|
| H  | 4.90150300  | 1.63760500  | -1.09849200 |
| H  | 4.64758000  | 3.11657700  | -2.03557600 |
| C  | -6.85554700 | -2.85124500 | 1.68014700  |
| H  | -7.42784700 | -3.22398500 | 0.82447200  |
| H  | -6.59297700 | -3.71360100 | 2.30431700  |
| H  | -7.51867600 | -2.20698800 | 2.27114900  |
| O  | -1.38044600 | -2.06809000 | -0.04668000 |
| Cl | -2.34388300 | -2.77396900 | -1.08363700 |
| O  | -3.53588900 | -1.91281100 | -1.29438000 |
| O  | -1.59832600 | -2.97171800 | -2.35377000 |
| O  | -2.70162800 | -4.06318400 | -0.44858900 |

<sup>2</sup>G

|    |             |             |             |
|----|-------------|-------------|-------------|
| C  | 2.51506000  | 0.61228600  | 0.16177000  |
| C  | 3.77317300  | 1.25231400  | 0.16881000  |
| C  | 3.78923500  | 2.61130900  | 0.55860600  |
| H  | 4.73029900  | 3.15392700  | 0.57973800  |
| C  | 2.60785700  | 3.23494200  | 0.90859500  |
| H  | 2.59849200  | 4.27731000  | 1.20884700  |
| C  | 1.38691500  | 2.52180200  | 0.88490300  |
| C  | 2.40897600  | -0.76477600 | -0.23560400 |
| C  | 3.56744500  | -1.48057300 | -0.60672600 |
| C  | 3.38054000  | -2.82964700 | -0.98619800 |
| C  | 0.99456200  | -2.58038900 | -0.60626400 |
| C  | 2.10979100  | -3.36789100 | -0.98266600 |
| H  | 4.23707200  | -3.43004200 | -1.28033600 |
| H  | 1.94478700  | -4.39989200 | -1.27327200 |
| N  | 1.16187600  | -1.30536100 | -0.23766400 |
| N  | 1.35998200  | 1.23567900  | 0.51542500  |
| Ni | -0.22029500 | 0.04856400  | 0.32790400  |
| C  | 0.06394600  | 3.15260600  | 1.22196600  |
| C  | -0.77065200 | 3.47137200  | -0.03970700 |
| H  | 0.21747900  | 4.06132200  | 1.81386500  |
| H  | -0.49956200 | 2.44649600  | 1.84539300  |
| C  | -2.22540200 | 3.82054000  | 0.29365100  |
| H  | -0.29464400 | 4.29470600  | -0.58941400 |
| H  | -0.76595400 | 2.60058200  | -0.70522300 |
| C  | -3.04572400 | 4.14589200  | -0.95762400 |
| H  | -2.68322700 | 2.96568600  | 0.80681900  |
| H  | -2.25077000 | 4.66576400  | 0.99611100  |
| H  | -4.08138400 | 4.38487400  | -0.69708500 |
| H  | -2.62554200 | 5.00409900  | -1.49597000 |
| H  | -3.06086900 | 3.28635200  | -1.63344300 |
| C  | -0.40402800 | -3.13152200 | -0.56526500 |
| C  | -0.90030000 | -3.35366300 | 0.87997800  |
| H  | -0.44618600 | -4.07348800 | -1.12266000 |
| H  | -1.08199800 | -2.42635300 | -1.06000100 |
| C  | -2.35998100 | -3.81527800 | 0.93005600  |
| H  | -0.25031700 | -4.08260700 | 1.38437100  |
| H  | -0.80536800 | -2.40877000 | 1.42937600  |
| C  | -2.86935300 | -3.96896400 | 2.36589100  |
| H  | -2.97587400 | -3.08521600 | 0.39414800  |
| H  | -2.45968000 | -4.76937900 | 0.39387700  |

|    |             |             |             |
|----|-------------|-------------|-------------|
| H  | -3.91153800 | -4.30330000 | 2.38442500  |
| H  | -2.27308000 | -4.69809200 | 2.92785900  |
| H  | -2.81700300 | -3.01240200 | 2.89802700  |
| C  | 4.93551700  | 0.50112000  | -0.21361400 |
| C  | 4.83680000  | -0.80991900 | -0.58301600 |
| H  | 5.90063700  | 0.99928600  | -0.20370500 |
| H  | 5.72269900  | -1.36856800 | -0.87098100 |
| Cl | -3.01602000 | 0.08345300  | -0.74714500 |
| O  | -2.12508200 | -0.14868400 | 0.54391200  |
| O  | -2.18381500 | 0.82731900  | -1.73681800 |
| O  | -3.38358000 | -1.25818800 | -1.26119500 |
| O  | -4.18841300 | 0.86675700  | -0.31342500 |

<sup>2</sup>H

|    |             |             |             |
|----|-------------|-------------|-------------|
| C  | 3.10762100  | 1.31958100  | -1.39692500 |
| C  | -0.69495600 | 1.34379500  | 0.29867200  |
| C  | -1.35553800 | 2.56308500  | 0.57874900  |
| C  | -2.64541400 | 2.47201600  | 1.14865300  |
| C  | -3.18867200 | 1.22984400  | 1.39469100  |
| C  | -2.46209400 | 0.05291900  | 1.08536600  |
| N  | -1.23737700 | 0.12132900  | 0.55341000  |
| H  | -3.19449400 | 3.37933400  | 1.38610900  |
| H  | -4.17925300 | 1.13144200  | 1.82704100  |
| C  | 0.61549000  | 1.36175000  | -0.28836200 |
| C  | 1.24109800  | 2.59797500  | -0.57227100 |
| C  | 2.53112500  | 2.54749500  | -1.14594600 |
| C  | 2.41902600  | 0.12478400  | -1.08820400 |
| N  | 1.19330100  | 0.15057600  | -0.54302800 |
| H  | 3.05262300  | 3.47011500  | -1.38506000 |
| H  | 4.09760800  | 1.25039800  | -1.83642900 |
| H  | -0.28769400 | -2.92200800 | 0.33303200  |
| Ni | 0.07751700  | -1.42613700 | 0.03951800  |
| C  | -3.07446400 | -1.30456100 | 1.29493100  |
| H  | -2.26711000 | -2.03813900 | 1.37559800  |
| C  | 3.07028000  | -1.21349800 | -1.31914600 |
| H  | 2.29010900  | -1.97788000 | -1.40326600 |
| C  | 4.05237500  | -1.60229400 | -0.18958900 |
| H  | 4.86737100  | -0.86546700 | -0.14838600 |
| C  | -4.01256400 | -1.70902600 | 0.13274800  |
| H  | -4.42827200 | -2.69672700 | 0.37060500  |
| H  | 4.51533400  | -2.55974900 | -0.46138300 |
| C  | 3.39877400  | -1.72523900 | 1.19155700  |
| H  | 2.54779900  | -2.41567500 | 1.13051100  |
| H  | 2.97002400  | -0.75769000 | 1.48170500  |
| H  | -4.86593700 | -1.01658300 | 0.08704700  |
| C  | -3.31700400 | -1.76573300 | -1.23278300 |
| H  | -2.41337700 | -2.38171600 | -1.14721800 |
| H  | -2.96682900 | -0.76211800 | -1.50690200 |
| C  | -0.69879300 | 3.80195600  | 0.27890200  |
| H  | -1.21668600 | 4.73067300  | 0.50172000  |
| C  | 0.54904800  | 3.81846200  | -0.27340600 |
| H  | 1.04107500  | 4.76048900  | -0.49866200 |
| H  | 3.61140800  | -1.18694100 | -2.27248200 |

|   |             |             |             |
|---|-------------|-------------|-------------|
| H | -3.64296800 | -1.30092400 | 2.23271200  |
| C | 4.38440800  | -2.19457200 | 2.26520100  |
| H | 3.89857800  | -2.27006100 | 3.24317900  |
| H | 4.79521300  | -3.18095300 | 2.02041900  |
| H | 5.22801100  | -1.50040700 | 2.36287500  |
| C | -4.23504000 | -2.30543200 | -2.33299300 |
| H | -3.72559500 | -2.32603000 | -3.30196300 |
| H | -4.56212900 | -3.32714700 | -2.10752700 |
| H | -5.13499200 | -1.68755800 | -2.44152100 |

<sup>2</sup>PR1

|   |             |             |             |
|---|-------------|-------------|-------------|
| C | 2.74744700  | 1.66011000  | -2.36758500 |
| C | 2.39567700  | 2.99547600  | -2.12606200 |
| C | 1.25426600  | 3.27175500  | -1.37934300 |
| C | 0.45084700  | 2.16922800  | -0.93801700 |
| C | 1.93863400  | 0.61946100  | -1.89621500 |
| C | 0.85112000  | 4.59834900  | -1.00140600 |
| C | -0.67302100 | 2.38941600  | -0.12883300 |
| C | -1.02659700 | 3.71293900  | 0.28739400  |
| C | -0.23251700 | 4.80864900  | -0.20466700 |
| C | -2.09909700 | 3.86753700  | 1.16102200  |
| C | -2.78247700 | 2.72193400  | 1.61711500  |
| C | -2.42139300 | 1.45784600  | 1.16313100  |
| H | 1.44729100  | 5.43619500  | -1.35455700 |
| H | 3.66599100  | 1.41252100  | -2.88894500 |
| H | -0.51312000 | 5.81673600  | 0.09011900  |
| H | -3.60374500 | 2.81199000  | 2.32025900  |
| N | 0.77451100  | 0.84741200  | -1.25144600 |
| N | -1.39919900 | 1.27229200  | 0.28598200  |
| H | -2.38565800 | 4.85866000  | 1.50063400  |
| H | 3.01939200  | 3.80964400  | -2.48551800 |
| C | -1.18145100 | -2.94668900 | -2.34470700 |
| H | -1.76327700 | -3.28941900 | -3.21113500 |
| H | -0.22575600 | -3.48385700 | -2.39643600 |
| C | -1.92725600 | -3.37534400 | -1.06438100 |
| H | -2.75725500 | -2.68612400 | -0.88915500 |
| H | -2.36898100 | -4.36694500 | -1.22166000 |
| C | -1.06138500 | -3.47383600 | 0.20890300  |
| H | -0.54398500 | -4.43731000 | 0.24472600  |
| H | -1.69516900 | -3.39440000 | 1.09758400  |
| S | 0.24956200  | -2.16939600 | 0.34923300  |
| C | 0.29795000  | -1.87235000 | 2.17770400  |
| H | -0.66717100 | -1.45187600 | 2.47323300  |
| H | 0.44150400  | -2.83478500 | 2.67682500  |
| C | 1.43714500  | -0.92547200 | 2.45084200  |
| C | 2.66924700  | -1.40044300 | 2.91599500  |
| C | 1.30012600  | 0.43632100  | 2.14772100  |
| C | 3.74876200  | -0.52911900 | 3.07317400  |
| H | 2.78729300  | -2.45696500 | 3.14403100  |
| C | 2.38196300  | 1.30406800  | 2.28967900  |
| H | 0.35379200  | 0.80252400  | 1.76719800  |
| C | 3.60945200  | 0.82296300  | 2.75154900  |
| H | 4.70025800  | -0.90914000 | 3.43368800  |

|    |             |             |             |
|----|-------------|-------------|-------------|
| H  | 2.26272700  | 2.35091700  | 2.02679000  |
| H  | 4.45423900  | 1.49717400  | 2.85898900  |
| C  | -3.19665400 | 0.24887400  | 1.62318200  |
| C  | -4.34216700 | -0.13334100 | 0.66782500  |
| H  | -3.60506300 | 0.43599700  | 2.62317100  |
| H  | -2.50859300 | -0.59962300 | 1.70267500  |
| C  | -4.97650700 | -1.48390500 | 1.01387300  |
| H  | -5.10385500 | 0.65689900  | 0.68211600  |
| H  | -3.94765500 | -0.16703700 | -0.35361500 |
| C  | -6.07399100 | -1.89679100 | 0.02902400  |
| H  | -4.18966300 | -2.25196600 | 1.02744000  |
| H  | -5.38381700 | -1.44884800 | 2.03361900  |
| H  | -6.51266000 | -2.86439700 | 0.29428900  |
| H  | -6.88233200 | -1.15726800 | 0.00660800  |
| H  | -5.67468000 | -1.97797100 | -0.98900300 |
| C  | 2.46041200  | -0.79329600 | -1.99929300 |
| C  | 3.47473500  | -1.09031500 | -0.87638500 |
| H  | 2.94492800  | -0.94047000 | -2.97275500 |
| H  | 1.64452800  | -1.51037700 | -1.92691600 |
| C  | 3.95244600  | -2.54536100 | -0.88729200 |
| H  | 4.33216100  | -0.41209300 | -0.97614800 |
| H  | 3.01340800  | -0.86060200 | 0.09036500  |
| C  | 5.00763900  | -2.83029700 | 0.18576800  |
| H  | 3.08501300  | -3.20116000 | -0.73479900 |
| H  | 4.35739000  | -2.79075500 | -1.87927800 |
| H  | 5.32438600  | -3.87880000 | 0.17247400  |
| H  | 5.89873900  | -2.20950200 | 0.03627200  |
| H  | 4.61524600  | -2.60497100 | 1.18250600  |
| C  | -1.85657100 | -0.43731600 | -2.50387300 |
| C  | -0.90643400 | -1.45489500 | -2.51242900 |
| H  | -1.64324700 | 0.50867100  | -2.99522400 |
| H  | -2.90723000 | -0.64060800 | -2.31531600 |
| H  | 0.02097400  | -1.23191300 | -3.03104300 |
| Ni | -0.80256200 | -0.31725100 | -0.73693400 |
| H  | -1.95688200 | -0.96027500 | -0.25991100 |

## <sup>2</sup>Ts1

|   |             |             |             |
|---|-------------|-------------|-------------|
| C | 2.94607200  | 0.65394700  | -2.56520800 |
| C | 2.81310900  | 2.04426000  | -2.51124900 |
| C | 1.71868500  | 2.59758700  | -1.85029900 |
| C | 0.72775800  | 1.70687500  | -1.32166100 |
| C | 1.97056500  | -0.17139200 | -1.98406800 |
| C | 1.54963600  | 4.00555800  | -1.63384000 |
| C | -0.36217400 | 2.20630300  | -0.59436800 |
| C | -0.47574800 | 3.60590000  | -0.32289600 |
| C | 0.50801700  | 4.48642100  | -0.89905400 |
| C | -1.50374300 | 4.03872300  | 0.51276900  |
| C | -2.39011300 | 3.08252100  | 1.05815500  |
| C | -2.26487300 | 1.73901200  | 0.73228300  |
| H | 2.28978800  | 4.68354700  | -2.05180200 |
| H | 3.82275600  | 0.19404200  | -3.00867800 |
| H | 0.40647400  | 5.55378000  | -0.71896600 |
| H | -3.18760100 | 3.38826500  | 1.72742300  |



|    |             |             |             |
|----|-------------|-------------|-------------|
| N  | 0.84203000  | 0.32099800  | -1.44098400 |
| N  | -1.27897400 | 1.28489300  | -0.09249300 |
| H  | -1.60517900 | 5.09312100  | 0.75187600  |
| H  | 3.57242300  | 2.69373300  | -2.93924900 |
| Ni | -0.88904900 | -0.51174800 | -0.76755000 |
| C  | -1.05167400 | -2.17395400 | -1.93632200 |
| C  | -2.23059000 | -1.39595600 | -2.03486000 |
| H  | -0.31942500 | -2.05402300 | -2.73058200 |
| H  | -2.24279100 | -0.84788700 | -0.46839000 |
| H  | -2.32142300 | -0.64812900 | -2.82050400 |
| H  | -3.19042700 | -1.80446800 | -1.72209400 |
| C  | -1.06543500 | -3.54648300 | -1.26738100 |
| H  | -1.54724400 | -4.25677000 | -1.95461600 |
| H  | -0.03524400 | -3.90604800 | -1.14755400 |
| C  | -1.79451900 | -3.62461400 | 0.09540500  |
| H  | -2.68223900 | -2.98540900 | 0.07337300  |
| H  | -2.15867900 | -4.64741200 | 0.24855500  |
| C  | -0.94891400 | -3.26035700 | 1.33005400  |
| H  | -0.31155600 | -4.10271500 | 1.61766900  |
| H  | -1.60222400 | -3.02733800 | 2.17666600  |
| S  | 0.15468600  | -1.81362900 | 1.03121500  |
| C  | 0.15584700  | -0.92738600 | 2.65625000  |
| H  | -0.82520300 | -0.47272300 | 2.81529400  |
| H  | 0.34258700  | -1.66785500 | 3.44022300  |
| C  | 1.24987400  | 0.10859500  | 2.59181000  |
| C  | 2.59168100  | -0.28043500 | 2.72079400  |
| C  | 0.95495600  | 1.44696700  | 2.31137200  |
| C  | 3.61792000  | 0.64770900  | 2.55572800  |
| H  | 2.82700400  | -1.32099400 | 2.93050000  |
| C  | 1.98216800  | 2.37592500  | 2.13543000  |
| H  | -0.07704800 | 1.76136100  | 2.20485400  |
| C  | 3.31436200  | 1.97833200  | 2.25198200  |
| H  | 4.65265300  | 0.33127700  | 2.65191200  |
| H  | 1.73356100  | 3.40230900  | 1.88442200  |
| H  | 4.11352900  | 2.69900900  | 2.10465300  |
| C  | -3.25956800 | 0.73769000  | 1.26225900  |
| C  | -4.42578300 | 0.48639400  | 0.28483700  |
| H  | -3.66077100 | 1.08727500  | 2.22071700  |
| H  | -2.74045900 | -0.20946200 | 1.45155800  |
| C  | -5.25765000 | -0.74483400 | 0.65464900  |
| H  | -5.06436200 | 1.37840700  | 0.25269500  |
| H  | -4.02245500 | 0.36346200  | -0.72681100 |
| C  | -6.40965900 | -1.00310600 | -0.32081300 |
| H  | -4.59606100 | -1.62297400 | 0.68283500  |
| H  | -5.65091400 | -0.62998000 | 1.67406400  |
| H  | -6.98521900 | -1.89190000 | -0.04178800 |
| H  | -7.09976300 | -0.15235400 | -0.34873100 |
| H  | -6.03347300 | -1.15371100 | -1.33973900 |
| C  | 2.27266600  | -1.64180300 | -1.83488600 |
| C  | 3.32551300  | -1.86880400 | -0.73081500 |
| H  | 2.63628300  | -2.05883300 | -2.78292900 |
| H  | 1.36681800  | -2.17533200 | -1.56040400 |
| C  | 3.49408300  | -3.34684400 | -0.36984100 |
| H  | 4.28825700  | -1.44626500 | -1.04649800 |

|   |            |             |             |
|---|------------|-------------|-------------|
| H | 3.02093600 | -1.31134700 | 0.16166500  |
| C | 4.52728500 | -3.56609300 | 0.73928000  |
| H | 2.52154200 | -3.74213900 | -0.04643200 |
| H | 3.78022600 | -3.91729500 | -1.26460300 |
| H | 4.63143800 | -4.62622700 | 0.99366500  |
| H | 5.51407500 | -3.19516000 | 0.43907700  |
| H | 4.23791100 | -3.02902700 | 1.64998800  |

**<sup>2</sup>IM1**

|    |             |             |             |
|----|-------------|-------------|-------------|
| C  | -3.07192800 | -0.38059800 | -2.57247000 |
| C  | -3.13370300 | -1.76284900 | -2.44704800 |
| C  | -2.11336200 | -2.43394500 | -1.75720100 |
| C  | -1.04054100 | -1.65041600 | -1.24997900 |
| C  | -1.99985600 | 0.33745300  | -2.01439800 |
| C  | -2.10609800 | -3.84758700 | -1.51292000 |
| C  | 0.01460300  | -2.26167600 | -0.52748000 |
| C  | -0.02433400 | -3.65392100 | -0.24941200 |
| C  | -1.11016700 | -4.42963900 | -0.78458900 |
| C  | 0.98311900  | -4.18620600 | 0.57079700  |
| C  | 1.96549700  | -3.32605500 | 1.07106800  |
| C  | 1.96702400  | -1.97149000 | 0.73528600  |
| H  | -2.92277600 | -4.44555700 | -1.90877200 |
| H  | -3.85829200 | 0.16723500  | -3.08162800 |
| H  | -1.12443100 | -5.49829700 | -0.58682800 |
| H  | 2.74926200  | -3.70377900 | 1.72061400  |
| N  | -0.98621500 | -0.28396800 | -1.38653100 |
| N  | 1.01621900  | -1.42960200 | -0.06992900 |
| H  | 0.98303900  | -5.24280500 | 0.82091700  |
| H  | -3.96718800 | -2.32393100 | -2.86118500 |
| Ni | 0.76736800  | 0.48320000  | -0.61432000 |
| C  | 1.68401300  | 1.95839100  | -1.69729200 |
| C  | 3.01875100  | 1.48034100  | -2.29187500 |
| H  | 1.01960900  | 2.16711800  | -2.55000500 |
| H  | 3.77580100  | 1.30947600  | -1.51649600 |
| H  | 2.90025300  | 0.53504700  | -2.83377200 |
| H  | 3.45855000  | 2.21379400  | -2.99156700 |
| C  | 1.88895800  | 3.28276300  | -0.93307500 |
| H  | 2.56690800  | 3.95525700  | -1.48695500 |
| H  | 0.93688600  | 3.82911200  | -0.85260100 |
| C  | 2.46687400  | 3.07741400  | 0.48946200  |
| H  | 3.07292900  | 2.16473800  | 0.48726400  |
| H  | 3.13849800  | 3.89984200  | 0.76901300  |
| C  | 1.41687600  | 2.97614200  | 1.60333800  |
| H  | 0.98825100  | 3.96007200  | 1.81778800  |
| H  | 1.85869500  | 2.59084600  | 2.52809800  |
| S  | -0.00710300 | 1.87213200  | 1.16513300  |
| C  | -0.25035700 | 0.89921500  | 2.72396300  |
| H  | 0.64858200  | 0.30575700  | 2.91101700  |
| H  | -0.38805500 | 1.61071800  | 3.54446800  |
| C  | -1.46201800 | 0.02489200  | 2.52722100  |
| C  | -2.74548800 | 0.59135200  | 2.52766100  |
| C  | -1.32386800 | -1.34008700 | 2.25576800  |
| C  | -3.86466500 | -0.18773700 | 2.23972000  |

|   |             |             |             |
|---|-------------|-------------|-------------|
| H | -2.85994700 | 1.65291500  | 2.73180500  |
| C | -2.44307100 | -2.12118100 | 1.96228300  |
| H | -0.33698900 | -1.79083200 | 2.24925700  |
| C | -3.71396800 | -1.54611800 | 1.94633500  |
| H | -4.85144600 | 0.26622500  | 2.23460600  |
| H | -2.31363900 | -3.17172200 | 1.72197400  |
| H | -4.58304200 | -2.15147100 | 1.70559500  |
| C | 3.07274700  | -1.05842300 | 1.19533900  |
| C | 4.23632400  | -1.02948600 | 0.18589800  |
| H | 3.44363700  | -1.38418100 | 2.17489300  |
| H | 2.67158400  | -0.04429200 | 1.31982600  |
| C | 5.35292500  | -0.05587700 | 0.57456000  |
| H | 4.64723500  | -2.04347900 | 0.09109000  |
| H | 3.83546100  | -0.76189600 | -0.79744800 |
| C | 6.48594600  | -0.01979900 | -0.45532100 |
| H | 4.93081200  | 0.95136900  | 0.68759400  |
| H | 5.75214100  | -0.33267100 | 1.56035100  |
| H | 7.27535000  | 0.67917800  | -0.16022200 |
| H | 6.94171700  | -1.00953300 | -0.57448900 |
| H | 6.10961700  | 0.29260700  | -1.43558700 |
| C | -2.00844900 | 1.84255900  | -2.00988200 |
| C | -2.90380500 | 2.38593200  | -0.87701500 |
| H | -2.36253900 | 2.22420000  | -2.97597800 |
| H | -0.98647800 | 2.19938200  | -1.86750900 |
| C | -2.70880900 | 3.88488600  | -0.63627700 |
| H | -3.95727500 | 2.17407900  | -1.10550200 |
| H | -2.67340100 | 1.84196300  | 0.04453300  |
| C | -3.55855300 | 4.40626900  | 0.52596400  |
| H | -1.64756000 | 4.06957600  | -0.42389800 |
| H | -2.94396700 | 4.44231300  | -1.55337800 |
| H | -3.40935200 | 5.47903500  | 0.68751000  |
| H | -4.62665300 | 4.24060300  | 0.34273600  |
| H | -3.29817200 | 3.88794500  | 1.45634800  |

## <sup>2</sup>TS2

|   |             |            |             |
|---|-------------|------------|-------------|
| C | 3.49927900  | 2.73677100 | 0.94223300  |
| C | 2.66032900  | 3.83027300 | 1.10789900  |
| C | 1.33891900  | 3.75107800 | 0.63823100  |
| C | 0.93803300  | 2.53952600 | 0.01354300  |
| C | 3.03452600  | 1.56588800 | 0.32275400  |
| C | 0.38697100  | 4.81932900 | 0.75576800  |
| C | -0.38742500 | 2.40223900 | -0.49184000 |
| C | -1.31412300 | 3.46798900 | -0.34886500 |
| C | -0.88429700 | 4.68321500 | 0.28331100  |
| C | -2.61858500 | 3.25472700 | -0.82281400 |
| C | -2.94212700 | 2.02176300 | -1.37015700 |
| C | -1.98075000 | 1.00278300 | -1.47403100 |
| H | 0.70345100  | 5.74231000 | 1.23401700  |
| H | 4.52608600  | 2.77005100 | 1.29259800  |
| H | -1.60064600 | 5.49439200 | 0.38168000  |
| H | -3.95240500 | 1.82518900 | -1.70989300 |
| N | 1.77005900  | 1.45989300 | -0.13630100 |
| N | -0.70577400 | 1.20032900 | -1.07573200 |

|    |             |             |             |
|----|-------------|-------------|-------------|
| H  | -3.36280800 | 4.04172500  | -0.73961300 |
| H  | 3.01171900  | 4.73747800  | 1.59118600  |
| C  | -2.33402500 | -0.35450900 | -2.03480700 |
| C  | -3.71953000 | -0.89630400 | -1.63908400 |
| H  | -1.56795600 | -1.05954000 | -1.69977600 |
| H  | -2.26343500 | -0.30303800 | -3.12846500 |
| C  | -3.91703900 | -1.03230500 | -0.12618100 |
| H  | -4.51587600 | -0.26986400 | -2.06523400 |
| H  | -3.83573600 | -1.88072600 | -2.11099500 |
| C  | -5.27057300 | -1.63665700 | 0.25096000  |
| H  | -3.11097200 | -1.64868200 | 0.28338400  |
| H  | -3.80896000 | -0.05183300 | 0.35004700  |
| H  | -5.37098400 | -1.71763300 | 1.33809100  |
| H  | -6.10083600 | -1.02231000 | -0.11874900 |
| H  | -5.38972700 | -2.64120100 | -0.17221600 |
| C  | 3.91958300  | 0.35534600  | 0.19829000  |
| C  | 3.68163000  | -0.64101400 | 1.35021300  |
| H  | 4.97197400  | 0.66144700  | 0.18322700  |
| H  | 3.70778100  | -0.13397500 | -0.75659000 |
| C  | 4.33901000  | -2.00310200 | 1.11159800  |
| H  | 4.04918300  | -0.20662600 | 2.28943700  |
| H  | 2.60107700  | -0.77531100 | 1.46347600  |
| C  | 4.06447300  | -2.99947000 | 2.24205800  |
| H  | 3.96692900  | -2.41261500 | 0.16296900  |
| H  | 5.42237100  | -1.87313100 | 0.98393900  |
| H  | 4.54182500  | -3.96623100 | 2.05149200  |
| H  | 4.44064100  | -2.62298500 | 3.20001400  |
| H  | 2.98874100  | -3.17434300 | 2.35799500  |
| Ni | 0.85469100  | -0.03467700 | -1.18527200 |
| C  | 1.41252900  | -0.68214700 | -3.06063400 |
| C  | 1.78236700  | -1.67567600 | -2.08699700 |
| H  | 1.49745400  | -1.27327300 | -0.55073300 |
| H  | 2.21213300  | 0.00194500  | -3.35016700 |
| C  | 0.37946100  | -0.88649000 | -4.14855800 |
| H  | -0.04869200 | 0.07227600  | -4.46134500 |
| H  | 0.81203900  | -1.35540900 | -5.04734500 |
| H  | -0.45238200 | -1.51669900 | -3.82778400 |
| H  | 2.84919600  | -1.72675600 | -1.85670400 |
| C  | 1.15502200  | -3.06922000 | -2.09387800 |
| C  | 0.97543300  | -3.74692700 | -0.72512300 |
| H  | 1.80374000  | -3.70548000 | -2.71311900 |
| H  | 0.18553400  | -3.04839100 | -2.59829900 |
| H  | 0.94120000  | -4.83378700 | -0.84448600 |
| H  | 1.80864800  | -3.51632000 | -0.05447000 |
| S  | -0.59910800 | -3.23320400 | 0.09926400  |
| C  | -0.00455600 | -2.51641800 | 1.70218900  |
| H  | 0.92689200  | -1.99527300 | 1.47874900  |
| H  | 0.19104700  | -3.32965800 | 2.40767200  |
| C  | -1.02631800 | -1.55210800 | 2.24565500  |
| C  | -2.12665300 | -2.00792900 | 2.98279000  |
| C  | -0.90962700 | -0.18072500 | 1.97946300  |
| C  | -3.09400000 | -1.11143700 | 3.44165000  |
| H  | -2.22787500 | -3.07027200 | 3.19088600  |
| C  | -1.87360500 | 0.71662900  | 2.43771500  |

|   |             |             |            |
|---|-------------|-------------|------------|
| H | -0.07040500 | 0.17102800  | 1.38856900 |
| C | -2.97040300 | 0.25297000  | 3.16893700 |
| H | -3.94287500 | -1.47829700 | 4.01196600 |
| H | -1.77118500 | 1.77433500  | 2.21142400 |
| H | -3.72508500 | 0.94961200  | 3.52309600 |

**<sup>2</sup>IM2**

|   |             |             |             |
|---|-------------|-------------|-------------|
| C | 2.12833400  | 2.50412400  | -2.26905100 |
| C | 1.29261300  | 3.61402800  | -2.03036200 |
| C | 0.14247400  | 3.43411600  | -1.26532000 |
| C | -0.18852600 | 2.10843300  | -0.84412200 |
| C | 1.78481100  | 1.24240100  | -1.79540200 |
| C | -0.71650300 | 4.51092900  | -0.84648100 |
| C | -1.31198500 | 1.88066800  | -0.03698400 |
| C | -2.10659100 | 2.97250000  | 0.43712400  |
| C | -1.77942000 | 4.29363000  | -0.02294700 |
| C | -3.13192300 | 2.69058400  | 1.33694700  |
| C | -3.33867700 | 1.36702400  | 1.74739600  |
| C | -2.57632800 | 0.32518400  | 1.20236200  |
| H | -0.47712100 | 5.51654600  | -1.18301200 |
| H | 3.07824400  | 2.63266700  | -2.77792800 |
| H | -2.39834000 | 5.12281000  | 0.31072500  |
| H | -4.10633800 | 1.12596600  | 2.47402500  |
| N | 0.60122600  | 1.00012800  | -1.16715200 |
| N | -1.60199200 | 0.56115800  | 0.29947800  |
| H | -3.74624300 | 3.49650300  | 1.72941400  |
| H | 1.56446600  | 4.60384800  | -2.38503600 |
| C | -2.86133000 | -1.09941000 | 1.61494600  |
| C | -3.87721000 | -1.82476500 | 0.70676500  |
| H | -3.24461300 | -1.09318700 | 2.64236300  |
| H | -1.92146200 | -1.65730600 | 1.61892200  |
| C | -5.28619600 | -1.22343700 | 0.70945100  |
| H | -3.48677700 | -1.82961100 | -0.31669300 |
| H | -3.93002200 | -2.87551100 | 1.02327100  |
| C | -6.24382300 | -1.97998000 | -0.21631100 |
| H | -5.68270800 | -1.22382300 | 1.73467300  |
| H | -5.23271400 | -0.17142500 | 0.40487700  |
| H | -7.24681900 | -1.54063600 | -0.20602700 |
| H | -5.88208500 | -1.96187000 | -1.25124900 |
| H | -6.33591700 | -3.03114200 | 0.08143400  |
| C | 2.80794800  | 0.12933600  | -1.86186400 |
| C | 4.05134100  | 0.42294700  | -0.99905000 |
| H | 3.12454600  | -0.03929600 | -2.90039500 |
| H | 2.35024700  | -0.79362200 | -1.50630200 |
| C | 5.11960100  | -0.67249100 | -1.10158400 |
| H | 4.48959100  | 1.38368700  | -1.29335500 |
| H | 3.73644000  | 0.54387000  | 0.04598300  |
| C | 6.29768700  | -0.44026600 | -0.15116400 |
| H | 4.66832800  | -1.65231500 | -0.88944600 |
| H | 5.47904300  | -0.72843900 | -2.13815400 |
| H | 7.05734200  | -1.22240900 | -0.25132100 |
| H | 6.78023000  | 0.52300700  | -0.35156100 |
| H | 5.96169500  | -0.42926700 | 0.89201000  |

|    |             |             |             |
|----|-------------|-------------|-------------|
| Ni | -0.53744200 | -0.64512900 | -0.84960400 |
| C  | -1.10375900 | -1.03424000 | -2.80860700 |
| C  | 0.04321400  | -1.75736400 | -2.47380500 |
| H  | -1.48024100 | -1.67622500 | -0.58170900 |
| H  | -0.93125000 | -0.07529000 | -3.29872500 |
| C  | -2.50219200 | -1.57006600 | -2.98040600 |
| H  | -3.23718300 | -0.87110900 | -2.57066100 |
| H  | -2.72227400 | -1.69366700 | -4.04970000 |
| H  | -2.64353600 | -2.53470700 | -2.48900700 |
| H  | 0.98443400  | -1.32922600 | -2.80420800 |
| C  | 0.14464400  | -3.21491300 | -2.07862200 |
| C  | 1.17921400  | -3.41132500 | -0.95435100 |
| H  | 0.46701000  | -3.82253500 | -2.93744000 |
| H  | -0.82613400 | -3.60289200 | -1.75811700 |
| H  | 1.27772000  | -4.46561700 | -0.68116800 |
| H  | 2.16062200  | -3.05085300 | -1.28206800 |
| S  | 0.68873200  | -2.42699400 | 0.53456900  |
| C  | 2.32106200  | -1.99356700 | 1.28791400  |
| H  | 2.95814800  | -1.59872400 | 0.49464300  |
| H  | 2.78581300  | -2.89802800 | 1.69020300  |
| C  | 2.09489000  | -0.96647200 | 2.37121800  |
| C  | 1.58908100  | 0.30224200  | 2.04568200  |
| C  | 2.36049700  | -1.26883100 | 3.71132800  |
| C  | 1.35969100  | 1.24794700  | 3.04352700  |
| H  | 1.34762900  | 0.53619400  | 1.01418300  |
| C  | 2.13723300  | -0.31844700 | 4.71034700  |
| H  | 2.74285900  | -2.25203300 | 3.97490300  |
| C  | 1.63498900  | 0.94118100  | 4.37890900  |
| H  | 0.95696400  | 2.21973000  | 2.77292900  |
| H  | 2.35021700  | -0.56556700 | 5.74660300  |
| H  | 1.45506000  | 1.67781700  | 5.15676800  |

### <sup>2</sup>Ts3

|   |             |             |             |
|---|-------------|-------------|-------------|
| C | -1.76957000 | -4.15084600 | 0.70893100  |
| C | -3.07445600 | -4.03294100 | 0.19903400  |
| C | -3.49446800 | -2.80351800 | -0.30035700 |
| C | -2.59818700 | -1.69219600 | -0.19691700 |
| C | -0.93077900 | -3.03620900 | 0.77283000  |
| C | -4.76053400 | -2.58798000 | -0.94939000 |
| C | -2.93270900 | -0.45404400 | -0.75778500 |
| C | -4.15623100 | -0.28012200 | -1.47722000 |
| C | -5.07317500 | -1.38946100 | -1.51560600 |
| C | -4.36767100 | 0.93273500  | -2.12714300 |
| C | -3.36901000 | 1.92477400  | -2.06861300 |
| C | -2.21936500 | 1.72887300  | -1.30393500 |
| H | -5.45739800 | -3.42080300 | -1.00326900 |
| H | -1.38274500 | -5.11447800 | 1.02354600  |
| H | -6.02111100 | -1.25358600 | -2.03030600 |
| H | -3.48393600 | 2.85698700  | -2.61052500 |
| N | -1.34669200 | -1.79803800 | 0.41384500  |
| N | -2.00469500 | 0.57747800  | -0.62190700 |
| H | -5.27822500 | 1.09402200  | -2.69722300 |
| H | -3.73294300 | -4.89571100 | 0.14818200  |

|    |             |             |             |
|----|-------------|-------------|-------------|
| Ni | -0.70874800 | 0.08029000  | 0.75787400  |
| C  | 0.13344400  | -0.22363200 | 2.60117100  |
| C  | -0.75108100 | 0.86958500  | 2.70689100  |
| H  | -0.26419200 | -1.19597700 | 2.87731700  |
| H  | -0.55455900 | 1.47382600  | 1.07523900  |
| H  | -1.79385400 | 0.62099000  | 2.91009500  |
| C  | 1.64643200  | -0.06375700 | 2.71605200  |
| H  | 1.90952300  | 0.45994500  | 3.64639000  |
| H  | 2.10435000  | -1.05551700 | 2.78658800  |
| C  | 2.30552100  | 0.69368400  | 1.55303600  |
| H  | 1.99731800  | 1.74324400  | 1.54101400  |
| H  | 3.39623300  | 0.65556500  | 1.62288200  |
| C  | -1.17568100 | 2.81580900  | -1.20631100 |
| C  | -1.43352600 | 3.83599500  | -0.07745200 |
| H  | -1.12344300 | 3.34922100  | -2.16346900 |
| H  | -0.20604300 | 2.33766000  | -1.04137000 |
| C  | -2.63845200 | 4.75525500  | -0.30281800 |
| H  | -1.57274700 | 3.28741800  | 0.86037400  |
| H  | -0.53087600 | 4.44964500  | 0.05222600  |
| C  | -2.84075900 | 5.74399900  | 0.84952100  |
| H  | -2.50469100 | 5.30590900  | -1.24459300 |
| H  | -3.53996100 | 4.14483900  | -0.42948300 |
| H  | -3.70367600 | 6.39493900  | 0.67505900  |
| H  | -3.00977400 | 5.21476000  | 1.79493200  |
| H  | -1.96055500 | 6.38403200  | 0.98282600  |
| C  | 0.52609000  | -3.23473100 | 1.10656700  |
| C  | 1.34135900  | -3.57989200 | -0.15627300 |
| H  | 0.63996800  | -4.03604400 | 1.84680900  |
| H  | 0.93779700  | -2.32597200 | 1.53921800  |
| C  | 2.84818000  | -3.64862900 | 0.11018700  |
| H  | 0.98498500  | -4.53218100 | -0.57006000 |
| H  | 1.14144800  | -2.81457300 | -0.91565400 |
| C  | 3.65896700  | -3.93101600 | -1.15790400 |
| H  | 3.17374200  | -2.69335400 | 0.54116400  |
| H  | 3.05397900  | -4.42151700 | 0.86384400  |
| H  | 4.73399200  | -3.96281700 | -0.95122300 |
| H  | 3.37440700  | -4.88920600 | -1.60765800 |
| H  | 3.48556000  | -3.15149200 | -1.90926000 |
| C  | -0.36676100 | 2.23675900  | 3.24404000  |
| H  | -0.36912900 | 2.18895000  | 4.34088400  |
| H  | -1.08366300 | 3.00537100  | 2.94631400  |
| H  | 0.62587500  | 2.56006900  | 2.92658100  |
| S  | 1.76224200  | -0.04626900 | -0.03766600 |
| C  | 2.50969900  | 1.16644600  | -1.20907800 |
| H  | 2.13563200  | 0.85924400  | -2.19037400 |
| H  | 2.10339600  | 2.15953600  | -0.99324000 |
| C  | 4.01564500  | 1.16378900  | -1.16249500 |
| C  | 4.71425700  | 2.22196000  | -0.56951200 |
| C  | 4.74053000  | 0.07773900  | -1.67532900 |
| C  | 6.10941200  | 2.20134900  | -0.49443000 |
| H  | 4.16239200  | 3.06857700  | -0.16802600 |
| C  | 6.13119100  | 0.05520100  | -1.60262600 |
| H  | 4.20426400  | -0.75613900 | -2.12038600 |
| C  | 6.82102000  | 1.11846400  | -1.01092700 |

|   |            |             |             |
|---|------------|-------------|-------------|
| H | 6.63735600 | 3.03120400  | -0.03320100 |
| H | 6.67861300 | -0.79166300 | -2.00650800 |
| H | 7.90547400 | 1.10053300  | -0.95388800 |

**<sup>3</sup>IM3**

|    |             |             |             |
|----|-------------|-------------|-------------|
| Ni | 0.48067700  | -0.04393500 | 0.15229700  |
| C  | 2.26635700  | -3.65902600 | -1.41954900 |
| C  | 3.23579000  | 0.23851500  | -0.35756800 |
| C  | 4.58963400  | 0.67487200  | -0.29843300 |
| C  | 4.82634400  | 2.00793100  | 0.06295100  |
| C  | 3.74573900  | 2.83753500  | 0.34386600  |
| C  | 2.43472100  | 2.34329100  | 0.27468500  |
| N  | 2.17652500  | 1.06484200  | -0.06049200 |
| H  | 5.84538500  | 2.38055100  | 0.12081900  |
| H  | 3.90038700  | 3.87628200  | 0.61751300  |
| C  | 2.92761800  | -1.09985200 | -0.71122500 |
| C  | 3.97456000  | -2.01192200 | -1.01625900 |
| C  | 3.62096200  | -3.32110700 | -1.37091200 |
| C  | 1.28107400  | -2.72566100 | -1.09891800 |
| N  | 1.58927300  | -1.45355000 | -0.72296800 |
| H  | 4.38958800  | -4.04813500 | -1.61503500 |
| H  | 1.96168000  | -4.65772400 | -1.71648200 |
| C  | -0.17647900 | -3.10489500 | -1.15175400 |
| C  | -0.81062100 | -3.31711900 | 0.23597100  |
| H  | -0.28563700 | -4.02247700 | -1.74108700 |
| H  | -0.72500900 | -2.31815300 | -1.68529800 |
| C  | -2.23872400 | -3.86999800 | 0.16974400  |
| H  | -0.18062300 | -4.00204000 | 0.81787900  |
| H  | -0.79982700 | -2.36737900 | 0.78217000  |
| C  | -2.89013800 | -3.98592800 | 1.55148400  |
| H  | -2.85742700 | -3.22984800 | -0.47373900 |
| H  | -2.22354000 | -4.85418300 | -0.31767400 |
| H  | -3.90776200 | -4.38479600 | 1.48541000  |
| H  | -2.31100800 | -4.64814100 | 2.20464500  |
| H  | -2.94139800 | -3.00917600 | 2.04624600  |
| C  | -2.19389800 | 1.32085400  | 1.23522800  |
| H  | -3.28492600 | 1.39307800  | 1.21442900  |
| H  | -1.79772900 | 2.28914200  | 1.55778600  |
| C  | -1.67733000 | 0.19946000  | 2.13900300  |
| H  | -2.04889700 | 0.41482000  | 3.15771300  |
| H  | -2.16313200 | -0.74419300 | 1.84987400  |
| C  | 0.34948500  | -1.04930900 | 3.02639400  |
| H  | -0.10989000 | -2.01183200 | 2.76016200  |
| H  | 0.02860000  | -0.85288500 | 4.06639600  |
| C  | 5.62999200  | -0.26442400 | -0.60590200 |
| H  | 6.66206000  | 0.07257200  | -0.55784500 |
| C  | 5.33393300  | -1.54918600 | -0.94962000 |
| H  | 6.12731100  | -2.25485300 | -1.18152700 |
| C  | -2.64123500 | -0.25744200 | -1.09111700 |
| H  | -2.32174400 | -1.14461900 | -0.54710900 |
| H  | -2.35089800 | -0.38145000 | -2.13829100 |
| C  | -0.28443000 | 5.99309200  | 0.23623600  |
| H  | -1.18447900 | 6.61564600  | 0.27114000  |
| H  | -0.02847700 | 5.73171500  | 1.26847500  |



|   |             |             |             |
|---|-------------|-------------|-------------|
| H | 0.53155300  | 6.60843500  | -0.16126800 |
| C | 1.26175000  | 3.25637300  | 0.51014100  |
| H | 1.55576900  | 4.04926000  | 1.20528500  |
| H | 0.46177900  | 2.68353900  | 0.98666800  |
| C | 0.74305900  | 3.87232600  | -0.80595400 |
| H | 0.52050100  | 3.05546100  | -1.50143100 |
| H | 1.54735300  | 4.46552400  | -1.26216900 |
| C | -0.50638300 | 4.74759400  | -0.62986200 |
| H | -1.31450200 | 4.13932900  | -0.20375500 |
| H | -0.85597200 | 5.05647200  | -1.62307900 |
| C | -0.15285500 | 0.05155400  | 2.08717500  |
| H | 0.27778100  | 1.00168600  | 2.45221400  |
| C | 1.87363600  | -1.20787500 | 3.00019700  |
| H | 2.22177100  | -1.94636800 | 3.73170500  |
| H | 2.20965600  | -1.52203200 | 2.00683900  |
| H | 2.36673000  | -0.25396900 | 3.22367900  |
| S | -1.60885000 | 1.16817000  | -0.51212600 |
| C | -4.12166100 | -0.03924100 | -0.94148400 |
| C | -4.80313700 | 0.86485600  | -1.76842400 |
| C | -4.83799700 | -0.72716800 | 0.04628100  |
| C | -6.17283000 | 1.07000300  | -1.61560900 |
| H | -4.25017500 | 1.41172900  | -2.52776900 |
| C | -6.21104200 | -0.52210200 | 0.20121500  |
| H | -4.31807200 | -1.42751500 | 0.69419900  |
| C | -6.88129700 | 0.37628300  | -0.62931400 |
| H | -6.68985300 | 1.77018100  | -2.26554700 |
| H | -6.75349700 | -1.06383800 | 0.97072700  |
| H | -7.94893500 | 0.53688300  | -0.51093800 |

**<sup>2</sup>PR2**

|   |             |             |             |
|---|-------------|-------------|-------------|
| C | 2.23877600  | 3.58973400  | -0.74020800 |
| C | 3.78717100  | -0.26039800 | -0.49928100 |
| C | 5.16783700  | -0.51585000 | -0.70587700 |
| C | 5.59475400  | -1.85286700 | -0.61785200 |
| C | 4.66508500  | -2.84711900 | -0.33512500 |
| N | 2.88625200  | -1.24727300 | -0.20632600 |
| H | 6.64198900  | -2.09743900 | -0.77109800 |
| H | 4.97208700  | -3.88512800 | -0.25929700 |
| C | 3.27754700  | 1.06634500  | -0.59788600 |
| C | 4.16194100  | 2.14384100  | -0.85513900 |
| C | 3.60645600  | 3.43643000  | -0.90517800 |
| C | 1.40859100  | 2.47094000  | -0.54084700 |
| N | 1.91890300  | 1.22861900  | -0.45052000 |
| H | 4.24856600  | 4.29580600  | -1.07653300 |
| H | 1.78310500  | 4.57364300  | -0.77835100 |
| C | -0.08583800 | 2.64115700  | -0.47675800 |
| C | -0.68794100 | 3.11717700  | -1.81254100 |
| H | -0.33692200 | 3.35858500  | 0.31378100  |
| H | -0.53920600 | 1.68682600  | -0.20055300 |
| C | -2.21806300 | 3.15355000  | -1.76063600 |
| H | -0.29535300 | 4.10987300  | -2.07043800 |
| H | -0.36011700 | 2.44150100  | -2.61215200 |
| C | -2.85793300 | 3.48412600  | -3.11057000 |

|   |             |             |             |
|---|-------------|-------------|-------------|
| H | -2.58659300 | 2.18176300  | -1.41657700 |
| H | -2.53755500 | 3.88350900  | -1.00393500 |
| H | -3.95078700 | 3.49888900  | -3.03929800 |
| H | -2.53350300 | 4.46310800  | -3.48214400 |
| H | -2.58424100 | 2.73604700  | -3.86360300 |
| C | 6.03923300  | 0.59082500  | -0.98200300 |
| H | 7.09617900  | 0.39152500  | -1.13612300 |
| C | 5.55824300  | 1.86588400  | -1.04363700 |
| H | 6.22660700  | 2.69852400  | -1.24516200 |
| C | 0.22920800  | -4.26569800 | 3.49948600  |
| H | -0.62603800 | -4.91351100 | 3.71401900  |
| H | 1.03524000  | -4.52454800 | 4.19604000  |
| H | -0.07591400 | -3.23569600 | 3.71602700  |
| C | 2.28107600  | -3.55566700 | 0.22873900  |
| H | 2.66120500  | -4.55884100 | 0.00729100  |
| H | 1.39836200  | -3.39274600 | -0.40193700 |
| C | 1.85343900  | -3.46906600 | 1.70811600  |
| H | 1.56377800  | -2.43454600 | 1.92787800  |
| H | 2.71583400  | -3.69579700 | 2.34977900  |
| C | 0.68568300  | -4.40172800 | 2.04422200  |
| H | 0.97568300  | -5.44178200 | 1.84114000  |
| H | -0.15399900 | -4.17358800 | 1.37754000  |
| C | -0.15357700 | -1.32051200 | -1.67320300 |
| H | -0.50910800 | -2.27063300 | -1.23428600 |
| C | -1.39236200 | -0.47252700 | -1.97548100 |
| C | -2.38617400 | -1.06677900 | -2.99111000 |
| H | -1.08437000 | 0.50073700  | -2.37421000 |
| H | -1.93630100 | -0.26436500 | -1.04639900 |
| H | -3.14974100 | -0.33120700 | -3.26612300 |
| H | -1.87328000 | -1.35570300 | -3.91267700 |
| C | 1.28462700  | -0.42678400 | -3.62294400 |
| H | 1.86842600  | 0.18290200  | -2.92569800 |
| H | 1.93440600  | -0.71773800 | -4.45602500 |
| C | 0.70344800  | -1.65268400 | -2.90520100 |
| H | 0.14375000  | -2.25278800 | -3.64384000 |
| H | 1.53765000  | -2.29241000 | -2.58727800 |
| C | 3.31485400  | -2.52187900 | -0.13092300 |
| H | 0.49369200  | 0.21196300  | -4.03244200 |
| S | -3.26973800 | -2.57100700 | -2.38733900 |
| C | -4.93139500 | -1.84657100 | -2.01977900 |
| H | -5.38674300 | -1.52238000 | -2.96078300 |
| H | -5.51261700 | -2.69512400 | -1.64575400 |
| C | -4.92582300 | -0.71995500 | -1.01827000 |
| C | -4.70983500 | -0.97479700 | 0.34403100  |
| C | -5.13201500 | 0.60267900  | -1.42887500 |
| C | -4.70963600 | 0.06623900  | 1.27104400  |
| H | -4.53201200 | -1.99226000 | 0.67877700  |
| C | -5.12005700 | 1.65043500  | -0.50334200 |
| H | -5.30754600 | 0.81569300  | -2.48056800 |
| C | -4.90663600 | 1.38565200  | 0.84895600  |
| H | -4.55682700 | -0.15752200 | 2.32152100  |
| H | -5.27667200 | 2.67041100  | -0.84282900 |
| H | -4.90185800 | 2.19741400  | 1.57111100  |
| C | -0.83637600 | 0.28586300  | 2.32179300  |

|    |             |             |             |
|----|-------------|-------------|-------------|
| C  | -2.07624500 | -1.54065700 | 2.37122200  |
| O  | -2.91627700 | -2.33799900 | 2.66149200  |
| O  | -1.96494600 | -0.26564500 | 2.87319500  |
| O  | -1.04886900 | -1.72065700 | 1.50477400  |
| N  | -0.26417700 | -0.52105800 | 1.45458700  |
| C  | -0.39776600 | 1.58632200  | 2.75302400  |
| C  | -1.30676100 | 2.46849500  | 3.37603900  |
| C  | 0.93929600  | 1.98852600  | 2.55323000  |
| C  | -0.88488900 | 3.73679100  | 3.75759800  |
| H  | -2.33220900 | 2.15399500  | 3.53756700  |
| C  | 1.34671700  | 3.25765800  | 2.94515300  |
| H  | 1.63513200  | 1.30249600  | 2.08465100  |
| C  | 0.43812200  | 4.14127900  | 3.53979800  |
| H  | -1.59036800 | 4.41685100  | 4.22574700  |
| H  | 2.37624400  | 3.56058400  | 2.78031200  |
| H  | 0.75843500  | 5.13575500  | 3.83499900  |
| Ni | 0.97344800  | -0.56659300 | -0.18833100 |

<sup>2</sup>Ni

|    |             |             |             |
|----|-------------|-------------|-------------|
| C  | 3.73414100  | 0.16890800  | -0.28493000 |
| C  | 5.11924500  | 0.41694600  | -0.14632200 |
| C  | 5.49326700  | 1.72682900  | 0.22999200  |
| H  | 6.54514300  | 1.97231100  | 0.34948600  |
| C  | 4.51789400  | 2.67524300  | 0.44245400  |
| H  | 4.78161900  | 3.68637000  | 0.73334700  |
| C  | 3.14473800  | 2.34983400  | 0.29262800  |
| C  | 3.28432400  | -1.14272700 | -0.66663900 |
| C  | 4.22913700  | -2.16268400 | -0.92081300 |
| C  | 3.71763900  | -3.41480300 | -1.33178200 |
| C  | 1.47182300  | -2.50422400 | -1.21564700 |
| C  | 2.35936300  | -3.57457000 | -1.49062800 |
| H  | 4.40189400  | -4.23396100 | -1.53579100 |
| H  | 1.94789600  | -4.51849200 | -1.82944500 |
| N  | 1.93913400  | -1.32951500 | -0.78016700 |
| N  | 2.78210300  | 1.11458800  | -0.07250600 |
| C  | -1.23648500 | 2.22350100  | 0.33695300  |
| O  | -0.93144700 | 2.71174500  | 1.45526200  |
| C  | 0.45413100  | -0.15128200 | 1.79275700  |
| H  | -0.09725800 | 0.71004200  | 2.17294000  |
| Ni | 0.84129300  | 0.30350400  | -0.12557900 |
| N  | -0.60657500 | 1.23671300  | -0.29796300 |
| C  | 2.07814100  | 3.37869600  | 0.51892800  |
| C  | 1.49200100  | 3.92635000  | -0.80270100 |
| H  | 2.50129200  | 4.20595800  | 1.10072700  |
| H  | 1.25309100  | 2.94397200  | 1.09780400  |
| C  | 0.49549800  | 5.06584500  | -0.55028400 |
| H  | 2.30256300  | 4.27561800  | -1.45865800 |
| H  | 0.98535600  | 3.10180400  | -1.31545800 |
| C  | -0.25619300 | 5.48030800  | -1.81834800 |
| H  | -0.21885400 | 4.74261700  | 0.21315100  |
| H  | 1.03433400  | 5.92949900  | -0.13476500 |
| H  | -0.94592100 | 6.30647400  | -1.61720300 |
| H  | 0.43458200  | 5.80244300  | -2.60752400 |

|   |             |             |             |
|---|-------------|-------------|-------------|
| H | -0.84988600 | 4.64550800  | -2.20475800 |
| C | -0.00998700 | -2.65974800 | -1.43321400 |
| C | -0.66031600 | -3.83104800 | -0.64902700 |
| H | -0.17434400 | -2.81266100 | -2.50871900 |
| H | -0.50032400 | -1.71578900 | -1.19062300 |
| C | -1.00855700 | -5.04881000 | -1.51218100 |
| H | -0.00319900 | -4.13909700 | 0.17388600  |
| H | -1.57961000 | -3.46497900 | -0.18461900 |
| C | -1.67596000 | -6.16230200 | -0.70153600 |
| H | -1.68307900 | -4.72276500 | -2.31414200 |
| H | -0.10812200 | -5.43915800 | -2.00723100 |
| H | -1.93673100 | -7.01941600 | -1.33090800 |
| H | -1.01610400 | -6.52103600 | 0.09704500  |
| H | -2.59469900 | -5.79451500 | -0.23228500 |
| C | -2.41226100 | 2.82229800  | -0.41473500 |
| C | -2.73488000 | 2.44398500  | -1.72585900 |
| C | -3.18437200 | 3.80100500  | 0.22249000  |
| C | -3.81189600 | 3.03410700  | -2.38740800 |
| H | -2.12416300 | 1.69239400  | -2.21512700 |
| C | -4.26267200 | 4.39010500  | -0.43735600 |
| H | -2.91200600 | 4.08091900  | 1.23451200  |
| C | -4.57938700 | 4.00903000  | -1.74410900 |
| H | -4.05213800 | 2.73621600  | -3.40478400 |
| H | -4.85727000 | 5.14786700  | 0.06634100  |
| H | -5.41827700 | 4.46984700  | -2.25896900 |
| C | 6.05367600  | -0.64282700 | -0.38877700 |
| C | 5.62656700  | -1.88360900 | -0.76334400 |
| H | 7.11361700  | -0.43522700 | -0.27281100 |
| H | 6.33933700  | -2.68080700 | -0.95343900 |
| C | -0.41206400 | -1.41158600 | 1.77627000  |
| C | -1.41092100 | -1.53714200 | 2.94505500  |
| H | 0.23369700  | -2.30229000 | 1.76994800  |
| H | -1.00779500 | -1.45277100 | 0.86399600  |
| H | -1.87023700 | -2.53248600 | 2.94374500  |
| H | -0.91756100 | -1.40800100 | 3.90997800  |
| C | 1.79921800  | -0.29045300 | 2.50257400  |
| H | 2.33793400  | 0.65913100  | 2.42841100  |
| S | -2.77508700 | -0.29722200 | 2.90771500  |
| C | -4.11627300 | -1.27873700 | 2.12171800  |
| H | -4.35557400 | -2.13408000 | 2.76308500  |
| H | -4.97823500 | -0.60209500 | 2.16330100  |
| C | -3.90952000 | -1.74331400 | 0.69284000  |
| C | -3.35439400 | -0.90299200 | -0.28246200 |
| C | -4.34811100 | -3.01888600 | 0.31068200  |
| C | -3.25965700 | -1.32441300 | -1.60840400 |
| H | -2.96957700 | 0.07013600  | -0.00177100 |
| C | -4.25902000 | -3.44006800 | -1.01915400 |
| H | -4.77487000 | -3.68431500 | 1.05785100  |
| C | -3.71601100 | -2.59082400 | -1.98514700 |
| H | -2.82571400 | -0.65409100 | -2.34416400 |
| H | -4.61008100 | -4.43012000 | -1.29686500 |
| H | -3.64589100 | -2.91422000 | -3.02007300 |
| H | 2.42023400  | -1.04393800 | 1.99840000  |
| C | 1.69391400  | -0.66702700 | 3.99279700  |

|   |            |             |            |
|---|------------|-------------|------------|
| H | 1.05238100 | 0.03922000  | 4.53051200 |
| H | 1.27926000 | -1.67113300 | 4.12716900 |
| H | 2.68274000 | -0.65339900 | 4.46564900 |

**<sup>2</sup>TSS**

|   |             |             |             |
|---|-------------|-------------|-------------|
| C | -3.66737200 | 0.83344900  | -0.18856100 |
| C | -5.06811900 | 0.96506000  | -0.04752400 |
| C | -5.77312100 | -0.18575400 | 0.36940400  |
| H | -6.85105600 | -0.13968000 | 0.49913800  |
| C | -5.08331200 | -1.35782500 | 0.59417200  |
| H | -5.60616100 | -2.25719800 | 0.90155600  |
| C | -3.67665000 | -1.41455400 | 0.42996800  |
| C | -2.88881700 | 1.95171600  | -0.64214000 |
| C | -3.52947200 | 3.17125800  | -0.95742200 |
| C | -2.71113100 | 4.20763400  | -1.45950200 |
| C | -0.78775200 | 2.73456400  | -1.28440000 |
| C | -1.36297500 | 3.98073000  | -1.63372400 |
| H | -3.15337400 | 5.16511500  | -1.72088300 |
| H | -0.72208700 | 4.75222300  | -2.04426400 |
| N | -1.54561500 | 1.75138600  | -0.77912600 |
| N | -2.99532500 | -0.32220800 | 0.05942800  |
| C | -2.92458900 | -2.69934400 | 0.61833700  |
| C | -2.49147500 | -3.32534400 | -0.72777600 |
| H | -3.55885400 | -3.40811700 | 1.16291200  |
| H | -2.01845500 | -2.53458700 | 1.21451900  |
| C | -1.87362600 | -4.71676600 | -0.53983900 |
| H | -3.35372700 | -3.38745000 | -1.40717500 |
| H | -1.76096300 | -2.65542900 | -1.19608600 |
| C | -1.30029700 | -5.28493600 | -1.84114300 |
| H | -1.08475500 | -4.64854800 | 0.21565100  |
| H | -2.63969400 | -5.39702700 | -0.14052700 |
| H | -0.87560600 | -6.28167300 | -1.68387000 |
| H | -2.07159600 | -5.36634100 | -2.61722600 |
| H | -0.49901900 | -4.64458000 | -2.22330900 |
| C | 0.68558500  | 2.48255000  | -1.47249200 |
| C | 1.60387700  | 3.40335100  | -0.62415600 |
| H | 0.92880400  | 2.61603300  | -2.53504800 |
| H | 0.88844100  | 1.43459300  | -1.24354500 |
| C | 2.19289300  | 4.59693200  | -1.38383400 |
| H | 1.05793700  | 3.75981400  | 0.25790400  |
| H | 2.43304800  | 2.80030200  | -0.24668800 |
| C | 3.11367200  | 5.44332700  | -0.50053100 |
| H | 2.75742000  | 4.21568000  | -2.24447400 |
| H | 1.39373100  | 5.22986200  | -1.79282800 |
| H | 3.54869100  | 6.28073100  | -1.05580200 |
| H | 2.56866400  | 5.85600900  | 0.35641000  |
| H | 3.93416100  | 4.83255600  | -0.10924600 |
| C | -5.68705600 | 2.22513400  | -0.33972800 |
| C | -4.94808600 | 3.28543800  | -0.77851200 |
| H | -6.76241100 | 2.31540700  | -0.21495000 |
| H | -5.42471000 | 4.23349900  | -1.01072200 |
| C | 0.58271300  | -2.42281900 | 0.48824800  |
| O | 0.14835600  | -2.98492400 | 1.52154800  |
| C | -0.05958400 | -0.06172100 | 1.90964200  |

|    |             |             |             |
|----|-------------|-------------|-------------|
| H  | 0.41844200  | -0.94295000 | 2.32567400  |
| Ni | -0.95852400 | -0.06282900 | -0.05933000 |
| N  | 0.41258200  | -1.15351600 | 0.10819500  |
| C  | -1.36931300 | 0.16851400  | 2.67479200  |
| C  | -1.13956700 | 0.39050600  | 4.18299400  |
| H  | -2.00722500 | -0.70998200 | 2.55416200  |
| H  | -1.92378300 | 1.02584800  | 2.27166700  |
| H  | -2.09661700 | 0.41322700  | 4.71650500  |
| H  | -0.53346800 | -0.41589600 | 4.60948600  |
| H  | -0.63159600 | 1.33978500  | 4.38014000  |
| C  | 0.89823300  | 1.12039800  | 1.82674000  |
| C  | 1.96286300  | 1.17100000  | 2.94082800  |
| H  | 0.33059500  | 2.06202100  | 1.84247300  |
| H  | 1.43248900  | 1.08437200  | 0.87864300  |
| H  | 2.56084000  | 2.08478400  | 2.84810400  |
| H  | 1.50325300  | 1.18317100  | 3.93111300  |
| S  | 3.12587400  | -0.26000100 | 2.95242500  |
| C  | 4.56501900  | 0.43203300  | 2.04437600  |
| H  | 5.31448100  | -0.36479400 | 2.12309600  |
| H  | 4.95713000  | 1.28701400  | 2.60590400  |
| C  | 4.38159900  | 0.81099100  | 0.58716700  |
| C  | 3.62321700  | 0.03158400  | -0.29744100 |
| C  | 5.05298400  | 1.93635200  | 0.08743700  |
| C  | 3.55310100  | 0.36729000  | -1.64986000 |
| H  | 3.06105100  | -0.81894300 | 0.07208800  |
| C  | 4.98637600  | 2.27011300  | -1.26755700 |
| H  | 5.64164900  | 2.55226400  | 0.76376500  |
| C  | 4.23498200  | 1.48321500  | -2.14232000 |
| H  | 2.96351400  | -0.25443100 | -2.31562100 |
| H  | 5.51516900  | 3.14539200  | -1.63462700 |
| H  | 4.17918100  | 1.73858300  | -3.19693500 |
| C  | 1.42037800  | -3.23917900 | -0.48225300 |
| C  | 1.67639700  | -2.81572600 | -1.79405000 |
| C  | 1.91378900  | -4.47843500 | -0.05701700 |
| C  | 2.42003800  | -3.61507800 | -2.66276700 |
| H  | 1.26872200  | -1.86477000 | -2.11960200 |
| C  | 2.66134900  | -5.27591400 | -0.92341700 |
| H  | 1.68824100  | -4.79524900 | 0.95560900  |
| C  | 2.91686400  | -4.84716200 | -2.22861600 |
| H  | 2.60710300  | -3.28087800 | -3.68004900 |
| H  | 3.04267100  | -6.23485600 | -0.58245600 |
| H  | 3.49438700  | -5.47139200 | -2.90515900 |

**<sup>2</sup>IM4**

|   |             |             |             |
|---|-------------|-------------|-------------|
| C | -3.79819100 | -0.82780100 | -0.16853100 |
| C | -5.17455800 | -0.99172400 | -0.44190000 |
| C | -5.79843500 | 0.03602800  | -1.18430600 |
| H | -6.85472900 | -0.03954600 | -1.42755600 |
| C | -5.05737600 | 1.13011500  | -1.58515900 |
| H | -5.51869400 | 1.93582000  | -2.14659200 |
| C | -3.68151600 | 1.22138200  | -1.26897700 |
| C | -3.09506900 | -1.81927800 | 0.59627100  |
| C | -3.78238100 | -2.95536500 | 1.07886300  |

|    |             |             |             |
|----|-------------|-------------|-------------|
| C  | -3.03005700 | -3.87357500 | 1.84469500  |
| C  | -1.07617400 | -2.45927100 | 1.56851500  |
| C  | -1.69486800 | -3.61971600 | 2.08873800  |
| H  | -3.50777900 | -4.76645400 | 2.23849900  |
| H  | -1.09801200 | -4.30677300 | 2.67880400  |
| N  | -1.77332300 | -1.58818100 | 0.82543800  |
| N  | -3.07388700 | 0.24500600  | -0.58307100 |
| C  | 1.17770500  | 1.92255400  | -0.38002400 |
| O  | 2.18346500  | 2.40711500  | -0.94605800 |
| C  | 0.91892900  | 0.48771000  | -2.23153100 |
| H  | 1.18341800  | 1.37511100  | -2.82368900 |
| Ni | -1.10348000 | 0.03614800  | -0.15980000 |
| N  | 0.40001400  | 0.95708400  | -0.92518400 |
| C  | -2.85353600 | 2.42535400  | -1.62244000 |
| C  | -2.62732800 | 3.33621300  | -0.39721500 |
| H  | -3.33349200 | 2.98918200  | -2.42991100 |
| H  | -1.87358600 | 2.08570200  | -1.97395900 |
| C  | -1.64126700 | 4.47202900  | -0.68230400 |
| H  | -3.58994400 | 3.74477600  | -0.05922300 |
| H  | -2.23552100 | 2.72245000  | 0.42202400  |
| C  | -1.43391400 | 5.37697000  | 0.53545000  |
| H  | -0.68096900 | 4.03698000  | -0.98425800 |
| H  | -1.99936800 | 5.06581900  | -1.53499600 |
| H  | -0.70522300 | 6.16600000  | 0.32421000  |
| H  | -2.37305200 | 5.85793600  | 0.83465800  |
| H  | -1.06040200 | 4.80137700  | 1.38758700  |
| C  | 0.38493700  | -2.16689600 | 1.77228500  |
| C  | 1.22343300  | -2.50759800 | 0.52241500  |
| H  | 0.76275600  | -2.71979100 | 2.63923300  |
| H  | 0.50101000  | -1.10010900 | 1.98909500  |
| C  | 1.43968600  | -4.00446900 | 0.29326700  |
| H  | 0.73445800  | -2.06137100 | -0.35007100 |
| H  | 2.19217100  | -2.01313300 | 0.61741100  |
| C  | 2.23941100  | -4.27123500 | -0.98627400 |
| H  | 1.97241400  | -4.42483100 | 1.15804000  |
| H  | 0.47239800  | -4.52446500 | 0.24359500  |
| H  | 2.44186500  | -5.33881300 | -1.12218600 |
| H  | 1.69270100  | -3.91839600 | -1.86817200 |
| H  | 3.19693800  | -3.73986500 | -0.96543900 |
| C  | 0.86050600  | 2.45467900  | 1.00994700  |
| C  | -0.05796200 | 1.89256100  | 1.90624000  |
| C  | 1.59624000  | 3.57045800  | 1.43913400  |
| C  | -0.24609800 | 2.42500900  | 3.18255400  |
| H  | -0.64203600 | 1.01980300  | 1.61120300  |
| C  | 1.41569900  | 4.10718900  | 2.71296200  |
| H  | 2.31410100  | 3.99497000  | 0.74664200  |
| C  | 0.49263000  | 3.53672600  | 3.59321000  |
| H  | -0.96543800 | 1.96596200  | 3.85571800  |
| H  | 1.99611100  | 4.97293500  | 3.01978300  |
| H  | 0.35170600  | 3.95193200  | 4.58729300  |
| C  | -5.84543000 | -2.16366500 | 0.04563100  |
| C  | -5.17795300 | -3.10464400 | 0.77576300  |
| H  | -6.90204800 | -2.28523000 | -0.17532600 |
| H  | -5.69615400 | -3.98508900 | 1.14496300  |

|   |             |             |             |
|---|-------------|-------------|-------------|
| C | 2.20879800  | -0.36200200 | -2.03138200 |
| C | 3.41909400  | 0.14877500  | -2.81084900 |
| H | 2.02768900  | -1.41117900 | -2.29286800 |
| H | 2.45288300  | -0.35078200 | -0.97127700 |
| H | 3.29199000  | 0.01357700  | -3.89045500 |
| C | -0.15533500 | -0.28435100 | -3.01233600 |
| H | -1.07699100 | 0.30917400  | -3.03760900 |
| H | -0.40317300 | -1.21216200 | -2.47675200 |
| C | 0.27248400  | -0.61658800 | -4.44609000 |
| H | 1.16367900  | -1.25250000 | -4.46499000 |
| H | -0.52133400 | -1.14588700 | -4.98350300 |
| H | 0.50644600  | 0.29609700  | -5.00615900 |
| H | 3.55318900  | 1.21589300  | -2.61530400 |
| S | 4.99041400  | -0.72025800 | -2.39893300 |
| C | 5.46030100  | 0.12990600  | -0.82434400 |
| H | 5.30692200  | 1.20243800  | -0.97216900 |
| H | 6.53891300  | -0.04219300 | -0.74731400 |
| C | 4.77389300  | -0.33157200 | 0.44126100  |
| C | 5.03295200  | -1.60103600 | 0.97845600  |
| C | 3.89544000  | 0.52181200  | 1.12145300  |
| C | 4.44177200  | -2.00107700 | 2.17709600  |
| H | 5.70217000  | -2.27531000 | 0.44979300  |
| C | 3.29361800  | 0.12035300  | 2.31736900  |
| H | 3.66023300  | 1.49176700  | 0.69561100  |
| C | 3.57282000  | -1.13815800 | 2.85376400  |
| H | 4.65866300  | -2.98520600 | 2.58401400  |
| H | 2.60652600  | 0.79540000  | 2.81925700  |
| H | 3.11265300  | -1.44915500 | 3.78779200  |

## <sup>2</sup>IM5

|    |             |             |             |
|----|-------------|-------------|-------------|
| C  | 2.69263000  | 2.33359000  | 0.53692800  |
| C  | 3.73685500  | 2.76951400  | 1.38626900  |
| C  | 3.37343100  | 3.61796000  | 2.45573400  |
| H  | 4.13674300  | 3.97978000  | 3.13930000  |
| C  | 2.05454300  | 3.99647900  | 2.60311700  |
| H  | 1.75735300  | 4.66787400  | 3.40196800  |
| C  | 1.06354100  | 3.50401300  | 1.72128600  |
| C  | 2.99675900  | 1.53098000  | -0.62033200 |
| C  | 4.34274100  | 1.20772900  | -0.90541600 |
| C  | 4.59143600  | 0.51825300  | -2.11184900 |
| C  | 2.21677700  | 0.61089800  | -2.60686700 |
| C  | 3.54219600  | 0.26152300  | -2.96427100 |
| H  | 5.60753700  | 0.23605900  | -2.37413000 |
| H  | 3.71116600  | -0.21562100 | -3.92326300 |
| N  | 1.95112700  | 1.17647300  | -1.42369200 |
| N  | 1.38903800  | 2.66639700  | 0.72908900  |
| C  | -2.62081900 | 1.09685900  | 0.57161300  |
| O  | -3.58125100 | 0.85790800  | 1.34331600  |
| C  | -1.17519800 | 0.16113700  | 2.16745200  |
| H  | -1.79425600 | 0.69726500  | 2.90198400  |
| Ni | 0.26700100  | 1.24941100  | -0.25307600 |
| N  | -1.32681600 | 0.84706200  | 0.86058400  |
| C  | -0.38641000 | 3.87676800  | 1.86969100  |



|   |             |             |             |
|---|-------------|-------------|-------------|
| C | -0.98329000 | 4.51890200  | 0.60505600  |
| H | -0.50484500 | 4.54710700  | 2.72826100  |
| H | -0.95093600 | 2.96059700  | 2.07580400  |
| C | -2.47165100 | 4.84344600  | 0.76217200  |
| H | -0.42456100 | 5.43151200  | 0.35394500  |
| H | -0.85235300 | 3.82434200  | -0.23241700 |
| C | -3.06788200 | 5.44533900  | -0.51310700 |
| H | -3.01138400 | 3.92495500  | 1.02211500  |
| H | -2.61014600 | 5.53637100  | 1.60417300  |
| H | -4.13568600 | 5.65564900  | -0.39436100 |
| H | -2.56701300 | 6.38454700  | -0.77749000 |
| H | -2.95953000 | 4.75345400  | -1.35396400 |
| C | 1.10093800  | 0.41128600  | -3.60554300 |
| C | 0.43356200  | -0.98198100 | -3.63535200 |
| H | 1.52030200  | 0.62350200  | -4.59731900 |
| H | 0.33640700  | 1.16915500  | -3.41354300 |
| C | 1.41082200  | -2.16095800 | -3.70977100 |
| H | -0.18450900 | -1.09034300 | -2.74561300 |
| H | -0.24125500 | -1.00625200 | -4.50123400 |
| C | 0.69416800  | -3.51383300 | -3.65792600 |
| H | 2.01256400  | -2.09196300 | -4.62762700 |
| H | 2.11134500  | -2.10076300 | -2.86971100 |
| H | 1.40226200  | -4.34685200 | -3.72708500 |
| H | 0.14120100  | -3.61766500 | -2.71883400 |
| H | -0.02570700 | -3.62033400 | -4.47798800 |
| C | -2.97246000 | 1.67543700  | -0.78822200 |
| C | -2.10295600 | 1.72291500  | -1.88441200 |
| C | -4.28907100 | 2.12230700  | -0.97486500 |
| C | -2.51829700 | 2.21605600  | -3.12162900 |
| H | -1.08527500 | 1.34656400  | -1.78237600 |
| C | -4.71427100 | 2.61431900  | -2.20819300 |
| H | -4.96397200 | 2.06149800  | -0.12847000 |
| C | -3.83015600 | 2.66518800  | -3.28943100 |
| H | -1.82211300 | 2.23700700  | -3.95628500 |
| H | -5.73780300 | 2.95904000  | -2.32724000 |
| H | -4.16033900 | 3.04559600  | -4.25208500 |
| C | 5.08367300  | 2.36163400  | 1.10905600  |
| C | 5.37448200  | 1.61338600  | 0.00545300  |
| H | 5.87223500  | 2.67985600  | 1.78522000  |
| H | 6.39929500  | 1.32699400  | -0.21399900 |
| C | -1.70893900 | -1.30023100 | 2.09071500  |
| C | -2.75579500 | -1.61284500 | 3.16082000  |
| H | -0.89433200 | -2.02967300 | 2.14158800  |
| H | -2.18829200 | -1.42607900 | 1.12152500  |
| H | -2.31465800 | -1.60837300 | 4.16343100  |
| C | 0.27443400  | 0.20637400  | 2.67071900  |
| H | 0.59669100  | 1.24662500  | 2.74533800  |
| H | 0.92942400  | -0.25908200 | 1.92559500  |
| C | 0.47994000  | -0.47216600 | 4.02911300  |
| H | 0.26084100  | -1.54383800 | 3.98903400  |
| H | 1.51592800  | -0.35956600 | 4.36800600  |
| H | -0.16900500 | -0.02884800 | 4.79324000  |
| H | -3.53684000 | -0.84870800 | 3.12524300  |
| S | -3.54738600 | -3.26644500 | 3.00012600  |

|   |             |             |             |
|---|-------------|-------------|-------------|
| C | -4.64996400 | -2.97691600 | 1.54664000  |
| H | -5.24219500 | -2.07885600 | 1.74410800  |
| H | -5.33236700 | -3.83380400 | 1.56027900  |
| C | -3.96444900 | -2.86995800 | 0.20199500  |
| C | -3.16284300 | -3.91341700 | -0.28241100 |
| C | -4.10447800 | -1.70967900 | -0.57019500 |
| C | -2.51843600 | -3.80092600 | -1.51327800 |
| H | -3.02484700 | -4.80210600 | 0.32712100  |
| C | -3.45842100 | -1.59392400 | -1.80443700 |
| H | -4.66254500 | -0.86722600 | -0.17418400 |
| C | -2.66609400 | -2.64005100 | -2.28054000 |
| H | -1.90058800 | -4.61789100 | -1.87630600 |
| H | -3.56241100 | -0.67946200 | -2.37914200 |
| H | -2.16140200 | -2.55200500 | -3.23724000 |
| O | 1.01789500  | -2.98701400 | 0.84164300  |
| O | 2.47746900  | -1.71391300 | -0.40774100 |
| C | 3.30356600  | -2.50588200 | 0.48781900  |
| C | 2.31025100  | -3.64800500 | 0.93575000  |
| B | 1.16853600  | -1.96132000 | -0.05709000 |
| O | 0.15919500  | -1.21533100 | -0.57885400 |
| H | -0.72620400 | -1.42832300 | -0.25194600 |
| C | 4.52776500  | -2.97950000 | -0.28875100 |
| H | 5.13367200  | -2.11409900 | -0.57186300 |
| H | 5.14254400  | -3.64534000 | 0.32522500  |
| H | 4.24367200  | -3.50429700 | -1.20252800 |
| C | 3.72643500  | -1.59108800 | 1.64327400  |
| H | 4.40342800  | -2.10657900 | 2.33059900  |
| H | 4.24103100  | -0.71646800 | 1.23862800  |
| H | 2.85874300  | -1.24136000 | 2.20723900  |
| C | 2.49349300  | -4.14094600 | 2.36626700  |
| H | 1.75038700  | -4.91227400 | 2.58550500  |
| H | 3.48982700  | -4.57426300 | 2.50119500  |
| H | 2.35954300  | -3.33115800 | 3.08513300  |
| C | 2.26986900  | -4.82524300 | -0.04420600 |
| H | 3.18592200  | -5.42113800 | 0.00126900  |
| H | 1.42234900  | -5.46608700 | 0.21173500  |
| H | 2.12999000  | -4.47362500 | -1.07040800 |

**<sup>2</sup>[Ni]OBpin**

|   |             |             |             |
|---|-------------|-------------|-------------|
| C | -2.81158100 | -1.08073000 | 0.42363000  |
| C | -3.81392600 | -1.84709000 | 1.05744600  |
| C | -3.42392800 | -3.11352000 | 1.54690900  |
| H | -4.15364100 | -3.75029100 | 2.03964200  |
| C | -2.11197400 | -3.52246200 | 1.40149100  |
| H | -1.78886800 | -4.48662700 | 1.77998100  |
| C | -1.16152400 | -2.69047200 | 0.76423400  |
| C | -3.12015400 | 0.22378500  | -0.08561400 |
| C | -4.42382700 | 0.74906100  | 0.04994000  |
| C | -4.63625200 | 2.04919400  | -0.45958400 |
| C | -2.30753900 | 2.13263200  | -1.14740200 |
| C | -3.58516900 | 2.72921600  | -1.04616500 |
| H | -5.61939200 | 2.50544400  | -0.38314400 |
| H | -3.72487900 | 3.73206100  | -1.43566400 |

|    |             |             |             |
|----|-------------|-------------|-------------|
| N  | -2.09604100 | 0.89647700  | -0.67596500 |
| N  | -1.52540100 | -1.49735800 | 0.27371500  |
| Ni | -0.40726600 | -0.16832100 | -0.73594900 |
| C  | 0.27754600  | -3.09334800 | 0.59423500  |
| C  | 0.62260300  | -3.49645300 | -0.85538900 |
| H  | 0.50920000  | -3.92064800 | 1.27509800  |
| H  | 0.91552100  | -2.24421100 | 0.86795600  |
| C  | 2.12126300  | -3.76224700 | -1.03133000 |
| H  | 0.03662200  | -4.37979900 | -1.14631600 |
| H  | 0.33012000  | -2.67790600 | -1.52360900 |
| C  | 2.49319900  | -4.06483800 | -2.48531900 |
| H  | 2.66532600  | -2.87668800 | -0.68548800 |
| H  | 2.42463800  | -4.59844600 | -0.38478000 |
| H  | 3.56612100  | -4.25778400 | -2.59119000 |
| H  | 1.95684100  | -4.94391200 | -2.86295000 |
| H  | 2.24111000  | -3.21563600 | -3.13009400 |
| C  | -1.12195100 | 2.84922700  | -1.74109400 |
| C  | -0.11132400 | 3.32057700  | -0.67049000 |
| H  | -1.47093200 | 3.70678000  | -2.32749400 |
| H  | -0.60545000 | 2.16037200  | -2.41905000 |
| C  | -0.68353800 | 4.34231400  | 0.31641700  |
| H  | 0.26198600  | 2.44224400  | -0.13157000 |
| H  | 0.75982500  | 3.74133400  | -1.18567800 |
| C  | 0.34613000  | 4.78835500  | 1.35900000  |
| H  | -1.05558400 | 5.21698300  | -0.23629300 |
| H  | -1.55599400 | 3.91213400  | 0.82682700  |
| H  | -0.07454400 | 5.52343200  | 2.05326400  |
| H  | 0.70222900  | 3.93473700  | 1.94559700  |
| H  | 1.22050300  | 5.24223500  | 0.87866800  |
| C  | -5.13657700 | -1.29835300 | 1.17003700  |
| C  | -5.42881500 | -0.05391000 | 0.68879200  |
| H  | -5.90464300 | -1.89490500 | 1.65428100  |
| H  | -6.43197100 | 0.35183900  | 0.78495600  |
| O  | 2.75570500  | -0.64297600 | 0.40320300  |
| O  | 3.16127200  | 1.36291300  | -0.66262000 |
| C  | 3.98584500  | 1.34731700  | 0.51523300  |
| C  | 4.03773100  | -0.18551200 | 0.86912400  |
| B  | 2.32741100  | 0.23585700  | -0.61982400 |
| O  | 1.29296600  | 0.01581900  | -1.41652300 |
| C  | 5.33636600  | 1.97981200  | 0.18847100  |
| H  | 5.20061900  | 3.04123200  | -0.03970700 |
| H  | 6.02253500  | 1.89759800  | 1.03848300  |
| H  | 5.79501600  | 1.50681400  | -0.68159900 |
| C  | 3.25956500  | 2.17533600  | 1.58609200  |
| H  | 3.84719700  | 2.27223000  | 2.50435600  |
| H  | 3.06822600  | 3.17458400  | 1.18653000  |
| H  | 2.29548000  | 1.71994200  | 1.83238700  |
| C  | 4.16758900  | -0.50294300 | 2.35682600  |
| H  | 4.19061600  | -1.58749900 | 2.50110400  |
| H  | 5.09320500  | -0.08483600 | 2.76704000  |
| H  | 3.32193300  | -0.10649100 | 2.92181400  |
| C  | 5.11158100  | -0.93951000 | 0.07147300  |
| H  | 6.12300100  | -0.68679700 | 0.40466700  |
| H  | 4.96049700  | -2.01464600 | 0.20425400  |

H 5.02646300 -0.71369900 -0.99509200

**<sup>2</sup>TS6**

C -3.64276600 -0.79245100 -0.43196500  
C -4.79315700 -1.56229000 -0.71436000  
C -4.57792700 -2.90599400 -1.09521400  
H -5.42746300 -3.54282300 -1.32657500  
C -3.28852900 -3.39409000 -1.16666900  
H -3.10063500 -4.42265900 -1.45648200  
C -2.18610100 -2.56201400 -0.85858000  
C -3.77563500 0.58552200 -0.04682600  
C -5.05966200 1.16328000 0.05845500  
C -5.11388700 2.51971200 0.44768800  
C -2.68467100 2.55991900 0.55549900  
C -3.93871200 3.20050300 0.69394600  
H -6.07582500 3.01427900 0.55053100  
H -3.95972500 4.24228700 0.99561100  
N -2.62058400 1.26953900 0.19563400  
N -2.37793500 -1.28601500 -0.50236600  
C -0.76516600 -3.04686300 -0.94263000  
C -0.04867800 -2.55269700 -2.21896000  
H -0.74704300 -4.14232400 -0.90489600  
H -0.22839200 -2.67414500 -0.06471600  
C 1.42903700 -2.95760300 -2.26182900  
H -0.56941100 -2.94777900 -3.10258000  
H -0.12071400 -1.46168200 -2.26097100  
C 2.14083600 -2.45586800 -3.52231900  
H 1.94133700 -2.53948500 -1.38832900  
H 1.50975900 -4.05221500 -2.18783400  
H 3.17262000 -2.82197900 -3.55975000  
H 1.63113900 -2.79901900 -4.43110200  
H 2.17827200 -1.36288400 -3.52679400  
C -1.39850200 3.31666400 0.79023900  
C -0.39407900 2.66190000 1.76516000  
H -1.66033100 4.32004000 1.14276000  
H -0.88123900 3.43182100 -0.17198600  
C -0.98522900 2.10103100 3.06152500  
H 0.15421200 1.87297000 1.24240900  
H 0.36281900 3.41877600 2.00480000  
C 0.07660900 1.36572200 3.88797200  
H -1.44000200 2.91030600 3.64984400  
H -1.79172200 1.39771200 2.81938100  
H -0.33420800 0.99349700 4.83262700  
H 0.46315200 0.50803900 3.32651800  
H 0.91976100 2.02551000 4.12617500  
C -6.08564200 -0.94877500 -0.60180400  
C -6.21313800 0.35821200 -0.22890200  
H -6.96486000 -1.54826700 -0.82030400  
H -7.19544800 0.81451700 -0.14551800  
O 1.08592400 -1.47501500 1.72772700  
O 2.99514900 -0.96034200 0.54702900  
C 3.43548200 -1.57868900 1.77479000  
C 2.13058700 -2.30693700 2.27742800

|    |             |             |             |
|----|-------------|-------------|-------------|
| B  | 1.61534000  | -0.78066600 | 0.62867400  |
| C  | 4.60819200  | -2.50253200 | 1.45864400  |
| H  | 5.45911900  | -1.90942100 | 1.11154000  |
| H  | 4.91823000  | -3.05842600 | 2.34981900  |
| H  | 4.35137500  | -3.21229800 | 0.67056800  |
| C  | 3.88637400  | -0.45230100 | 2.71477800  |
| H  | 4.29717600  | -0.84399100 | 3.65006800  |
| H  | 4.65957800  | 0.13629800  | 2.21412300  |
| H  | 3.05425200  | 0.21684100  | 2.95115900  |
| C  | 1.96826200  | -2.36095400 | 3.79456200  |
| H  | 1.03039700  | -2.86552100 | 4.04489400  |
| H  | 2.79077100  | -2.92013700 | 4.25306500  |
| H  | 1.93701100  | -1.36125500 | 4.23071100  |
| C  | 1.96059500  | -3.71122800 | 1.68318200  |
| H  | 2.68071400  | -4.41893800 | 2.10457900  |
| H  | 0.95122200  | -4.06764600 | 1.90753700  |
| H  | 2.08062200  | -3.69604600 | 0.59744000  |
| O  | 0.87128100  | -0.05732800 | -0.20753000 |
| B  | 1.25673700  | 1.11744600  | -1.74901100 |
| O  | 1.34003600  | 2.40862200  | -1.20310300 |
| C  | 2.73669500  | 2.73368000  | -1.03708600 |
| O  | 2.49667500  | 0.68373000  | -2.21733800 |
| C  | 3.44879800  | 1.75228800  | -2.05850400 |
| H  | 0.24192000  | 0.80661600  | -2.30919900 |
| C  | 3.13055600  | 2.47817900  | 0.42366700  |
| H  | 2.48354200  | 3.07182700  | 1.07463800  |
| H  | 3.01257200  | 1.42881900  | 0.68272400  |
| H  | 4.16858900  | 2.76913800  | 0.61393400  |
| C  | 4.76289800  | 1.15186100  | -1.55765000 |
| H  | 5.49332500  | 1.93426800  | -1.32343800 |
| H  | 4.58742600  | 0.53367800  | -0.67685700 |
| H  | 5.18792000  | 0.51135000  | -2.33668700 |
| C  | 3.64553200  | 2.37324800  | -3.44898700 |
| H  | 4.40258600  | 3.16404900  | -3.44405000 |
| H  | 3.96673400  | 1.58795500  | -4.13889300 |
| H  | 2.70534500  | 2.78598900  | -3.82485200 |
| C  | 2.90957900  | 4.22093100  | -1.35063300 |
| H  | 3.96516300  | 4.51105700  | -1.31540300 |
| H  | 2.50774800  | 4.47200300  | -2.33348100 |
| H  | 2.36924200  | 4.81325500  | -0.60540900 |
| Ni | -1.02618600 | 0.13935500  | -0.07087600 |

**<sup>2</sup>IM6**

|   |             |            |             |
|---|-------------|------------|-------------|
| C | -0.52178400 | 2.48985200 | 0.38815300  |
| C | -0.25253600 | 3.39303500 | 1.44294900  |
| C | -1.19372100 | 3.43902100 | 2.49475900  |
| H | -1.03210100 | 4.11117600 | 3.33350600  |
| C | -2.30832000 | 2.62876900 | 2.44137100  |
| H | -3.04563100 | 2.64415600 | 3.23735200  |
| C | -2.51283600 | 1.76349700 | 1.33944900  |
| C | 0.40748100  | 2.36660300 | -0.70003600 |
| C | 1.57031100  | 3.16927600 | -0.72600400 |
| C | 2.45116400  | 2.98412300 | -1.81224100 |

|    |             |             |             |
|----|-------------|-------------|-------------|
| C  | 0.96311400  | 1.27873500  | -2.67811400 |
| C  | 2.14952200  | 2.03764000  | -2.77086700 |
| H  | 3.35884100  | 3.57804700  | -1.87964400 |
| H  | 2.81654700  | 1.86283300  | -3.60846800 |
| N  | 0.10353900  | 1.45611400  | -1.66487500 |
| N  | -1.62934900 | 1.70702400  | 0.33891600  |
| Ni | -1.69065900 | 0.55894700  | -1.40617800 |
| C  | -3.74217100 | 0.91060000  | 1.21791900  |
| C  | -4.77133200 | 1.51595200  | 0.24449600  |
| H  | -4.19372100 | 0.76623300  | 2.20675200  |
| H  | -3.42719300 | -0.06334500 | 0.83975600  |
| C  | -5.95840400 | 0.57828900  | 0.00858300  |
| H  | -5.12248200 | 2.48615300  | 0.62445600  |
| H  | -4.26457600 | 1.69540500  | -0.71110000 |
| C  | -6.98865500 | 1.16498600  | -0.96033300 |
| H  | -5.57384900 | -0.36791500 | -0.39241600 |
| H  | -6.44107100 | 0.34228400  | 0.96796100  |
| H  | -7.82422300 | 0.47611900  | -1.12439300 |
| H  | -7.40160300 | 2.10643900  | -0.57851900 |
| H  | -6.52954000 | 1.37312500  | -1.93310800 |
| C  | 0.61161900  | 0.22420000  | -3.69427300 |
| C  | 0.79143100  | -1.21021400 | -3.15568800 |
| H  | 1.22129200  | 0.36296300  | -4.59460500 |
| H  | -0.43978900 | 0.36201900  | -3.97587100 |
| C  | 2.24064700  | -1.58684000 | -2.83382000 |
| H  | 0.17917300  | -1.32490300 | -2.25472000 |
| H  | 0.38288200  | -1.90716500 | -3.89885100 |
| C  | 2.36587000  | -3.04876100 | -2.38964700 |
| H  | 2.87247200  | -1.40767100 | -3.71598800 |
| H  | 2.61183900  | -0.92654000 | -2.04076600 |
| H  | 3.40906000  | -3.32726300 | -2.20382500 |
| H  | 1.79423500  | -3.22072700 | -1.47208200 |
| H  | 1.97850300  | -3.72674800 | -3.15984600 |
| C  | 0.93196400  | 4.20029400  | 1.38846200  |
| C  | 1.80092600  | 4.10040900  | 0.34085700  |
| H  | 1.12203600  | 4.89817200  | 2.19927400  |
| H  | 2.69306700  | 4.71968600  | 0.30332700  |
| O  | 2.62243700  | -1.19408200 | 2.00741500  |
| O  | 2.61380300  | 0.30096300  | 0.25851800  |
| C  | 3.97058500  | 0.30374500  | 0.78005000  |
| C  | 4.01169900  | -1.03507000 | 1.61449600  |
| B  | 1.86804200  | -0.49219400 | 1.09903300  |
| O  | 0.50989600  | -0.52305400 | 1.06528700  |
| C  | 4.94190200  | 0.36604500  | -0.39361000 |
| H  | 4.80174400  | 1.30819400  | -0.93028400 |
| H  | 5.97704800  | 0.31871100  | -0.04048300 |
| H  | 4.77353600  | -0.44851000 | -1.09910500 |
| C  | 4.10559300  | 1.55725900  | 1.65136500  |
| H  | 5.11761700  | 1.66195500  | 2.05276800  |
| H  | 3.87365100  | 2.43547300  | 1.04593600  |
| H  | 3.39765800  | 1.53146300  | 2.48448000  |
| C  | 4.87017900  | -0.98236900 | 2.87400600  |
| H  | 4.82537600  | -1.94645500 | 3.38792100  |
| H  | 5.91557100  | -0.77815400 | 2.62034500  |

|   |             |             |             |
|---|-------------|-------------|-------------|
| H | 4.51918000  | -0.21505400 | 3.56568300  |
| C | 4.37223600  | -2.26011900 | 0.76910300  |
| H | 5.42625900  | -2.25366300 | 0.47643100  |
| H | 4.17739900  | -3.16232300 | 1.35452200  |
| H | 3.75590600  | -2.30502800 | -0.13052400 |
| O | 0.06402200  | -2.74989100 | 0.26702600  |
| O | -1.60600200 | -1.60509700 | 1.36495500  |
| C | -1.13195700 | -3.56869700 | 0.10736600  |
| C | -2.11262200 | -2.95740400 | 1.19079000  |
| B | -0.31817100 | -1.59231800 | 0.90251400  |
| C | -2.00318800 | -3.63458800 | 2.56134900  |
| H | -2.57035800 | -3.04883400 | 3.28962600  |
| H | -2.40616300 | -4.65120800 | 2.54185200  |
| H | -0.96319000 | -3.67558900 | 2.89756500  |
| C | -3.56967300 | -2.87221400 | 0.74598500  |
| H | -3.96376500 | -3.86958700 | 0.52551800  |
| H | -4.17317600 | -2.43795800 | 1.54839800  |
| H | -3.67264300 | -2.24147700 | -0.13896400 |
| C | -0.73837900 | -5.02394200 | 0.34472900  |
| H | -1.61936000 | -5.67276500 | 0.31061900  |
| H | -0.04868100 | -5.34534900 | -0.44090200 |
| H | -0.24000900 | -5.15597900 | 1.30660900  |
| C | -1.62395000 | -3.37453500 | -1.32851700 |
| H | -0.81933700 | -3.64701800 | -2.01668100 |
| H | -2.48791500 | -4.01226300 | -1.53835500 |
| H | -1.90474800 | -2.33334200 | -1.51634600 |
| H | -2.95954000 | -0.27385700 | -1.80196300 |

**PR1p**

|   |             |             |             |
|---|-------------|-------------|-------------|
| C | 4.89273300  | -0.65695700 | -2.37351000 |
| C | 5.36066400  | 0.63598000  | -2.40571300 |
| C | 4.64964400  | 1.64905600  | -1.72211300 |
| C | 3.43454300  | 1.27200000  | -1.10572200 |
| C | 3.67774900  | -0.96433000 | -1.70994300 |
| C | 5.11563900  | 2.99852000  | -1.59822500 |
| C | 2.71735700  | 2.22481900  | -0.30244800 |
| C | 3.23409400  | 3.53277300  | -0.15033900 |
| C | 4.43416100  | 3.90473000  | -0.84024500 |
| C | 2.53331300  | 4.40020000  | 0.71702000  |
| C | 1.41636900  | 3.93955500  | 1.37466200  |
| C | 0.95152100  | 2.61638600  | 1.16784600  |
| H | 6.03761400  | 3.27730900  | -2.10017800 |
| H | 5.45117000  | -1.46490900 | -2.83422300 |
| H | 4.80222400  | 4.92038300  | -0.72725100 |
| H | 0.87368900  | 4.57827900  | 2.06341100  |
| N | 2.93734200  | 0.00508300  | -1.16746400 |
| N | 1.58900500  | 1.79472700  | 0.32981400  |
| H | 2.89361500  | 5.41379800  | 0.87023900  |
| H | 6.28924800  | 0.88130100  | -2.91394400 |
| C | -1.01262200 | -1.99473900 | -1.40079900 |
| H | -1.26944200 | -2.67028400 | -2.23104300 |
| H | -0.61091100 | -2.63652600 | -0.60553700 |
| C | -2.28735200 | -1.30590400 | -0.90272500 |
| H | -2.03159600 | -0.57723300 | -0.12776500 |

|    |              |             |             |
|----|--------------|-------------|-------------|
| H  | -2.75102800  | -0.74665800 | -1.72418000 |
| C  | -3.28470100  | -2.31223300 | -0.32311600 |
| H  | -2.82153200  | -2.86346800 | 0.50250700  |
| H  | -3.58423900  | -3.05123600 | -1.07674200 |
| S  | -4.79453100  | -1.56792300 | 0.40794400  |
| C  | -5.63437800  | -0.96874900 | -1.12564400 |
| H  | -5.01327000  | -0.20747200 | -1.60489200 |
| H  | -5.72532700  | -1.81924300 | -1.81084900 |
| C  | -6.98989100  | -0.40432600 | -0.78301100 |
| C  | -8.04878000  | -1.25861200 | -0.44405700 |
| C  | -7.21032000  | 0.97835700  | -0.77776700 |
| C  | -9.30068000  | -0.74180300 | -0.11356000 |
| H  | -7.88140700  | -2.33237600 | -0.43348800 |
| C  | -8.46318900  | 1.49841000  | -0.44695200 |
| H  | -6.39636600  | 1.64984800  | -1.03562300 |
| C  | -9.51159100  | 0.63969500  | -0.11394200 |
| H  | -10.11207100 | -1.41634700 | 0.14477700  |
| H  | -8.61850300  | 2.57360500  | -0.44949900 |
| H  | -10.48687400 | 1.04268100  | 0.14357900  |
| C  | -0.30277600  | 2.14232100  | 1.84641200  |
| C  | -1.54839000  | 2.41808400  | 0.98071300  |
| H  | -0.40522400  | 2.65252300  | 2.81090200  |
| H  | -0.20506200  | 1.07444600  | 2.05242700  |
| C  | -2.83383100  | 1.84559600  | 1.58518800  |
| H  | -1.65730400  | 3.50093800  | 0.82702000  |
| H  | -1.38748600  | 1.97868800  | -0.01078100 |
| C  | -4.05861800  | 2.10352900  | 0.70508400  |
| H  | -2.71648100  | 0.76473100  | 1.73192600  |
| H  | -2.99283100  | 2.27592300  | 2.58303100  |
| H  | -4.95829500  | 1.65092500  | 1.12924500  |
| H  | -4.23845600  | 3.17783000  | 0.57659200  |
| H  | -3.91529500  | 1.66675300  | -0.29025200 |
| C  | 3.28971000   | -2.39817900 | -1.47777800 |
| C  | 4.19006600   | -3.01545000 | -0.37871000 |
| H  | 3.37331000   | -2.97856800 | -2.40492400 |
| H  | 2.26112200   | -2.44264200 | -1.12655100 |
| C  | 3.59670200   | -4.30835300 | 0.18921900  |
| H  | 5.19495100   | -3.20012800 | -0.78272400 |
| H  | 4.30359200   | -2.28967500 | 0.43151400  |
| C  | 4.45843300   | -4.89404100 | 1.31102800  |
| H  | 2.60002500   | -4.07978400 | 0.58443400  |
| H  | 3.46649700   | -5.04428900 | -0.61736700 |
| H  | 4.02685200   | -5.82241700 | 1.69953400  |
| H  | 5.47364200   | -5.11743100 | 0.96100900  |
| H  | 4.52730900   | -4.18271100 | 2.13967100  |
| C  | 0.03043400   | 0.30031600  | -2.07938300 |
| C  | 0.10343700   | -1.08369000 | -1.87267100 |
| H  | 0.72379700   | 0.78329600  | -2.76494700 |
| H  | -0.88566300  | 0.85027700  | -1.88531200 |
| H  | 0.89506400   | -1.61123500 | -2.40117000 |
| Ni | 1.04480500   | -0.05438000 | -0.37725800 |
| H  | -0.21103000  | 0.01108400  | 0.24479300  |
| Cl | 2.42269000   | -1.02675200 | 2.22909200  |
| O  | 1.55647200   | -1.46242100 | 1.00489400  |



|   |            |             |            |
|---|------------|-------------|------------|
| O | 1.59557100 | -0.15149100 | 3.09784500 |
| O | 2.81629500 | -2.27916400 | 2.91242000 |
| O | 3.61579500 | -0.28970100 | 1.72170700 |

**TS1p**

|    |             |             |             |
|----|-------------|-------------|-------------|
| C  | -5.10035000 | 1.21123400  | -1.59249000 |
| C  | -5.81176000 | 0.05050400  | -1.39503100 |
| C  | -5.14576700 | -1.08969900 | -0.88787400 |
| C  | -3.74905500 | -0.98217200 | -0.70879400 |
| C  | -3.70269600 | 1.25031700  | -1.35113000 |
| C  | -5.81149400 | -2.30123000 | -0.50715800 |
| C  | -3.03269800 | -2.05276900 | -0.07681700 |
| C  | -3.72566600 | -3.19943300 | 0.36849500  |
| C  | -5.12953100 | -3.31496500 | 0.10128100  |
| C  | -2.97812900 | -4.15113200 | 1.09920500  |
| C  | -1.65275800 | -3.90247800 | 1.37731100  |
| C  | -1.01978500 | -2.72981300 | 0.89601600  |
| H  | -6.88055000 | -2.38150100 | -0.68170900 |
| H  | -5.59651000 | 2.12280100  | -1.90864600 |
| H  | -5.64571400 | -4.21576800 | 0.42025900  |
| H  | -1.07100900 | -4.59465200 | 1.97661400  |
| N  | -3.03918400 | 0.14419500  | -1.00749800 |
| N  | -1.70177700 | -1.85906200 | 0.14542500  |
| H  | -3.46444900 | -5.05184800 | 1.46352700  |
| H  | -6.88254200 | 0.01317400  | -1.57589000 |
| Ni | -1.04414900 | -0.32312400 | -0.89121000 |
| C  | -0.27170100 | 0.83502600  | -2.35849000 |
| C  | 0.08189100  | -0.50931200 | -2.59577800 |
| H  | -1.12995800 | 1.22260200  | -2.90401300 |
| H  | 0.19964900  | -0.99988600 | -0.98568600 |
| H  | -0.53944900 | -1.12991800 | -3.23901600 |
| H  | 1.12199900  | -0.82441100 | -2.56464400 |
| C  | 0.71185800  | 1.87483900  | -1.84971300 |
| H  | 1.05874600  | 2.48691300  | -2.69647200 |
| H  | 0.17585100  | 2.55461000  | -1.17911600 |
| C  | 1.91846400  | 1.29430000  | -1.09520200 |
| H  | 1.57991700  | 0.51042000  | -0.41387300 |
| H  | 2.61548600  | 0.82939300  | -1.80397500 |
| C  | 2.64892900  | 2.33459900  | -0.24600900 |
| H  | 1.98105900  | 2.69213500  | 0.54387700  |
| H  | 2.96521400  | 3.20402800  | -0.83481200 |
| S  | 4.11194600  | 1.63332000  | 0.61801900  |
| C  | 5.32335700  | 1.63333600  | -0.78261700 |
| H  | 4.79456400  | 1.33209700  | -1.69162800 |
| H  | 5.69441200  | 2.65304200  | -0.92593800 |
| C  | 6.45285900  | 0.68059500  | -0.49307000 |
| C  | 7.57861300  | 1.10082400  | 0.22579800  |
| C  | 6.37697300  | -0.65556500 | -0.90781000 |
| C  | 8.60994200  | 0.20664200  | 0.51898500  |
| H  | 7.64340500  | 2.13368900  | 0.55839300  |
| C  | 7.40700800  | -1.55033800 | -0.62022600 |
| H  | 5.50124900  | -0.99419400 | -1.45506000 |
| C  | 8.52750600  | -1.12117800 | 0.09606400  |
| H  | 9.47750000  | 0.54779700  | 1.07672200  |

|    |             |             |             |
|----|-------------|-------------|-------------|
| H  | 7.33587700  | -2.58127700 | -0.95594500 |
| H  | 9.33074100  | -1.81684600 | 0.32126200  |
| C  | 0.42269200  | -2.44772200 | 1.21553400  |
| C  | 1.41061800  | -3.11168000 | 0.23653500  |
| H  | 0.62814300  | -2.80316800 | 2.23152100  |
| H  | 0.56583900  | -1.36563200 | 1.23359900  |
| C  | 2.85953400  | -2.69805000 | 0.52094100  |
| H  | 1.31288900  | -4.20470800 | 0.29414200  |
| H  | 1.14566000  | -2.83487200 | -0.79288400 |
| C  | 3.86421300  | -3.35943500 | -0.42601300 |
| H  | 2.94869500  | -1.60596300 | 0.45065000  |
| H  | 3.10935300  | -2.95378100 | 1.55911200  |
| H  | 4.88734600  | -3.05722400 | -0.18530500 |
| H  | 3.81081000  | -4.45277400 | -0.36451100 |
| H  | 3.66787000  | -3.07902100 | -1.46855800 |
| C  | -2.97567700 | 2.56351500  | -1.31653100 |
| C  | -3.38334400 | 3.36310900  | -0.05468000 |
| H  | -3.17474100 | 3.15218900  | -2.22076400 |
| H  | -1.90993200 | 2.36723000  | -1.25119100 |
| C  | -2.39170300 | 4.49066300  | 0.25184300  |
| H  | -4.39692500 | 3.76778500  | -0.18088700 |
| H  | -3.41539100 | 2.67939900  | 0.79857600  |
| C  | -2.76927200 | 5.26142800  | 1.51913300  |
| H  | -1.40031600 | 4.04289000  | 0.39047200  |
| H  | -2.32543500 | 5.17356300  | -0.60756900 |
| H  | -2.05788900 | 6.06967700  | 1.71845000  |
| H  | -3.76786800 | 5.70705700  | 1.43373000  |
| H  | -2.76255100 | 4.58722700  | 2.38066700  |
| Cl | -1.31048900 | 1.06217300  | 2.06882400  |
| O  | -0.54433500 | 0.06504500  | 2.86334800  |
| O  | -2.72279100 | 0.60652100  | 1.89117400  |
| O  | -1.26735700 | 2.40982200  | 2.68942700  |
| O  | -0.65043900 | 1.18304200  | 0.68059700  |

#### IM1p

|   |             |             |             |
|---|-------------|-------------|-------------|
| C | -5.54953700 | 1.03792500  | -1.91840300 |
| C | -6.11050500 | -0.19759600 | -1.69055500 |
| C | -5.32016600 | -1.22899600 | -1.14023200 |
| C | -3.95397000 | -0.93347200 | -0.87956100 |
| C | -4.17914800 | 1.24836800  | -1.63389400 |
| C | -5.85709800 | -2.51925100 | -0.82922600 |
| C | -3.12930400 | -1.94295500 | -0.24465800 |
| C | -3.70868000 | -3.19723300 | 0.07682300  |
| C | -5.07845900 | -3.46876700 | -0.24419700 |
| C | -2.89707600 | -4.14469000 | 0.73584600  |
| C | -1.60241900 | -3.81917300 | 1.05835200  |
| C | -1.08575600 | -2.54830400 | 0.71987100  |
| H | -6.90085300 | -2.71640900 | -1.05688400 |
| H | -6.14312700 | 1.85751600  | -2.30982800 |
| H | -5.48301000 | -4.44497800 | 0.00699500  |
| H | -0.96319500 | -4.51995700 | 1.58405000  |
| N | -3.40490500 | 0.27182500  | -1.16159500 |
| N | -1.83177700 | -1.64901100 | 0.06523000  |
| H | -3.31146600 | -5.11496900 | 0.99596300  |

|    |             |             |             |
|----|-------------|-------------|-------------|
| H  | -7.15876300 | -0.38504200 | -1.90769900 |
| Ni | -1.09847500 | 0.15738400  | -0.47333100 |
| C  | -0.19884700 | 1.55357200  | -1.37596600 |
| C  | -0.08825400 | 0.45152600  | -2.37965300 |
| H  | -0.90347300 | 2.32927600  | -1.66950600 |
| H  | 0.91733000  | 0.06168100  | -2.54635800 |
| H  | -0.67436700 | -0.48346900 | -2.00637400 |
| H  | -0.59539400 | 0.64206000  | -3.32889300 |
| C  | 1.01521400  | 2.17398800  | -0.71016900 |
| H  | 1.46697900  | 2.92158900  | -1.38343800 |
| H  | 0.64374600  | 2.73116100  | 0.15870300  |
| C  | 2.10607400  | 1.20401900  | -0.24297000 |
| H  | 1.65751700  | 0.43008700  | 0.38477800  |
| H  | 2.55624100  | 0.69402100  | -1.10374500 |
| C  | 3.19027800  | 1.93597700  | 0.55451400  |
| H  | 2.78528800  | 2.26863400  | 1.51569000  |
| H  | 3.52572000  | 2.83433900  | 0.02140200  |
| S  | 4.67619100  | 0.93725500  | 0.96530300  |
| C  | 5.51105800  | 0.96027800  | -0.68442000 |
| H  | 4.87870700  | 0.45342400  | -1.41839100 |
| H  | 5.60950900  | 2.00970300  | -0.98637900 |
| C  | 6.86387800  | 0.29663700  | -0.60888500 |
| C  | 7.88924600  | 0.85770700  | 0.16659300  |
| C  | 7.12190700  | -0.88649700 | -1.31162600 |
| C  | 9.14136100  | 0.24907800  | 0.23620500  |
| H  | 7.69437500  | 1.77031200  | 0.72313300  |
| C  | 8.37597700  | -1.49755500 | -1.24424000 |
| H  | 6.33737600  | -1.32836500 | -1.91935000 |
| C  | 9.38872600  | -0.93212400 | -0.46886600 |
| H  | 9.92514500  | 0.69589700  | 0.84134200  |
| H  | 8.55928500  | -2.41453200 | -1.79722800 |
| H  | 10.36437200 | -1.40645400 | -0.41389800 |
| C  | 0.33926200  | -2.21646800 | 1.06686300  |
| C  | 1.31092500  | -2.49166500 | -0.09771300 |
| H  | 0.63236400  | -2.81979200 | 1.93288200  |
| H  | 0.39770000  | -1.17120600 | 1.37771900  |
| C  | 2.77695800  | -2.40986200 | 0.33750100  |
| H  | 1.10746000  | -3.48291700 | -0.52640800 |
| H  | 1.11805500  | -1.76346000 | -0.89534700 |
| C  | 3.75419200  | -2.54463300 | -0.83154100 |
| H  | 2.96181300  | -1.45798300 | 0.84616400  |
| H  | 2.97453100  | -3.19719900 | 1.07739900  |
| H  | 4.78988200  | -2.47668300 | -0.48717900 |
| H  | 3.62913900  | -3.50060300 | -1.35394600 |
| H  | 3.59568100  | -1.74404600 | -1.56505100 |
| C  | -3.56854900 | 2.61941400  | -1.78001700 |
| C  | -3.19361700 | 3.20036000  | -0.40185400 |
| H  | -4.26689300 | 3.28518900  | -2.29950600 |
| H  | -2.67361400 | 2.54879600  | -2.40827600 |
| C  | -2.43302700 | 4.52707300  | -0.46911900 |
| H  | -4.10641100 | 3.32345800  | 0.19493000  |
| H  | -2.58451500 | 2.46604400  | 0.12912400  |
| C  | -1.99716800 | 4.99143100  | 0.92521900  |
| H  | -1.54621200 | 4.40581100  | -1.10677800 |

|    |             |             |             |
|----|-------------|-------------|-------------|
| H  | -3.05202500 | 5.29657200  | -0.95126200 |
| H  | -1.41302800 | 5.91649700  | 0.87847200  |
| H  | -2.86664000 | 5.17418400  | 1.56634200  |
| H  | -1.39102000 | 4.22252100  | 1.41650200  |
| Cl | -1.91946100 | 0.68877000  | 2.42331500  |
| O  | -0.91984600 | 1.02539700  | 1.23951900  |
| O  | -1.48013700 | -0.59069600 | 3.03533500  |
| O  | -1.79438800 | 1.82643300  | 3.35397400  |
| O  | -3.28927800 | 0.56998800  | 1.86324900  |

**TS2p**

|   |             |             |             |
|---|-------------|-------------|-------------|
| C | 5.47211600  | -0.43524000 | -1.52172700 |
| C | 5.75197500  | 0.89323000  | -1.27985700 |
| C | 4.73443500  | 1.74631300  | -0.79863000 |
| C | 3.45000600  | 1.17362900  | -0.61696900 |
| C | 4.16719400  | -0.93082400 | -1.29516400 |
| C | 4.95262100  | 3.12220600  | -0.46299300 |
| C | 2.37339300  | 1.98080200  | -0.09213100 |
| C | 2.64708100  | 3.31337400  | 0.29504800  |
| C | 3.94971500  | 3.87166000  | 0.07483300  |
| C | 1.60574900  | 4.02279100  | 0.93146200  |
| C | 0.40056500  | 3.40076100  | 1.15160300  |
| C | 0.17375400  | 2.08125900  | 0.68650300  |
| H | 5.94047700  | 3.54608200  | -0.61949600 |
| H | 6.24372000  | -1.11328500 | -1.87129500 |
| H | 4.12231000  | 4.90499600  | 0.36182000  |
| H | -0.38859800 | 3.90339200  | 1.69608900  |
| N | 3.19329900  | -0.12907900 | -0.86680800 |
| N | 1.14381800  | 1.40690900  | 0.05630200  |
| H | 1.77858100  | 5.04011600  | 1.27210500  |
| H | 6.75160000  | 1.28929500  | -1.43789500 |
| C | -1.15304900 | 1.41353200  | 0.94585400  |
| C | -2.38007400 | 1.97922700  | 0.19587800  |
| H | -1.33692800 | 1.47251300  | 2.02450600  |
| H | -1.04756400 | 0.34966900  | 0.73256600  |
| C | -2.88169000 | 3.35963200  | 0.63808800  |
| H | -2.18526500 | 2.00791900  | -0.88431100 |
| H | -3.18412600 | 1.24821200  | 0.33890800  |
| C | -4.24362200 | 3.69828900  | 0.02108600  |
| H | -2.96031300 | 3.38288400  | 1.73362700  |
| H | -2.15819300 | 4.13550400  | 0.35972000  |
| H | -4.58582400 | 4.69382900  | 0.32197000  |
| H | -4.19387100 | 3.68102600  | -1.07455100 |
| H | -5.00276200 | 2.97188200  | 0.32994700  |
| C | 3.82003400  | -2.38781000 | -1.44934300 |
| C | 3.62305600  | -3.05550500 | -0.06967000 |
| H | 4.58832200  | -2.90806800 | -2.03179200 |
| H | 2.87976800  | -2.45258400 | -2.00925100 |
| C | 2.82920600  | -4.36239700 | -0.13084500 |
| H | 4.60366600  | -3.22652100 | 0.39336900  |
| H | 3.09156900  | -2.35612200 | 0.57838400  |
| C | 2.59711800  | -4.95104500 | 1.26465100  |
| H | 1.85823500  | -4.15608300 | -0.60345500 |

|    |             |             |             |
|----|-------------|-------------|-------------|
| H  | 3.34140800  | -5.09126900 | -0.77498100 |
| H  | 1.99484300  | -5.86459200 | 1.21922100  |
| H  | 3.54872500  | -5.20178800 | 1.74775900  |
| H  | 2.08057800  | -4.22850600 | 1.90515300  |
| Ni | 1.06757000  | -0.53617300 | -0.62548800 |
| C  | 0.65499700  | -0.16112200 | -2.53753300 |
| C  | -0.16517900 | -1.24804600 | -2.12380200 |
| H  | 0.95977400  | -1.90283400 | -1.00958900 |
| H  | 1.53178700  | -0.44348200 | -3.12323500 |
| C  | 0.16789100  | 1.23847400  | -2.82403600 |
| H  | 0.98389300  | 1.95827500  | -2.71311200 |
| H  | -0.20370100 | 1.31243000  | -3.85513000 |
| H  | -0.63441900 | 1.54654300  | -2.15412900 |
| H  | 0.06675600  | -2.22085500 | -2.55992600 |
| C  | -1.61274500 | -1.12715800 | -1.69958700 |
| C  | -1.99007700 | -2.11838100 | -0.58554000 |
| H  | -2.23979700 | -1.30720200 | -2.58459900 |
| H  | -1.82523800 | -0.11317500 | -1.36392300 |
| H  | -2.02459200 | -3.14443100 | -0.96882000 |
| H  | -1.23374700 | -2.08707400 | 0.20546900  |
| S  | -3.54833600 | -1.71128600 | 0.29161600  |
| C  | -4.78679600 | -1.72920500 | -1.08394300 |
| H  | -5.01764700 | -2.76500400 | -1.35097600 |
| H  | -4.34508900 | -1.23905700 | -1.95530600 |
| C  | -6.02231800 | -0.98805900 | -0.64282200 |
| C  | -6.10819600 | 0.40162500  | -0.80755100 |
| C  | -7.08326400 | -1.66174000 | -0.02657700 |
| C  | -7.23480700 | 1.10097000  | -0.37709500 |
| H  | -5.28321500 | 0.93542200  | -1.27208200 |
| C  | -8.21176900 | -0.96357900 | 0.40820400  |
| H  | -7.02212800 | -2.73785100 | 0.11412800  |
| C  | -8.29105700 | 0.41891700  | 0.23318000  |
| H  | -7.28880200 | 2.17669500  | -0.51901400 |
| H  | -9.02815200 | -1.50022200 | 0.88309300  |
| H  | -9.16967800 | 0.96207500  | 0.56893900  |
| Cl | 1.55587500  | -0.81291800 | 2.47995600  |
| O  | 2.91629700  | -0.35428100 | 2.09297000  |
| O  | 1.60617500  | -1.96601000 | 3.40202400  |
| O  | 0.75886200  | 0.30968900  | 3.03667000  |
| O  | 0.82213500  | -1.33565000 | 1.19192700  |

#### IM2<sub>p</sub>

|   |             |             |             |
|---|-------------|-------------|-------------|
| C | -3.94652700 | 1.83699800  | -2.41685100 |
| C | -4.72114500 | 0.73365000  | -2.68912900 |
| C | -4.41321500 | -0.50169100 | -2.07291500 |
| C | -3.26335200 | -0.53594600 | -1.25173800 |
| C | -2.81378200 | 1.72895800  | -1.56955300 |
| C | -5.21194800 | -1.68223000 | -2.21875600 |
| C | -2.94916800 | -1.72818200 | -0.51125200 |
| C | -3.78950200 | -2.85929900 | -0.63328000 |
| C | -4.90941100 | -2.81822400 | -1.52707600 |
| C | -3.48311600 | -3.97268500 | 0.18037200  |
| C | -2.43368900 | -3.89139600 | 1.06550000  |

|    |             |             |             |
|----|-------------|-------------|-------------|
| C  | -1.63510300 | -2.72077600 | 1.13992800  |
| H  | -6.07637900 | -1.64614200 | -2.87534500 |
| H  | -4.19341600 | 2.80875600  | -2.83118000 |
| H  | -5.52840200 | -3.70568600 | -1.62200600 |
| H  | -2.20108800 | -4.71829300 | 1.72726000  |
| N  | -2.45703300 | 0.54565400  | -1.06714800 |
| N  | -1.87919500 | -1.68302000 | 0.33478300  |
| H  | -4.09510600 | -4.86847400 | 0.12014400  |
| H  | -5.58583700 | 0.80618400  | -3.34321300 |
| C  | -0.51907800 | -2.63611200 | 2.14945800  |
| C  | 0.86032700  | -3.09148900 | 1.63036000  |
| H  | -0.79967200 | -3.25715400 | 3.00833200  |
| H  | -0.46069300 | -1.60479200 | 2.50210700  |
| C  | 0.90984200  | -4.51288500 | 1.06153500  |
| H  | 1.19680100  | -2.38229100 | 0.86911900  |
| H  | 1.57008500  | -3.00704600 | 2.46310800  |
| C  | 2.31318600  | -4.90025300 | 0.58524700  |
| H  | 0.56516200  | -5.22697000 | 1.82274900  |
| H  | 0.20559500  | -4.59970800 | 0.22324900  |
| H  | 2.33478800  | -5.91576500 | 0.17686400  |
| H  | 2.66117600  | -4.21716500 | -0.19832200 |
| H  | 3.03597300  | -4.85414300 | 1.40753200  |
| C  | -2.08457600 | 2.96605600  | -1.12430400 |
| C  | -2.94167000 | 3.74676300  | -0.09793800 |
| H  | -1.85400200 | 3.60692200  | -1.98456100 |
| H  | -1.15253700 | 2.68356200  | -0.63790800 |
| C  | -2.11944800 | 4.79656800  | 0.65575600  |
| H  | -3.79031000 | 4.22090100  | -0.61020500 |
| H  | -3.36234600 | 3.03929800  | 0.62223100  |
| C  | -2.95532800 | 5.54084100  | 1.70013900  |
| H  | -1.29093200 | 4.28432200  | 1.15832100  |
| H  | -1.67862600 | 5.50713000  | -0.05826700 |
| H  | -2.35596400 | 6.29127600  | 2.22601300  |
| H  | -3.80723900 | 6.05554400  | 1.23914000  |
| H  | -3.33930200 | 4.83551700  | 2.44333100  |
| Ni | -0.74432900 | -0.02448300 | -0.10311800 |
| C  | 0.19118000  | -0.55508400 | -1.82388800 |
| C  | 0.58724500  | 0.73752300  | -1.43226300 |
| H  | 0.38332700  | -0.51100900 | 0.58785200  |
| H  | -0.62552100 | -0.62035900 | -2.54413800 |
| C  | 1.05795700  | -1.78919800 | -1.78298500 |
| H  | 0.48274800  | -2.66482300 | -1.46708300 |
| H  | 1.45526000  | -2.00018900 | -2.78463100 |
| H  | 1.90436300  | -1.67929600 | -1.10299000 |
| H  | 0.07030000  | 1.56685700  | -1.91234500 |
| C  | 1.94708100  | 1.09747900  | -0.87742600 |
| C  | 2.95454200  | 1.35292800  | -2.01124100 |
| H  | 2.30953200  | 0.29703100  | -0.22901200 |
| H  | 1.86712400  | 1.98819200  | -0.24704400 |
| H  | 3.00537000  | 0.48391200  | -2.67819100 |
| H  | 2.64060400  | 2.20773000  | -2.62008200 |
| S  | 4.65168000  | 1.76185100  | -1.44484600 |
| C  | 5.15311000  | 0.11698000  | -0.76231100 |
| H  | 5.05336100  | -0.62743900 | -1.55971500 |

|    |             |             |             |
|----|-------------|-------------|-------------|
| H  | 4.47245300  | -0.15379000 | 0.04966400  |
| C  | 6.57134900  | 0.18526800  | -0.25889200 |
| C  | 7.64722200  | -0.08043000 | -1.11578500 |
| C  | 6.83622500  | 0.54655400  | 1.06841200  |
| C  | 8.96077100  | 0.00067300  | -0.65294400 |
| H  | 7.45036500  | -0.35050400 | -2.15020800 |
| C  | 8.14888300  | 0.62923500  | 1.53359100  |
| H  | 6.00734600  | 0.76502000  | 1.73688900  |
| C  | 9.21477200  | 0.35517800  | 0.67388200  |
| H  | 9.78530900  | -0.21283400 | -1.32726000 |
| H  | 8.33908200  | 0.90687000  | 2.56641400  |
| H  | 10.23711100 | 0.41726400  | 1.03564700  |
| Cl | -2.12698900 | 1.17519900  | 2.43682400  |
| O  | -0.98784100 | 1.35516000  | 1.38650300  |
| O  | -3.37797500 | 0.79176400  | 1.72112400  |
| O  | -1.72086700 | 0.11010900  | 3.38891800  |
| O  | -2.27468300 | 2.48747100  | 3.10610600  |

**TS3p**

|    |             |             |             |
|----|-------------|-------------|-------------|
| C  | 2.84379700  | -3.44202600 | -1.80159000 |
| C  | 4.16796000  | -3.07610300 | -1.74967200 |
| C  | 4.51324000  | -1.81830200 | -1.20417400 |
| C  | 3.44696800  | -0.96350900 | -0.84462800 |
| C  | 1.83077100  | -2.54514000 | -1.37562900 |
| C  | 5.86263600  | -1.40816800 | -0.95058400 |
| C  | 3.72461300  | 0.26887800  | -0.16516300 |
| C  | 5.05875100  | 0.59893400  | 0.16327200  |
| C  | 6.12525900  | -0.24769600 | -0.28387100 |
| C  | 5.25420300  | 1.74027400  | 0.97135100  |
| C  | 4.16041500  | 2.44892000  | 1.41103300  |
| C  | 2.85027200  | 2.08321000  | 1.01260700  |
| H  | 6.67103500  | -2.06214500 | -1.26444200 |
| H  | 2.54990700  | -4.43056800 | -2.13830700 |
| H  | 7.14668300  | 0.04083600  | -0.05364600 |
| H  | 4.27954500  | 3.30198700  | 2.06912000  |
| N  | 2.13390500  | -1.29747700 | -1.00456300 |
| N  | 2.65444100  | 1.02756200  | 0.21475700  |
| H  | 6.26037700  | 2.02817900  | 1.26305800  |
| H  | 4.95084000  | -3.75825900 | -2.06964100 |
| Ni | 0.99413600  | 0.36632900  | -0.65004900 |
| C  | -0.48241900 | 0.05800400  | -1.98636500 |
| C  | 0.00011200  | 1.36805300  | -2.20920000 |
| H  | -0.08878100 | -0.72439200 | -2.63392700 |
| H  | 0.44345800  | 1.67679500  | -0.57350600 |
| H  | 0.83250700  | 1.46791000  | -2.90772700 |
| C  | -1.84110900 | -0.20033900 | -1.37131100 |
| H  | -1.86248800 | -1.17916400 | -0.88788000 |
| H  | -2.01168100 | 0.51936100  | -0.56632900 |
| C  | -2.97048800 | -0.13105200 | -2.41225900 |
| H  | -3.01519200 | 0.85905100  | -2.87933200 |
| H  | -2.79101300 | -0.85655500 | -3.21335300 |
| C  | 1.66916300  | 2.90027800  | 1.46028400  |
| C  | 1.37289500  | 4.09127300  | 0.52281900  |

|    |             |             |             |
|----|-------------|-------------|-------------|
| H  | 1.86531800  | 3.27179000  | 2.47224300  |
| H  | 0.80417600  | 2.24009300  | 1.53224600  |
| C  | 2.40743700  | 5.22211600  | 0.55736100  |
| H  | 1.28558400  | 3.71839400  | -0.50452500 |
| H  | 0.38830900  | 4.49515300  | 0.79050100  |
| C  | 2.02438800  | 6.38943300  | -0.35777100 |
| H  | 2.51779700  | 5.58157800  | 1.58977100  |
| H  | 3.39002000  | 4.83470200  | 0.25949700  |
| H  | 2.77134500  | 7.18894800  | -0.32431200 |
| H  | 1.93597900  | 6.05891800  | -1.39940300 |
| H  | 1.06007800  | 6.81974200  | -0.06474900 |
| C  | 0.42935100  | -3.03830000 | -1.17348600 |
| C  | 0.36227700  | -3.93617700 | 0.08790200  |
| H  | 0.06865800  | -3.58689400 | -2.05220100 |
| H  | -0.21619000 | -2.18556300 | -0.99979700 |
| C  | -1.07559200 | -4.10570600 | 0.59000700  |
| H  | 0.81285000  | -4.91488100 | -0.12682800 |
| H  | 0.96128400  | -3.47459600 | 0.87841400  |
| C  | -1.14483300 | -4.95536100 | 1.86149900  |
| H  | -1.48109300 | -3.11022100 | 0.80539800  |
| H  | -1.69865900 | -4.54680700 | -0.20115300 |
| H  | -2.17917800 | -5.07867400 | 2.19902100  |
| H  | -0.72375400 | -5.95510900 | 1.69852900  |
| H  | -0.58418900 | -4.46900600 | 2.66540000  |
| C  | -0.86484700 | 2.61735200  | -2.14525100 |
| H  | -1.38737300 | 2.72858700  | -3.10311800 |
| H  | -0.26661800 | 3.51788500  | -1.98933100 |
| H  | -1.61564600 | 2.56537700  | -1.35411100 |
| S  | -4.63147300 | -0.55701100 | -1.75910500 |
| C  | -4.88667200 | 0.85018400  | -0.58565100 |
| H  | -4.11674000 | 0.81160600  | 0.18947800  |
| H  | -4.77237400 | 1.78556400  | -1.14451100 |
| C  | -6.25842800 | 0.75050100  | 0.02928600  |
| C  | -7.36691000 | 1.33415900  | -0.59773400 |
| C  | -6.44965000 | 0.04399700  | 1.22369400  |
| C  | -8.63924900 | 1.22547500  | -0.03633800 |
| H  | -7.22801800 | 1.87417700  | -1.53097200 |
| C  | -7.72153200 | -0.06708400 | 1.78646500  |
| H  | -5.59599100 | -0.41962300 | 1.71137600  |
| C  | -8.81953300 | 0.52459800  | 1.15833200  |
| H  | -9.48920300 | 1.68763100  | -0.53060700 |
| H  | -7.85415600 | -0.61420000 | 2.71544500  |
| H  | -9.80966000 | 0.44074200  | 1.59720900  |
| Cl | 0.68466200  | -0.92489700 | 2.31660300  |
| O  | -0.08815800 | -0.58152500 | 1.02934200  |
| O  | 1.99766600  | -1.53474700 | 1.94108300  |
| O  | 0.90650600  | 0.33579000  | 3.07823200  |
| O  | -0.14065300 | -1.89011600 | 3.08372300  |

### IM3p

|    |            |             |             |
|----|------------|-------------|-------------|
| Ni | 1.13035800 | -0.22945000 | -0.11706200 |
| C  | 2.59408300 | 3.86966400  | 0.72074600  |
| C  | 3.80947200 | 0.22373000  | -0.91121200 |



|   |             |             |             |
|---|-------------|-------------|-------------|
| C | 5.14103500  | 0.08140800  | -1.37650000 |
| C | 5.54122400  | -1.19624400 | -1.81579000 |
| C | 4.65022600  | -2.23791600 | -1.73432300 |
| C | 3.32345900  | -2.02767000 | -1.28831600 |
| N | 2.89497100  | -0.79931700 | -0.94258500 |
| H | 6.55156000  | -1.34868600 | -2.18488000 |
| H | 4.94408800  | -3.24105700 | -2.02193000 |
| C | 3.40913400  | 1.48851800  | -0.34601500 |
| C | 4.31726200  | 2.57561200  | -0.34930400 |
| C | 3.86763500  | 3.79156700  | 0.21139500  |
| C | 1.74387900  | 2.73537300  | 0.70636600  |
| N | 2.16579900  | 1.57142600  | 0.19998800  |
| H | 4.53369900  | 4.64969300  | 0.23472600  |
| H | 2.22140400  | 4.79278600  | 1.15152600  |
| C | 0.32635600  | 2.87294300  | 1.18657300  |
| C | -0.61395400 | 3.25396900  | 0.02223500  |
| H | 0.28536500  | 3.64899700  | 1.95859000  |
| H | -0.00403100 | 1.94107200  | 1.64149700  |
| C | -2.04858900 | 3.52174300  | 0.49250700  |
| H | -0.22468100 | 4.14075200  | -0.49758400 |
| H | -0.60519800 | 2.43786100  | -0.71094700 |
| C | -3.01841500 | 3.76935200  | -0.66592600 |
| H | -2.40818200 | 2.67250600  | 1.08403700  |
| H | -2.04609300 | 4.38761600  | 1.16816100  |
| H | -4.03070300 | 3.96288900  | -0.29801300 |
| H | -2.70767900 | 4.62754500  | -1.27363700 |
| H | -3.07024900 | 2.89533900  | -1.32448000 |
| C | -2.24358200 | 0.08555300  | -0.17086800 |
| H | -1.67054400 | 0.60867300  | 0.59283500  |
| H | -2.26790200 | 0.72399800  | -1.05962500 |
| C | -1.58970500 | -1.26558700 | -0.46878400 |
| H | -1.50128500 | -1.82601400 | 0.46527300  |
| H | -2.25606700 | -1.84572500 | -1.12787000 |
| C | -0.27187500 | -0.38484200 | -2.48096200 |
| H | -0.21180200 | 0.69890400  | -2.29588800 |
| H | -1.26902700 | -0.53422900 | -2.92795900 |
| C | 6.03337200  | 1.20220700  | -1.37079900 |
| H | 7.03918100  | 1.06105400  | -1.75525300 |
| C | 5.63315700  | 2.40994500  | -0.88700500 |
| H | 6.30863400  | 3.26036800  | -0.88150700 |
| C | -4.86846300 | -0.26836000 | -1.09610500 |
| H | -4.57622800 | -1.23528200 | -1.51667500 |
| H | -4.56713700 | 0.51617600  | -1.79946600 |
| C | 0.51500500  | -4.87821000 | 1.83070200  |
| H | -0.27653200 | -5.63225300 | 1.89078900  |
| H | 1.36735700  | -5.23871700 | 2.41787300  |
| H | 0.15550000  | -3.96075000 | 2.30781400  |
| C | 2.41632900  | -3.22403800 | -1.17318400 |
| H | 2.93683300  | -4.09575400 | -1.58329400 |
| H | 1.53662900  | -3.07031900 | -1.79934000 |
| C | 1.98568500  | -3.51520200 | 0.27809300  |
| H | 1.59443100  | -2.60104000 | 0.72859100  |
| H | 2.87032700  | -3.78771700 | 0.86779100  |
| C | 0.92467700  | -4.61397700 | 0.37791300  |

|    |              |             |             |
|----|--------------|-------------|-------------|
| H  | 1.29549800   | -5.53885700 | -0.08631400 |
| H  | 0.04283800   | -4.30939200 | -0.20230700 |
| C  | -0.21670000  | -1.17370000 | -1.15532800 |
| H  | 0.08235300   | -2.20128200 | -1.36546400 |
| C  | 0.78060700   | -0.76665300 | -3.52776400 |
| H  | 0.62795100   | -0.21158900 | -4.45946000 |
| H  | 1.79335200   | -0.55582000 | -3.17618800 |
| H  | 0.72465500   | -1.83520100 | -3.76637400 |
| S  | -3.95313200  | 0.00704500  | 0.48635300  |
| C  | -6.35267100  | -0.21781000 | -0.84684800 |
| C  | -7.02958200  | 1.00928900  | -0.84846200 |
| C  | -7.07433200  | -1.38672000 | -0.57509700 |
| C  | -8.40020300  | 1.06585600  | -0.59749700 |
| H  | -6.47250000  | 1.92218200  | -1.04427400 |
| C  | -8.44582600  | -1.33331400 | -0.32221300 |
| H  | -6.55502800  | -2.34157700 | -0.56012000 |
| C  | -9.11272000  | -0.10668900 | -0.33430500 |
| H  | -8.91241300  | 2.02394700  | -0.60655500 |
| H  | -8.99288000  | -2.24892300 | -0.11574300 |
| H  | -10.18053100 | -0.06409900 | -0.13934000 |
| Cl | 1.04138500   | -0.50615000 | 2.81201400  |
| O  | 0.10257200   | -0.28815400 | 1.55473500  |
| O  | 2.41754500   | -0.77318000 | 2.30538400  |
| O  | 0.99108100   | 0.73990400  | 3.60813400  |
| O  | 0.49009000   | -1.66546600 | 3.53893400  |

**PR1''**

|   |             |             |             |
|---|-------------|-------------|-------------|
| C | -3.87530000 | -2.32757200 | 1.03970300  |
| C | -2.57113700 | 1.50260500  | 0.05693600  |
| C | -3.48900400 | 2.57827500  | 0.02623900  |
| C | -2.95744200 | 3.86552700  | -0.20563100 |
| C | -1.59832400 | 4.01554500  | -0.35333300 |
| N | -1.22702900 | 1.65588900  | -0.13956000 |
| H | -3.62101900 | 4.72432500  | -0.24701100 |
| H | -1.16466100 | 4.99755900  | -0.50481500 |
| C | -3.04688500 | 0.18116200  | 0.35023400  |
| C | -4.42105800 | -0.02618800 | 0.60292300  |
| C | -4.82257300 | -1.33681700 | 0.94449600  |
| C | -2.51034200 | -2.06144900 | 0.77103500  |
| N | -2.11667500 | -0.82741300 | 0.40892600  |
| H | -5.86959000 | -1.54535800 | 1.14391400  |
| H | -4.15553600 | -3.33678600 | 1.31977500  |
| C | -1.52859700 | -3.19631800 | 0.85262900  |
| C | -1.41343700 | -3.95254000 | -0.48882600 |
| H | -1.85927500 | -3.89125600 | 1.63236600  |
| H | -0.54830900 | -2.81277000 | 1.14497500  |
| C | -0.35989600 | -5.06436900 | -0.44117800 |
| H | -2.39256300 | -4.37360700 | -0.75181200 |
| H | -1.15750400 | -3.23466500 | -1.27815900 |
| C | -0.24201200 | -5.81612400 | -1.77012800 |
| H | 0.61107000  | -4.62357200 | -0.17605800 |
| H | -0.60886800 | -5.76780400 | 0.36429600  |
| H | 0.52048600  | -6.59865700 | -1.71654000 |

|    |             |             |             |
|----|-------------|-------------|-------------|
| H  | -1.19068700 | -6.29252900 | -2.04021600 |
| H  | 0.03217200  | -5.13611600 | -2.58453400 |
| C  | -4.88317200 | 2.33276200  | 0.24564600  |
| H  | -5.57157800 | 3.17065600  | 0.19742000  |
| C  | -5.33240800 | 1.07670900  | 0.52459900  |
| H  | -6.38654300 | 0.89077200  | 0.70465100  |
| C  | 3.75075900  | 2.62895600  | 2.08230100  |
| H  | 4.82701100  | 2.78930700  | 1.97106500  |
| H  | 3.40440800  | 3.25437300  | 2.91201000  |
| H  | 3.59475500  | 1.58305800  | 2.36425700  |
| C  | 0.75126900  | 3.10225500  | -0.40325600 |
| H  | 0.94249800  | 4.15003600  | -0.65338100 |
| H  | 1.14814000  | 2.51402100  | -1.23203800 |
| C  | 1.49148500  | 2.74862200  | 0.90108700  |
| H  | 1.28364400  | 1.70454200  | 1.16457500  |
| H  | 1.08984800  | 3.35776800  | 1.72082000  |
| C  | 3.00409000  | 2.97098400  | 0.79019500  |
| H  | 3.19535500  | 4.01620800  | 0.51554900  |
| H  | 3.40258800  | 2.36784600  | -0.03752600 |
| C  | -0.73654500 | 2.89216900  | -0.31051700 |
| C  | 2.52269100  | -0.12951000 | -0.83699400 |
| C  | 2.43819100  | 0.54560300  | -2.94650000 |
| O  | 2.75245500  | 0.86637400  | -4.04160700 |
| O  | 3.28607500  | 0.15398500  | -1.92017000 |
| O  | 1.16927200  | 0.49398100  | -2.43031500 |
| N  | 1.25854600  | 0.07010200  | -1.07733900 |
| C  | 3.16679000  | -0.57323600 | 0.38480100  |
| C  | 4.57211600  | -0.64757600 | 0.41458000  |
| C  | 2.41923900  | -0.90427900 | 1.53087900  |
| C  | 5.21660600  | -1.04856200 | 1.58048900  |
| H  | 5.14738000  | -0.38929400 | -0.46712500 |
| C  | 3.07565700  | -1.30886700 | 2.68770300  |
| H  | 1.33664100  | -0.84469900 | 1.51339100  |
| C  | 4.47233200  | -1.38002600 | 2.71590500  |
| H  | 6.29989100  | -1.10194800 | 1.60315600  |
| H  | 2.49909300  | -1.56369700 | 3.57088100  |
| H  | 4.97973400  | -1.69100100 | 3.62367800  |
| Ni | -0.40850400 | -0.25420200 | -0.25416900 |
| H  | 0.02468200  | -1.61027000 | -0.34436400 |

**TS1''**

|   |             |             |             |
|---|-------------|-------------|-------------|
| C | -1.98264700 | -3.86603200 | 0.41642300  |
| C | -3.09125800 | 0.12250400  | -0.02671200 |
| C | -4.45342500 | 0.49340300  | -0.01358400 |
| C | -4.73172600 | 1.87995200  | -0.00310900 |
| C | -3.69024100 | 2.77921200  | 0.03165900  |
| N | -2.06674600 | 1.02385300  | -0.05440300 |
| H | -5.76228900 | 2.22296600  | -0.00009300 |
| H | -3.88176700 | 3.84548400  | 0.07356800  |
| C | -2.73776300 | -1.26342200 | 0.05479700  |
| C | -3.74754400 | -2.24569900 | 0.13479300  |
| C | -3.32492800 | -3.58563300 | 0.29547800  |
| C | -1.01481500 | -2.83656300 | 0.33848000  |
| N | -1.40092000 | -1.56847300 | 0.11457100  |

|    |             |             |             |
|----|-------------|-------------|-------------|
| H  | -4.06412200 | -4.37944600 | 0.35106100  |
| H  | -1.64075900 | -4.88190100 | 0.58010400  |
| C  | 0.44216100  | -3.16310000 | 0.51051500  |
| C  | 1.13309500  | -3.59712100 | -0.80022300 |
| H  | 0.52841600  | -3.97313500 | 1.24344000  |
| H  | 0.96043400  | -2.29463300 | 0.92863000  |
| C  | 2.63484200  | -3.83116000 | -0.60094200 |
| H  | 0.65384400  | -4.50601500 | -1.18575700 |
| H  | 0.97988100  | -2.82126100 | -1.56282900 |
| C  | 3.35030400  | -4.19996800 | -1.90309600 |
| H  | 3.08396600  | -2.92446200 | -0.17609900 |
| H  | 2.78076500  | -4.62482100 | 0.14370400  |
| H  | 4.41855500  | -4.36402800 | -1.73362700 |
| H  | 2.93786800  | -5.11630000 | -2.33884600 |
| H  | 3.24874400  | -3.40232700 | -2.64776900 |
| C  | -5.46225900 | -0.52449900 | 0.01594000  |
| H  | -6.50474700 | -0.22244200 | -0.00164000 |
| C  | -5.12287700 | -1.84437300 | 0.08504900  |
| H  | -5.88877300 | -2.61240500 | 0.12401400  |
| C  | 1.72820800  | 3.83371400  | 2.65420300  |
| H  | 2.63385300  | 4.44530800  | 2.60950400  |
| H  | 1.16464200  | 4.13487000  | 3.54386400  |
| H  | 2.03970600  | 2.79189400  | 2.79292000  |
| C  | -1.20799000 | 3.30979000  | 0.10553900  |
| H  | -1.59810300 | 4.32842300  | 0.02130300  |
| H  | -0.54188100 | 3.15016000  | -0.74313800 |
| C  | -0.40067600 | 3.16783100  | 1.41433100  |
| H  | -0.15256100 | 2.11029200  | 1.56367400  |
| H  | -1.02198500 | 3.46687100  | 2.26807800  |
| C  | 0.88843300  | 3.99517800  | 1.38394300  |
| H  | 0.63704500  | 5.05325000  | 1.23679900  |
| H  | 1.48242000  | 3.69912300  | 0.50906600  |
| C  | -2.34424300 | 2.33332800  | 0.01081700  |
| C  | 3.02810600  | 0.30854500  | 0.45445500  |
| C  | 4.27314700  | -0.23288900 | 0.10496300  |
| C  | 2.45223300  | 0.03381600  | 1.70390100  |
| C  | 4.93793900  | -1.05414000 | 1.01383100  |
| H  | 4.70779400  | 0.00515900  | -0.85932700 |
| C  | 3.12909100  | -0.78658500 | 2.60566700  |
| H  | 1.49896700  | 0.47480500  | 1.97223300  |
| C  | 4.36650400  | -1.33515000 | 2.25926000  |
| H  | 5.90637200  | -1.46841400 | 0.75224500  |
| H  | 2.69568300  | -0.98832600 | 3.58009900  |
| H  | 4.89182400  | -1.97316400 | 2.96303400  |
| Ni | -0.30215100 | -0.05932100 | -0.37126700 |
| C  | 2.35180900  | 1.16097100  | -0.58218800 |
| O  | 3.01919800  | 1.90257000  | -1.33999200 |
| N  | 1.03430300  | 1.01503400  | -0.57981500 |
| C  | 1.78813500  | 2.68853000  | -2.63178000 |
| O  | 0.73715900  | 2.23674500  | -2.20576800 |
| O  | 2.42668000  | 3.32529200  | -3.37634300 |
| H  | 0.68598400  | -0.96691700 | -0.79286300 |

IM1''

|    |             |             |             |
|----|-------------|-------------|-------------|
| C  | 2.93137700  | -0.01595800 | -0.23736800 |
| C  | 4.27745600  | -0.24330200 | -0.58089800 |
| C  | 4.59335400  | -1.54043600 | -1.05298900 |
| H  | 5.61526600  | -1.77727500 | -1.33455300 |
| C  | 3.60113700  | -2.49231600 | -1.15292100 |
| H  | 3.82679400  | -3.49046800 | -1.51114900 |
| C  | 2.26070000  | -2.19401200 | -0.79609300 |
| C  | 2.51920600  | 1.25961700  | 0.24940400  |
| C  | 3.45464600  | 2.30363300  | 0.38841100  |
| C  | 2.95381700  | 3.53169200  | 0.88227900  |
| C  | 0.73087400  | 2.55418500  | 1.03082000  |
| C  | 1.61565800  | 3.64824400  | 1.19762000  |
| H  | 3.62585200  | 4.37503300  | 1.01165700  |
| H  | 1.21648600  | 4.58157100  | 1.57787200  |
| N  | 1.19887900  | 1.39005500  | 0.56439800  |
| N  | 1.96130300  | -0.96846700 | -0.34436600 |
| C  | -2.40600700 | -1.42553300 | -0.36249400 |
| O  | -2.23715400 | -2.41264300 | -1.07749400 |
| Ni | 0.16043700  | -0.28787400 | 0.18208100  |
| N  | -1.30945500 | -0.97813500 | 0.37170900  |
| C  | 1.17790300  | -3.23060000 | -0.84953600 |
| C  | 0.88077300  | -3.81419200 | 0.55214000  |
| H  | 1.48154800  | -4.03451800 | -1.52681000 |
| H  | 0.25685700  | -2.79038800 | -1.24613300 |
| C  | -0.24795900 | -4.85028100 | 0.51581100  |
| H  | 1.79431000  | -4.25940500 | 0.96772700  |
| H  | 0.59638800  | -2.99195400 | 1.22274900  |
| C  | -0.58485700 | -5.38968900 | 1.90879200  |
| H  | -1.13389500 | -4.38909400 | 0.06482200  |
| H  | 0.04453600  | -5.67848300 | -0.14303700 |
| H  | -1.38765100 | -6.13111700 | 1.86002200  |
| H  | 0.28433900  | -5.86897000 | 2.37300200  |
| H  | -0.91626700 | -4.58374800 | 2.57384200  |
| C  | -0.73968000 | 2.66741900  | 1.32914700  |
| C  | -1.59170300 | 2.91682100  | 0.06192800  |
| H  | -0.89786400 | 3.48132300  | 2.04378000  |
| H  | -1.06871200 | 1.73998400  | 1.81034500  |
| C  | -1.30459200 | 4.24869700  | -0.63817200 |
| H  | -1.43523100 | 2.08656600  | -0.63850300 |
| H  | -2.64670400 | 2.86913800  | 0.35418200  |
| C  | -2.20354800 | 4.46633500  | -1.85905900 |
| H  | -1.44434000 | 5.07081100  | 0.07690700  |
| H  | -0.25141300 | 4.28669800  | -0.94768900 |
| H  | -1.98757700 | 5.42124000  | -2.34655800 |
| H  | -2.06024600 | 3.67211900  | -2.60038200 |
| H  | -3.26112600 | 4.46753900  | -1.57401600 |
| C  | -3.68406900 | -0.70634800 | -0.18195400 |
| C  | -3.86636300 | 0.22158700  | 0.85668800  |
| C  | -4.72141600 | -0.96147300 | -1.09164000 |
| C  | -5.07780100 | 0.89822500  | 0.97514500  |
| H  | -3.07223100 | 0.38910300  | 1.57725500  |
| C  | -5.92860800 | -0.27946400 | -0.96975500 |
| H  | -4.56099200 | -1.68958600 | -1.87991400 |
| C  | -6.10611700 | 0.65096600  | 0.06009000  |

|   |             |             |             |
|---|-------------|-------------|-------------|
| H | -5.22751600 | 1.60659400  | 1.78400100  |
| H | -6.73251000 | -0.47188100 | -1.67304400 |
| H | -7.05056000 | 1.17833300  | 0.15425700  |
| C | 5.21707600  | 0.83161400  | -0.43335900 |
| C | 4.82235800  | 2.05511000  | 0.03165900  |
| H | 6.25412000  | 0.65363900  | -0.69996900 |
| H | 5.54170100  | 2.86067700  | 0.13979800  |
| H | -0.39514100 | 0.01069900  | -1.09313300 |

**PR2''**

|   |             |             |             |
|---|-------------|-------------|-------------|
| C | -5.64179300 | 0.93990500  | -1.65497300 |
| C | -6.25055500 | -0.28833100 | -1.53116100 |
| C | -5.54106600 | -1.36472600 | -0.94700800 |
| C | -4.21856600 | -1.09821200 | -0.52751000 |
| C | -4.30748800 | 1.13355200  | -1.21276800 |
| C | -6.09017100 | -2.67475000 | -0.75744200 |
| C | -3.44901900 | -2.13447200 | 0.09782000  |
| C | -4.02535600 | -3.40793700 | 0.30315800  |
| C | -5.36087200 | -3.65801700 | -0.15410100 |
| C | -3.23575500 | -4.36617000 | 0.97953300  |
| C | -1.98733000 | -4.01486900 | 1.44053800  |
| C | -1.46494900 | -2.71814500 | 1.21225400  |
| H | -7.10402500 | -2.86716400 | -1.09449700 |
| H | -6.17035800 | 1.78019500  | -2.09197000 |
| H | -5.78404400 | -4.64555300 | 0.00049700  |
| H | -1.38162600 | -4.72288800 | 1.99531000  |
| N | -3.62535800 | 0.12106600  | -0.66793400 |
| N | -2.17865900 | -1.82580300 | 0.50904200  |
| H | -3.63088800 | -5.36290700 | 1.15292600  |
| H | -7.27053100 | -0.43968500 | -1.87251100 |
| C | 0.21415300  | 1.11254900  | -2.56837000 |
| H | 0.40658200  | 1.35495000  | -3.62513500 |
| H | -0.05405600 | 2.06531200  | -2.09558100 |
| C | 1.48157100  | 0.56135400  | -1.90680700 |
| H | 1.23640500  | 0.20240200  | -0.90043600 |
| H | 1.86549800  | -0.30282500 | -2.46200900 |
| C | 2.56502200  | 1.63688800  | -1.77183200 |
| H | 2.15087400  | 2.50096900  | -1.24469000 |
| H | 2.90758000  | 1.98533300  | -2.75295700 |
| S | 4.01960200  | 1.10447300  | -0.79090000 |
| C | 4.98053900  | 0.19468100  | -2.08559700 |
| H | 4.39018500  | -0.65271800 | -2.44589400 |
| H | 5.13843600  | 0.88466400  | -2.92153100 |
| C | 6.29525400  | -0.27604200 | -1.51623300 |
| C | 7.29580800  | 0.65016000  | -1.18813900 |
| C | 6.53641500  | -1.63801200 | -1.29925300 |
| C | 8.51114500  | 0.22177500  | -0.65634900 |
| H | 7.11388300  | 1.70947500  | -1.34842100 |
| C | 7.75357500  | -2.06918000 | -0.76799800 |
| H | 5.77028600  | -2.36501300 | -1.55442500 |
| C | 8.74305400  | -1.13996900 | -0.44397400 |
| H | 9.27896500  | 0.94935200  | -0.41037600 |
| H | 7.92850500  | -3.12947600 | -0.61055600 |
| H | 9.69088100  | -1.47358600 | -0.03224700 |

|    |             |             |             |
|----|-------------|-------------|-------------|
| C  | -0.11999400 | -2.33999300 | 1.76794200  |
| C  | 1.05974000  | -2.61910400 | 0.81426400  |
| H  | 0.03788400  | -2.89545500 | 2.69880100  |
| H  | -0.13004800 | -1.27906000 | 2.03095000  |
| C  | 2.37679300  | -2.03723600 | 1.34215000  |
| H  | 1.15458700  | -3.70126000 | 0.65760500  |
| H  | 0.84620200  | -2.18151500 | -0.16744800 |
| C  | 3.56387100  | -2.38673200 | 0.44411300  |
| H  | 2.28485000  | -0.94603700 | 1.41762800  |
| H  | 2.55461100  | -2.40478100 | 2.36131700  |
| H  | 4.48516400  | -1.92063300 | 0.80061900  |
| H  | 3.72351900  | -3.47014100 | 0.39767400  |
| H  | 3.39731600  | -2.02223700 | -0.57469000 |
| C  | -3.66394800 | 2.48754000  | -1.29674400 |
| C  | -3.94560700 | 3.33375000  | -0.03339100 |
| H  | -4.03699600 | 3.01439600  | -2.18211900 |
| H  | -2.58274200 | 2.37681500  | -1.40083100 |
| C  | -3.14914500 | 4.64326300  | -0.04110600 |
| H  | -5.02172400 | 3.54005500  | 0.03768100  |
| H  | -3.66863500 | 2.74429700  | 0.84730800  |
| C  | -3.39334900 | 5.48100300  | 1.21717200  |
| H  | -2.08189700 | 4.40407700  | -0.12645300 |
| H  | -3.41425300 | 5.22617700  | -0.93352300 |
| H  | -2.81530900 | 6.40950200  | 1.19201200  |
| H  | -4.45098000 | 5.74836700  | 1.32037700  |
| H  | -3.09965000 | 4.93006300  | 2.11805500  |
| C  | -1.06411400 | -1.07386500 | -2.16976400 |
| C  | -0.99723400 | 0.23009900  | -2.53771800 |
| H  | -1.97873300 | -1.64060200 | -2.30542300 |
| H  | -0.17898700 | -1.63114500 | -1.88621200 |
| H  | -1.91484300 | 0.69544300  | -2.89438900 |
| Ni | -1.63645700 | -0.02673600 | -0.07331500 |
| H  | -0.29075200 | -0.23385000 | 0.25396700  |
| C  | -0.17848000 | 2.13415800  | 0.90424600  |
| O  | 0.11382000  | 2.98256700  | 0.04236400  |
| N  | -1.35464200 | 1.49450400  | 0.65682700  |
| C  | 0.64465300  | 1.80061000  | 2.08545100  |
| C  | 0.10873600  | 1.08390400  | 3.16676000  |
| C  | 2.00104200  | 2.15167600  | 2.07136100  |
| C  | 0.93519000  | 0.70872700  | 4.22330400  |
| H  | -0.94935200 | 0.83689700  | 3.17910400  |
| C  | 2.82603100  | 1.75986900  | 3.12385500  |
| H  | 2.39665400  | 2.71525200  | 1.23390800  |
| C  | 2.29475900  | 1.03813200  | 4.19644700  |
| H  | 0.52347700  | 0.16493100  | 5.06787200  |
| H  | 3.88071700  | 2.01406600  | 3.10406300  |
| H  | 2.93922300  | 0.73670200  | 5.01663900  |

**TS2''**

|   |             |            |             |
|---|-------------|------------|-------------|
| C | -3.33257300 | 3.55701500 | 0.03099300  |
| C | -4.55714500 | 3.04262300 | -0.32532600 |
| C | -4.70029800 | 1.64658300 | -0.51118600 |
| C | -3.54323600 | 0.85862100 | -0.32465100 |
| C | -2.20563500 | 2.70872600 | 0.19465000  |

|    |             |             |             |
|----|-------------|-------------|-------------|
| C  | -5.93672200 | 1.01058800  | -0.85828600 |
| C  | -3.62783900 | -0.56724600 | -0.45287900 |
| C  | -4.86808700 | -1.17285500 | -0.75694500 |
| C  | -6.01823000 | -0.34687300 | -0.97763800 |
| C  | -4.89662600 | -2.58674700 | -0.79310900 |
| C  | -3.75766700 | -3.29805500 | -0.49011500 |
| C  | -2.54725700 | -2.62863600 | -0.18305700 |
| H  | -6.81375100 | 1.63168000  | -1.01193200 |
| H  | -3.20211200 | 4.62166400  | 0.19165900  |
| H  | -6.96084100 | -0.82489300 | -1.22514700 |
| H  | -3.76891500 | -4.38234300 | -0.46853100 |
| N  | -2.32969200 | 1.39018900  | 0.00672100  |
| N  | -2.49055100 | -1.29082800 | -0.21658700 |
| H  | -5.82437700 | -3.09954000 | -1.02974000 |
| H  | -5.41625900 | 3.69360100  | -0.45893600 |
| Ni | -0.90896500 | -0.06339400 | 0.05199200  |
| C  | -0.63478200 | 0.35208900  | -2.18175800 |
| C  | 0.09264200  | -0.78270600 | -1.85338800 |
| H  | -1.66499100 | 0.21812700  | -2.50689700 |
| H  | 0.12697900  | -1.03568600 | -0.18121800 |
| H  | -0.35450000 | -1.75567700 | -2.01595500 |
| H  | 1.17672700  | -0.76173300 | -1.79560200 |
| C  | -0.01695400 | 1.70384200  | -2.43449500 |
| H  | -0.06885600 | 1.86756400  | -3.52288800 |
| H  | -0.64983000 | 2.48701400  | -2.00124000 |
| C  | 1.43031700  | 1.80936500  | -1.95145100 |
| H  | 1.49169000  | 1.61494100  | -0.87561300 |
| H  | 2.00784200  | 1.02243400  | -2.43617300 |
| C  | 2.11170500  | 3.14220200  | -2.25810500 |
| H  | 1.55136000  | 3.98147300  | -1.83013800 |
| H  | 2.17971900  | 3.31389400  | -3.33906600 |
| S  | 3.78126300  | 3.29577800  | -1.50310200 |
| C  | 4.74125500  | 1.96642200  | -2.35076500 |
| H  | 4.72744200  | 2.15168900  | -3.42962500 |
| H  | 5.76530000  | 2.15814900  | -2.01095100 |
| C  | 4.35131500  | 0.52892000  | -2.05679100 |
| C  | 4.11631500  | 0.08287800  | -0.74869900 |
| C  | 4.19890600  | -0.37935900 | -3.11406100 |
| C  | 3.73189800  | -1.23685000 | -0.50674300 |
| H  | 4.17927400  | 0.78373200  | 0.07608800  |
| C  | 3.81617800  | -1.70249100 | -2.87514600 |
| H  | 4.37458500  | -0.04783700 | -4.13457200 |
| C  | 3.58211300  | -2.13668400 | -1.56820800 |
| H  | 3.54894800  | -1.56127900 | 0.51355300  |
| H  | 3.70815500  | -2.39158700 | -3.70805500 |
| H  | 3.29708100  | -3.16786100 | -1.37839400 |
| C  | -1.33127200 | -3.42033600 | 0.22036000  |
| C  | -0.70275400 | -4.27268800 | -0.90225800 |
| H  | -1.62129400 | -4.08572300 | 1.04352000  |
| H  | -0.58326700 | -2.73720400 | 0.62846100  |
| C  | 0.67221600  | -4.81563800 | -0.49267100 |
| H  | -1.37344800 | -5.10019600 | -1.16468600 |
| H  | -0.59669800 | -3.67633400 | -1.81680200 |
| C  | 1.36211800  | -5.59186600 | -1.61696500 |



|   |             |             |             |
|---|-------------|-------------|-------------|
| H | 1.30640500  | -3.97363800 | -0.18266900 |
| H | 0.55997800  | -5.45402100 | 0.39302500  |
| H | 2.33481100  | -5.97452000 | -1.29414400 |
| H | 0.75870500  | -6.44689700 | -1.93993300 |
| H | 1.52805500  | -4.95203500 | -2.49153200 |
| C | -0.88935800 | 3.28863600  | 0.62616600  |
| C | -0.82275700 | 3.49731800  | 2.15592000  |
| H | -0.73996400 | 4.25067800  | 0.12162000  |
| H | -0.07489700 | 2.62469500  | 0.33692800  |
| C | 0.55770900  | 4.00500100  | 2.59072200  |
| H | -1.60491900 | 4.20155400  | 2.46989100  |
| H | -1.03276600 | 2.53885100  | 2.64286200  |
| C | 0.66370400  | 4.17137900  | 4.10909600  |
| H | 1.31893100  | 3.29885000  | 2.23875600  |
| H | 0.76416600  | 4.96396300  | 2.09623300  |
| H | 1.65358800  | 4.53756400  | 4.39719900  |
| H | -0.07894400 | 4.88311000  | 4.48718700  |
| H | 0.49988600  | 3.21602300  | 4.62069300  |
| C | 1.25916200  | 0.21227500  | 1.84180200  |
| O | 2.07879500  | 1.04082300  | 1.39925700  |
| N | -0.01735200 | 0.40369900  | 1.44640700  |
| C | 1.60773200  | -0.89097900 | 2.77134500  |
| C | 0.65723400  | -1.84060700 | 3.17401700  |
| C | 2.93204300  | -0.98568600 | 3.21934500  |
| C | 1.03556300  | -2.88769600 | 4.01179900  |
| H | -0.37126000 | -1.74889300 | 2.83739200  |
| C | 3.30684400  | -2.03749700 | 4.05282000  |
| H | 3.64604300  | -0.23178100 | 2.90384800  |
| C | 2.36063400  | -2.98860000 | 4.44715700  |
| H | 0.30172600  | -3.62236300 | 4.32910800  |
| H | 4.33280900  | -2.11501100 | 4.39877200  |
| H | 2.65481900  | -3.80594300 | 5.09867600  |

## IM2''

|   |             |             |             |
|---|-------------|-------------|-------------|
| C | -5.41809000 | 1.98061300  | -1.46018300 |
| C | -6.22637600 | 0.86612500  | -1.52068800 |
| C | -5.76059600 | -0.36696100 | -1.00415900 |
| C | -4.46336700 | -0.36578600 | -0.45453000 |
| C | -4.11498400 | 1.90989700  | -0.90339000 |
| C | -6.51324800 | -1.58828800 | -1.00055300 |
| C | -3.92198600 | -1.56135900 | 0.10987200  |
| C | -4.68593100 | -2.74548500 | 0.12269800  |
| C | -5.99653500 | -2.73251400 | -0.46029500 |
| C | -4.08947800 | -3.87040500 | 0.74192600  |
| C | -2.84091800 | -3.75254400 | 1.31277200  |
| C | -2.13222800 | -2.52478600 | 1.26666900  |
| H | -7.50971000 | -1.58459400 | -1.43115600 |
| H | -5.76162200 | 2.93434600  | -1.84487600 |
| H | -6.57674400 | -3.64986400 | -0.45447200 |
| H | -2.38467600 | -4.59685200 | 1.81666100  |
| N | -3.67016600 | 0.74284500  | -0.41839900 |
| N | -2.66875900 | -1.46858600 | 0.64315900  |
| H | -4.62811900 | -4.81279600 | 0.78067600  |
| H | -7.21873400 | 0.92641300  | -1.95810400 |

|    |             |             |             |
|----|-------------|-------------|-------------|
| Ni | -1.88444900 | 0.37589600  | 0.33607000  |
| C  | -0.83731000 | 0.04566600  | -1.44910900 |
| C  | -1.83403600 | -0.33994600 | -2.51256100 |
| H  | -0.41947500 | 1.04012600  | -1.60696100 |
| H  | -2.40669000 | -1.23224500 | -2.24591200 |
| H  | -2.51684800 | 0.46980000  | -2.76902800 |
| H  | -1.26021700 | -0.58644600 | -3.41855800 |
| C  | 0.18681900  | -1.00974800 | -1.11648800 |
| C  | 1.42212800  | -0.93349000 | -2.04663000 |
| H  | 1.13205000  | -0.89897200 | -3.10176800 |
| H  | 1.94790900  | 0.00314200  | -1.83525000 |
| C  | 2.34487500  | -2.14135900 | -1.79791800 |
| H  | 2.03208000  | -2.99755800 | -2.40264000 |
| H  | 2.28682800  | -2.45394300 | -0.74966000 |
| S  | 4.10752900  | -1.82984600 | -2.17926600 |
| C  | 4.50867700  | -0.90600800 | -0.62785700 |
| H  | 3.71447000  | -0.17181400 | -0.46154400 |
| H  | 4.48957200  | -1.61244400 | 0.20789000  |
| C  | 5.84064500  | -0.20953600 | -0.70977600 |
| C  | 6.91805300  | -0.63408200 | 0.07532600  |
| C  | 6.00891900  | 0.90115900  | -1.54949800 |
| C  | 8.13834700  | 0.04503100  | 0.03556100  |
| H  | 6.80023800  | -1.49890000 | 0.72355200  |
| C  | 7.22591500  | 1.57900000  | -1.59314900 |
| H  | 5.17842100  | 1.22923800  | -2.16894700 |
| C  | 8.29405100  | 1.15395300  | -0.79684600 |
| H  | 8.96556400  | -0.29429600 | 0.65194100  |
| H  | 7.34341500  | 2.43792200  | -2.24739600 |
| H  | 9.24191200  | 1.68261600  | -0.82950000 |
| C  | -0.79922000 | -2.37406900 | 1.95139700  |
| C  | 0.27327600  | -3.40292200 | 1.53996200  |
| H  | -0.97015500 | -2.45365400 | 3.03385800  |
| H  | -0.43178500 | -1.36038100 | 1.77662900  |
| C  | 1.65336600  | -3.03624200 | 2.10232700  |
| H  | -0.01058000 | -4.40285800 | 1.89008900  |
| H  | 0.32902200  | -3.46463600 | 0.44729000  |
| C  | 2.73260000  | -4.06508000 | 1.75376400  |
| H  | 1.94650500  | -2.04900100 | 1.72095400  |
| H  | 1.58165300  | -2.92997800 | 3.19315600  |
| H  | 3.70498400  | -3.76738700 | 2.15755000  |
| H  | 2.48897800  | -5.05038100 | 2.16520200  |
| H  | 2.84446100  | -4.17815800 | 0.66981500  |
| C  | -3.23973400 | 3.12321500  | -0.79913600 |
| C  | -3.28047600 | 3.72834100  | 0.62443600  |
| H  | -3.57151600 | 3.87000200  | -1.52722600 |
| H  | -2.20165000 | 2.86443100  | -1.03179100 |
| C  | -2.38520300 | 4.96658400  | 0.74586800  |
| H  | -4.31621100 | 3.97985300  | 0.88876600  |
| H  | -2.94327200 | 2.96450500  | 1.33628200  |
| C  | -2.35520600 | 5.52076500  | 2.17303700  |
| H  | -1.37235100 | 4.70017500  | 0.42393200  |
| H  | -2.74308700 | 5.74020500  | 0.05348300  |
| H  | -1.71696800 | 6.40692600  | 2.23828900  |
| H  | -3.35725300 | 5.80547000  | 2.51333900  |

|   |             |             |             |
|---|-------------|-------------|-------------|
| H | -1.96347100 | 4.77565800  | 2.87507800  |
| C | 0.37706000  | 2.10247300  | 0.43928900  |
| O | 0.20882200  | 2.96804700  | -0.43669700 |
| N | -0.70093900 | 1.39659500  | 0.88745000  |
| C | 1.70761600  | 1.78319700  | 1.02450400  |
| C | 1.86188000  | 0.84532500  | 2.05799500  |
| C | 2.83285000  | 2.44302800  | 0.50499000  |
| C | 3.13290300  | 0.56601400  | 2.55932500  |
| H | 0.98893800  | 0.35774900  | 2.47968800  |
| C | 4.09801600  | 2.16957300  | 1.01762200  |
| H | 2.68985600  | 3.16494700  | -0.29209100 |
| C | 4.24955700  | 1.22807000  | 2.04156300  |
| H | 3.25131800  | -0.15971800 | 3.35810000  |
| H | 4.97076400  | 2.66444500  | 0.60617000  |
| H | 5.24100700  | 1.00433300  | 2.42197600  |
| H | -0.27748700 | -2.00058200 | -1.17628500 |
| H | 0.56546100  | -0.88726400 | -0.09961100 |

**TS3''**

|    |             |             |             |
|----|-------------|-------------|-------------|
| C  | 5.04426200  | -1.59067100 | 1.95903300  |
| C  | 5.10945100  | -2.89785700 | 1.53990100  |
| C  | 4.08889800  | -3.41416700 | 0.70798400  |
| C  | 3.04954000  | -2.52679600 | 0.34365600  |
| C  | 3.96541200  | -0.75472700 | 1.57024800  |
| C  | 4.06978700  | -4.76453900 | 0.23201400  |
| C  | 1.99079600  | -2.98599600 | -0.51140500 |
| C  | 2.01397900  | -4.31804100 | -0.98523900 |
| C  | 3.06836000  | -5.20073400 | -0.58412400 |
| C  | 0.98003300  | -4.70113000 | -1.86795300 |
| C  | 0.03973800  | -3.77577300 | -2.25334000 |
| C  | 0.07110300  | -2.45271700 | -1.74563200 |
| H  | 4.87385400  | -5.43101700 | 0.52826100  |
| H  | 5.81319100  | -1.17324200 | 2.60000500  |
| H  | 3.05864400  | -6.22115900 | -0.95421300 |
| H  | -0.73078900 | -4.04458500 | -2.96499800 |
| N  | 3.00449200  | -1.23007300 | 0.76754300  |
| N  | 1.01018600  | -2.09227700 | -0.85711300 |
| H  | 0.95247200  | -5.71506600 | -2.25643900 |
| H  | 5.93142100  | -3.53989300 | 1.84295800  |
| Ni | 1.29883100  | -0.31337000 | 0.08264200  |
| C  | 0.40553700  | -0.86290900 | 1.99792200  |
| C  | 0.09200000  | -2.32138600 | 2.17186900  |
| H  | 1.22216300  | -0.47401100 | 2.60183400  |
| H  | -0.53878800 | -2.71317000 | 1.37164000  |
| H  | 1.00497500  | -2.91865100 | 2.22188900  |
| H  | -0.44206400 | -2.46320200 | 3.12075400  |
| C  | -0.48635000 | 0.08275100  | 1.49063800  |
| H  | -0.24544900 | 1.12820000  | 1.69015500  |
| H  | 0.06220100  | 0.32011800  | -0.24797000 |
| C  | -1.90480000 | -0.22509400 | 1.08567100  |
| H  | -1.96935800 | -1.15718000 | 0.51834100  |
| H  | -2.45291600 | -0.40516100 | 2.02166400  |
| C  | -2.57587900 | 0.91803600  | 0.31586700  |
| H  | -2.06815100 | 1.08479700  | -0.64069000 |

|   |              |             |             |
|---|--------------|-------------|-------------|
| H | -2.50078400  | 1.85578300  | 0.87780700  |
| S | -4.32743800  | 0.59574800  | -0.09999200 |
| C | -5.12848900  | 0.93458900  | 1.53573000  |
| H | -4.71567300  | 0.25401000  | 2.28637800  |
| H | -4.88438300  | 1.96205100  | 1.82335400  |
| C | -6.61679300  | 0.74137500  | 1.40195800  |
| C | -7.42854200  | 1.78791200  | 0.94498100  |
| C | -7.20328900  | -0.49517900 | 1.69937700  |
| C | -8.80350400  | 1.60482300  | 0.79980300  |
| H | -6.97916800  | 2.74785300  | 0.70405000  |
| C | -8.57852200  | -0.67995700 | 1.55507000  |
| H | -6.57956400  | -1.31428100 | 2.04921900  |
| C | -9.38135300  | 0.37036500  | 1.10526600  |
| H | -9.42363500  | 2.42520400  | 0.45119300  |
| H | -9.02319300  | -1.64101100 | 1.79590400  |
| H | -10.45228400 | 0.22853900  | 0.99555200  |
| C | -0.88889900  | -1.42527800 | -2.29370900 |
| C | -2.36354600  | -1.84935600 | -2.41565100 |
| H | -0.51497000  | -1.16391500 | -3.29505800 |
| H | -0.80976700  | -0.50894400 | -1.70479900 |
| C | -3.19562100  | -0.81711800 | -3.18815800 |
| H | -2.44468000  | -2.81361000 | -2.93104800 |
| H | -2.79489000  | -1.99665200 | -1.41781300 |
| C | -4.66524400  | -1.22611000 | -3.31303400 |
| H | -3.12594900  | 0.15900500  | -2.69175300 |
| H | -2.75878200  | -0.68224600 | -4.18687300 |
| H | -5.23554800  | -0.47602700 | -3.86811100 |
| H | -4.76430600  | -2.18099300 | -3.84157800 |
| H | -5.12583300  | -1.33281400 | -2.32620800 |
| C | 3.93858400   | 0.67054800  | 2.04728300  |
| C | 4.80853700   | 1.59504700  | 1.16310100  |
| H | 4.31571900   | 0.69997300  | 3.07647500  |
| H | 2.91637000   | 1.05354000  | 2.05969400  |
| C | 4.73530300   | 3.05889500  | 1.61764500  |
| H | 5.85030400   | 1.24811400  | 1.18029800  |
| H | 4.45860400   | 1.51177000  | 0.12931700  |
| C | 5.46153000   | 4.00325400  | 0.65525000  |
| H | 3.68410000   | 3.35758100  | 1.70240000  |
| H | 5.16284900   | 3.14651900  | 2.62539800  |
| H | 5.40966700   | 5.03838400  | 1.00560700  |
| H | 6.51970500   | 3.73630300  | 0.55594900  |
| H | 5.00848800   | 3.96693300  | -0.34145300 |
| C | 1.59511100   | 2.53146100  | 0.14065700  |
| O | 1.11166500   | 2.75967900  | 1.27727600  |
| N | 1.93048400   | 1.26621800  | -0.14548100 |
| C | 1.95031800   | 3.60159500  | -0.82656600 |
| C | 2.62558800   | 3.31512700  | -2.02276000 |
| C | 1.62376000   | 4.92390200  | -0.50040800 |
| C | 2.97013500   | 4.35111600  | -2.88811200 |
| H | 2.89098100   | 2.28878800  | -2.26045100 |
| C | 1.97181700   | 5.95638800  | -1.36861800 |
| H | 1.11034300   | 5.11939100  | 0.43516800  |
| C | 2.64437600   | 5.67121500  | -2.56059000 |
| H | 3.49719700   | 4.13402300  | -3.81204300 |

|   |            |            |             |
|---|------------|------------|-------------|
| H | 1.72325000 | 6.98263400 | -1.11657700 |
| H | 2.91795600 | 6.47804000 | -3.23388600 |

**IM3''**

|   |             |             |             |
|---|-------------|-------------|-------------|
| C | 5.16443800  | 0.04115000  | -0.42462000 |
| C | 5.47390800  | 1.01879800  | 0.67435600  |
| H | 6.03709600  | -0.42690500 | -0.88089000 |
| H | 4.57900400  | 1.46212200  | 1.11732100  |
| H | 6.03821400  | 0.52981800  | 1.47858300  |
| H | 6.10553200  | 1.83563900  | 0.30249100  |
| C | 3.96120700  | -0.30733500 | -0.89608000 |
| H | 3.92609300  | -1.04701900 | -1.69673900 |
| C | 2.61661100  | 0.17863200  | -0.42184600 |
| H | 2.70709100  | 1.03887000  | 0.24666300  |
| H | 2.03033300  | 0.51537700  | -1.28669000 |
| C | 1.84650100  | -0.93864200 | 0.30580500  |
| H | 2.40418200  | -1.25591500 | 1.19262600  |
| H | 1.73967400  | -1.82039700 | -0.33755200 |
| S | 0.18775700  | -0.45847500 | 0.92931500  |
| C | -0.73251700 | -0.31899700 | -0.66905100 |
| H | -0.29579100 | 0.48559000  | -1.26729500 |
| H | -0.60862800 | -1.26048300 | -1.21488100 |
| C | -2.18780100 | -0.04323500 | -0.39229000 |
| C | -3.08113900 | -1.09815300 | -0.16335900 |
| C | -2.66448700 | 1.27213700  | -0.32692400 |
| C | -4.42455800 | -0.84474800 | 0.11259900  |
| H | -2.71666400 | -2.12155600 | -0.20011800 |
| C | -4.00784800 | 1.52877500  | -0.04975600 |
| H | -1.97677500 | 2.09731400  | -0.49388200 |
| C | -4.89181100 | 0.47046500  | 0.16965700  |
| H | -5.10650300 | -1.67300200 | 0.28309200  |
| H | -4.36383900 | 2.55419600  | -0.00609200 |
| H | -5.93815900 | 0.66887000  | 0.38338800  |

**TS4''**

|   |             |             |            |
|---|-------------|-------------|------------|
| C | 0.36000000  | -4.00998700 | 1.22479700 |
| C | 1.64159600  | -4.46163100 | 1.42608300 |
| C | 2.72581800  | -3.56612300 | 1.27021100 |
| C | 2.41367400  | -2.24280600 | 0.88170900 |
| C | 0.11433100  | -2.66505300 | 0.84178300 |
| C | 4.09003200  | -3.93596500 | 1.50191100 |
| C | 3.47169100  | -1.28212400 | 0.74656400 |
| C | 4.80462900  | -1.66324100 | 1.02751900 |
| C | 5.09312800  | -3.01849100 | 1.38884800 |
| C | 5.78897400  | -0.65064800 | 0.95916900 |
| C | 5.41617500  | 0.63879200  | 0.66015600 |
| C | 4.06339600  | 0.95276500  | 0.37841600 |
| H | 4.30749900  | -4.96083000 | 1.78645800 |
| H | -0.49104000 | -4.66960000 | 1.35370700 |
| H | 6.12411600  | -3.29594500 | 1.58460700 |
| H | 6.14923900  | 1.43754500  | 0.64009400 |
| N | 1.13436800  | -1.81651400 | 0.65859900 |
| N | 3.12788400  | -0.00635200 | 0.39045400 |
| H | 6.82650100  | -0.89496200 | 1.16789000 |

|    |             |             |             |
|----|-------------|-------------|-------------|
| H  | 1.83186700  | -5.49165400 | 1.71344000  |
| Ni | 1.14047500  | 0.12613500  | -0.07701000 |
| C  | 1.38102300  | -0.73243800 | -2.07261000 |
| C  | 1.56324200  | 0.64230000  | -2.26527700 |
| H  | 2.29329600  | -1.29312000 | -1.87234600 |
| H  | 1.21808800  | 1.38883200  | -0.74023100 |
| H  | 2.59834100  | 0.96193200  | -2.17562500 |
| C  | 0.23956900  | -1.61413700 | -2.51302000 |
| H  | 0.55557700  | -2.06681400 | -3.46597700 |
| H  | 0.19171900  | -2.45365800 | -1.81106300 |
| C  | -1.15993700 | -1.01059900 | -2.68208800 |
| H  | -1.43476700 | -0.38696900 | -1.82811100 |
| H  | -1.21135700 | -0.38759600 | -3.57878600 |
| C  | 3.68950800  | 2.38235900  | 0.08365500  |
| C  | 4.32096700  | 2.94557700  | -1.20679800 |
| H  | 4.01702500  | 2.99804100  | 0.93123100  |
| H  | 2.60128500  | 2.47368300  | 0.04389000  |
| C  | 3.77969600  | 4.33697400  | -1.55636400 |
| H  | 5.41151900  | 2.99030100  | -1.09591500 |
| H  | 4.13757800  | 2.26222600  | -2.04672500 |
| C  | 4.40245200  | 4.90753600  | -2.83327300 |
| H  | 2.68781400  | 4.27888300  | -1.66833600 |
| H  | 3.96298500  | 5.01713500  | -0.71455600 |
| H  | 3.99747600  | 5.89730900  | -3.06194600 |
| H  | 5.48865800  | 5.00622300  | -2.73311400 |
| H  | 4.20539100  | 4.25877700  | -3.69434700 |
| C  | -1.29737700 | -2.18440700 | 0.70971700  |
| C  | -1.85586500 | -1.71374200 | 2.07087400  |
| H  | -1.92390700 | -2.98363900 | 0.30282500  |
| H  | -1.34185600 | -1.34943400 | 0.01413700  |
| C  | -3.24526600 | -1.09453300 | 1.90885900  |
| H  | -1.89011500 | -2.55852000 | 2.77205000  |
| H  | -1.16648100 | -0.97404100 | 2.49410500  |
| C  | -3.83226100 | -0.58569500 | 3.22621600  |
| H  | -3.18462300 | -0.26866400 | 1.19204700  |
| H  | -3.92209800 | -1.82763800 | 1.45456700  |
| H  | -4.82704600 | -0.15946600 | 3.06555400  |
| H  | -3.92665400 | -1.39212400 | 3.96221400  |
| H  | -3.20297000 | 0.19809900  | 3.66164500  |
| C  | -1.19806300 | 1.72220700  | 0.29484700  |
| O  | -1.62650200 | 1.86526200  | -0.86957700 |
| N  | -0.33314000 | 0.72359900  | 0.56712200  |
| C  | -1.67759900 | 2.54623900  | 1.43672100  |
| C  | -1.35274700 | 2.23180000  | 2.76509800  |
| C  | -2.48216600 | 3.65875400  | 1.15435900  |
| C  | -1.83514700 | 3.02608300  | 3.80348000  |
| H  | -0.74112600 | 1.36092500  | 2.97865500  |
| C  | -2.96621000 | 4.44650100  | 2.19601100  |
| H  | -2.71687900 | 3.88392500  | 0.11915100  |
| C  | -2.64378400 | 4.13075700  | 3.51983300  |
| H  | -1.59112900 | 2.78010100  | 4.83234200  |
| H  | -3.59382300 | 5.30537600  | 1.97916600  |
| H  | -3.02453400 | 4.74462600  | 4.33057200  |
| S  | -2.34307000 | -2.40206800 | -2.87217600 |

|   |             |             |             |
|---|-------------|-------------|-------------|
| C | -3.90869100 | -1.47429300 | -3.21446800 |
| H | -4.56432300 | -2.22749600 | -3.65996700 |
| H | -3.68673900 | -0.73463700 | -3.99005400 |
| C | -4.55870700 | -0.83401700 | -2.01527100 |
| C | -4.24884300 | 0.48286800  | -1.65414800 |
| C | -5.50144900 | -1.53937200 | -1.25357900 |
| C | -4.86981500 | 1.08600200  | -0.55864300 |
| H | -3.51779700 | 1.04498000  | -2.22454800 |
| C | -6.13499800 | -0.93391400 | -0.16855900 |
| H | -5.75032600 | -2.56284100 | -1.52323000 |
| C | -5.82292000 | 0.38340300  | 0.17986900  |
| H | -4.60448000 | 2.10229400  | -0.28583900 |
| H | -6.87608300 | -1.48670700 | 0.40144200  |
| H | -6.31852900 | 0.85616900  | 1.02263500  |
| C | 0.66581100  | 1.58721300  | -3.02743900 |
| H | 0.66876700  | 1.29331300  | -4.08363300 |
| H | -0.35524700 | 1.58257400  | -2.64903200 |
| H | 1.05004800  | 2.60765200  | -2.95758200 |
